# Supplementary material for: Temperate Propolis Has Anti-Inflammatory Effects and Is a Potent Inhibitor of Nitric Oxide Formation in Macrophages
Source: MDPI journal article supplement (doi:10.3390/metabo10100413), 2020-10-14
Supplement: s1 [file s1]

Data with SEM values and mean areas

| m/z     | Rt   | Name                             | P LM  | L/M    | P224L | 224/L  | P225L | 225/L  | Mmean area | MSEM    | Lmean area | LSEM     | 224 mean area | 224SEM   | 225 mean area | 225SEM   |
|---------|------|----------------------------------|-------|--------|-------|--------|-------|--------|------------|---------|------------|----------|---------------|----------|---------------|----------|
| 76.040  | 15.9 | Glycine                          | 0.005 | 2.367  | 0.000 | 7.222  | 0.000 | 8.452  | 44896      | 5766    | 106264     | 13680    | 767428        | 78815    | 898192        | 84780    |
| 90.055  | 14.8 | L-Alanine                        | 0.000 | 7.373  | 0.203 | 0.864  | 0.629 | 0.950  | 5658783    | 395461  | 41721815   | 3339620  | 36050554      | 2430632  | 39630466      | 2525586  |
| 90.055  | 15.4 | L-Alanine                        | 0.000 | 8.723  | 0.024 | 0.752  | 0.142 | 0.826  | 310321     | 14848   | 2706777    | 193837   | 2034733       | 161254   | 2236822       | 221188   |
| 104.071 | 18.2 | 4-Aminobutanoate                 | 0.011 | 3.776  | 0.326 | 0.708  | 0.688 | 0.893  | 834512     | 226888  | 3151245    | 611565   | 2232624       | 646436   | 2814611       | 537968   |
| 104.107 | 14.5 | Choline                          | 0.000 | 4.826  | 0.000 | 0.407  | 0.000 | 0.379  | 33120157   | 1451347 | 159846224  | 12939802 | 65112172      | 5578133  | 60648475      | 5337327  |
| 104.107 | 4.7  | Choline                          | 0.000 | 0.307  | 0.077 | 2.198  | 0.021 | 2.899  | 1565702    | 30284   | 480426     | 63440    | 1056128       | 258734   | 1392652       | 278337   |
| 106.050 | 10.5 | L-Serine                         | 0.009 | 2.032  | 0.002 | 2.090  | 0.000 | 2.894  | 41242      | 8784    | 83813      | 9653     | 175151        | 16826    | 242555        | 12188    |
| 106.050 | 17.3 | L-Serine                         | 0.010 | 11.732 | 0.659 | 0.862  | 0.645 | 0.853  | 13028      | 3305    | 152850     | 35155    | 131793        | 29969    | 130304        | 31892    |
| 110.027 | 15.1 | Hypotaurine                      | 0.000 | 6.818  | 0.256 | 0.878  | 0.977 | 0.996  | 145768     | 6188    | 993811     | 74411    | 872208        | 67944    | 990175        | 96493    |
| 112.051 | 15.2 | Cytosine                         | 0.053 | 1.652  | 0.412 | 0.832  | 0.808 | 0.951  | 343108     | 63641   | 566904     | 78968    | 471697        | 78282    | 538957        | 79085    |
| 114.055 | 15.9 | (S)-1-Pyrroline-5-carboxylate    | 0.000 | 2.539  | 0.003 | 0.558  | 0.014 | 0.680  | 1018052    | 153266  | 2584605    | 228907   | 1442071       | 96577    | 1756708       | 136666   |
| 114.066 | 14.8 | Creatinine                       | 0.000 | 5.664  | 0.590 | 0.944  | 0.364 | 1.109  | 919173     | 43925   | 5206234    | 409167   | 4916635       | 318375   | 5774334       | 434154   |
| 115.050 | 14.8 | 5,6-Dihydrouracil                | 0.000 | 8.423  | 0.227 | 0.859  | 0.489 | 0.924  | 187573     | 12351   | 1579961    | 141262   | 1356542       | 98249    | 1459594       | 87400    |
| 115.050 | 15.4 | 5,6-Dihydrouracil                | 0.000 | 12.434 | 0.002 | 0.523  | 0.013 | 0.665  | 9555       | 1352    | 118809     | 10303    | 62143         | 3951     | 79045         | 8052     |
| 116.071 | 16.0 | L-Proline                        | 0.000 | 12.175 | 0.000 | 0.172  | 0.001 | 0.359  | 281232     | 41845   | 3423940    | 301095   | 587943        | 67532    | 1230746       | 56906    |
| 118.086 | 11.3 | L-Valine                         | 0.012 | 1.651  | 0.021 | 1.439  | 0.013 | 1.500  | 15009043   | 1203683 | 24782685   | 2625392  | 35661567      | 2959067  | 37185661      | 3135859  |
| 120.066 | 14.5 | L-Threonine                      | 0.033 | 0.718  | 0.015 | 1.359  | 0.000 | 1.704  | 2015338    | 181587  | 1447225    | 136969   | 1967247       | 110073   | 2465523       | 102353   |
| 121.051 | 23.2 | Purine                           | 0.042 | 1.562  | 0.336 | 1.864  | 0.041 | 0.563  | 17899      | 2929    | 27950      | 3175     | 52111         | 22583    | 15729         | 4092     |
| 122.027 | 14.1 | L-Cysteine                       | 0.027 | 20.174 | 0.001 | 14.423 | 0.000 | 26.437 | 455        | 288     | 9175       | 2814     | 132336        | 16862    | 242559        | 28609    |
| 122.027 | 16.1 | L-Cysteine                       | 0.052 | 0.356  | 0.020 | 0.079  | 0.021 | 0.102  | 18620      | 4696    | 6631       | 1821     | 526           | 337      | 677           | 476      |
| 123.055 | 14.2 | Nicotinamide                     | 0.013 | 2.543  | 0.610 | 0.894  | 0.756 | 1.054  | 989799     | 39793   | 2517510    | 404150   | 2251689       | 301037   | 2654115       | 114162   |
| 123.055 | 24.3 | Nicotinamide                     | 0.050 | 2.939  | 0.234 | 2.923  | 0.024 | 2.167  | 88394      | 20758   | 259832     | 66685    | 759602        | 366430   | 562961        | 89848    |
| 126.022 | 14.8 | Taurine                          | 0.001 | 3.017  | 0.214 | 0.845  | 0.346 | 0.885  | 6184935    | 251863  | 18661782   | 1655443  | 15768562      | 1414277  | 16518938      | 1392534  |
| 127.050 | 12.7 | Thymine                          | 0.042 | 5.406  | 0.002 | 2.580  | 0.001 | 2.843  | 38377      | 9524    | 207466     | 62329    | 535322        | 37467    | 589817        | 62308    |
| 129.066 | 14.9 | 5,6-Dihydrothymine               | 0.000 | 2.407  | 0.187 | 0.879  | 0.470 | 1.088  | 1605777    | 183684  | 3865090    | 279427   | 3399049       | 161275   | 4207077       | 358238   |
| 131.034 | 14.6 | Mesaconate                       | 0.001 | 0.168  | 0.003 | 14.056 | 0.000 | 22.850 | 25558      | 3573    | 4303       | 2634     | 60478         | 10992    | 98311         | 10693    |
| 131.070 | 7.6  | (S)-3-Methyl-2-oxopentanoic acid | 0.040 | 0.602  | 0.443 | 1.289  | 0.227 | 1.452  | 903000     | 52357   | 543996     | 130584   | 701465        | 147230   | 789843        | 139534   |
| 132.077 | 14.8 | Creatine                         | 0.000 | 7.404  | 0.227 | 0.869  | 0.544 | 0.936  | 34337889   | 2147474 | 254235451  | 20950093 | 220927223     | 14863776 | 238074383     | 14807902 |
| 134.045 | 14.9 | L-Aspartate                      | 0.001 | 3.285  | 0.003 | 0.387  | 0.006 | 0.490  | 262513     | 34808   | 862229     | 102553   | 334056        | 30101    | 422282        | 38395    |
| 134.045 | 16.8 | L-Aspartate                      | 0.042 | 1.796  | 0.672 | 1.087  | 0.006 | 3.225  | 9793       | 2696    | 17584      | 1871     | 19118         | 2959     | 56711         | 8831     |
| 135.066 | 10.5 | Dihydropteridine                 | 0.021 | 0.333  | 0.002 | 6.949  | 0.002 | 8.877  | 15378      | 3148    | 5128       | 1206     | 35633         | 5127     | 45518         | 7125     |

|         |      |                                         |       |         |       |        |       |        |          |         |          |         |           |          |           |          |
|---------|------|-----------------------------------------|-------|---------|-------|--------|-------|--------|----------|---------|----------|---------|-----------|----------|-----------|----------|
| 136.062 | 5.2  | Adenine                                 | 0.026 | 0.479   | 0.030 | 0.635  | 0.835 | 0.945  | 51875    | 8800    | 24848    | 2964    | 15782     | 1825     | 23472     | 5631     |
| 136.062 | 9.7  | Adenine                                 | 0.000 | 4.250   | 0.000 | 1.708  | 0.000 | 2.160  | 406031   | 45874   | 1725616  | 143043  | 2946744   | 104038   | 3728148   | 242058   |
| 136.062 | 19.6 | Adenine                                 | 0.005 | 0.450   | 0.321 | 1.192  | 0.064 | 1.480  | 89301    | 11101   | 40202    | 3784    | 47908     | 6246     | 59496     | 7960     |
| 137.046 | 8.3  | Hypoxanthine                            | 0.002 | 2.386   | 0.002 | 4.181  | 0.000 | 6.198  | 46427    | 10520   | 110756   | 11991   | 463122    | 64110    | 686472    | 60709    |
| 138.055 | 15.0 | Anthranilate                            | 0.011 | 0.553   | 0.001 | 27.497 | 0.002 | 24.970 | 40232    | 3929    | 22243    | 4200    | 611633    | 91216    | 555411    | 94187    |
| 142.026 | 16.0 | Ethanolamine phosphate                  | 0.003 | 2.367   | 0.454 | 0.895  | 0.811 | 1.038  | 460753   | 23248   | 1090508  | 118364  | 976413    | 84893    | 1132306   | 122304   |
| 146.092 | 15.3 | 4-Guanidinobutanoate                    | 0.000 | 3.130   | 0.000 | 2.063  | 0.000 | 1.968  | 295593   | 64822   | 925259   | 85865   | 1908458   | 139846   | 1820812   | 132833   |
| 146.117 | 13.4 | 4-Trimethylammonibutanoate              | 0.023 | 0.737   | 0.131 | 1.258  | 0.012 | 1.600  | 1780424  | 89072   | 1311322  | 142730  | 1650092   | 148026   | 2097512   | 203476   |
| 146.165 | 16.4 | Spermidine                              | 0.044 | 3.934   | 0.020 | 0.071  | 0.027 | 0.151  | 144786   | 69402   | 569654   | 157840  | 40314     | 5200     | 85968     | 44858    |
| 146.165 | 18.1 | Spermidine                              | 0.021 | 9.399   | 0.017 | 0.046  | 0.059 | 0.297  | 98247    | 11819   | 923425   | 249955  | 42485     | 5309     | 274473    | 161313   |
| 147.029 | 18.2 | 2-Oxoglutarate                          | 0.013 | #DIV/0! | 0.015 | 0.035  | 0.014 | 0.020  | 0        | 0       | 32383    | 8607    | 1132      | 445      | 649       | 299      |
| 148.060 | 14.6 | L-Glutamate                             | 0.012 | 0.729   | 0.000 | 3.126  | 0.000 | 4.074  | 6482199  | 380682  | 4728757  | 420966  | 14779847  | 1102394  | 19265406  | 1522953  |
| 150.077 | 14.5 | 7-Methyladenine                         | 0.036 | 3.436   | 0.000 | 11.588 | 0.004 | 13.448 | 9522     | 938     | 32714    | 8183    | 379075    | 38392    | 439934    | 82464    |
| 152.107 | 18.9 | N-Methyltyramine                        | 0.016 | 1.425   | 0.417 | 3.077  | 0.161 | 0.780  | 23476    | 2639    | 33459    | 2141    | 102958    | 78463    | 26111     | 4204     |
| 157.061 | 10.9 | 4-Imidazolone-5-propanoate              | 0.000 | 9.527   | 0.019 | 0.462  | 0.040 | 0.512  | 18286    | 3831    | 174215   | 7350    | 80515     | 28065    | 89145     | 30977    |
| 159.076 | 16.0 | 4-Methylene-L-glutamine                 | 0.001 | 28.962  | 0.002 | 0.206  | 0.009 | 0.451  | 1218093  | 167358  | 35278398 | 4778695 | 7279878   | 627537   | 15896427  | 1190714  |
| 160.133 | 13.4 | DL-2-Aminooctanoicacid                  | 0.005 | 1.832   | 0.797 | 1.036  | 0.054 | 1.361  | 217498   | 15174   | 398489   | 41133   | 412671    | 34612    | 542168    | 50777    |
| 164.056 | 10.7 | Pterin                                  | 0.009 | 24.471  | 0.544 | 1.195  | 0.003 | 2.156  | 1919     | 233     | 46966    | 10735   | 56142     | 9882     | 101236    | 7397     |
| 165.054 | 4.5  | Phenylpyruvate                          | 0.009 | 0.604   | 0.082 | 90.809 | 0.020 | 30.119 | 6988     | 701     | 4221     | 429     | 383327    | 174786   | 127139    | 36506    |
| 165.054 | 25.0 | Phenylpyruvate                          | 0.034 | 0.715   | 0.446 | 1.294  | 0.371 | 5.589  | 30829    | 2038    | 22043    | 2870    | 28532     | 7469     | 123202    | 102923   |
| 166.072 | 12.8 | 3-Methylguanine                         | 0.000 | 66.900  | 0.001 | 2.155  | 0.000 | 3.805  | 38571    | 6156    | 2580387  | 269408  | 5561511   | 530733   | 9819280   | 981490   |
| 168.043 | 15.7 | Taurocyamine                            | 0.000 | 3.536   | 0.006 | 0.694  | 0.054 | 0.798  | 26327    | 3007    | 93082    | 5641    | 64580     | 6062     | 74324     | 6449     |
| 168.051 | 14.8 | 8-Hydroxyguanine                        | 0.003 | 3.194   | 0.424 | 0.830  | 0.428 | 0.810  | 33037    | 4715    | 105505   | 14607   | 87544     | 15834    | 85461     | 19291    |
| 173.021 | 15.7 | sn-Glycerol 3-phosphate                 | 0.002 | 12.756  | 0.005 | 0.289  | 0.006 | 0.331  | 8970     | 2370    | 114420   | 17566   | 33103     | 3973     | 37847     | 7133     |
| 173.092 | 14.5 | Glycylproline                           | 0.044 | 0.499   | 0.000 | 4.187  | 0.000 | 4.711  | 189552   | 25013   | 94509    | 32431   | 395692    | 29620    | 445249    | 48989    |
| 173.092 | 11.3 | Glycylproline                           | 0.013 | 3.899   | 0.013 | 0.269  | 0.016 | 0.297  | 4292     | 645     | 16732    | 3337    | 4501      | 856      | 4975      | 711      |
| 176.103 | 16.0 | L-Citrulline                            | 0.001 | 31.765  | 0.002 | 0.199  | 0.009 | 0.432  | 449346   | 63803   | 14273662 | 2011394 | 2846276   | 259729   | 6159273   | 510846   |
| 180.086 | 18.1 | D-Glucosamine                           | 0.000 | 6.336   | 0.000 | 0.210  | 0.000 | 0.148  | 9472     | 1181    | 60013    | 6101    | 12589     | 2680     | 8872      | 1000     |
| 184.060 | 13.7 | 4-Pyridoxate                            | 0.036 | 2.145   | 0.043 | 1.883  | 0.004 | 3.981  | 3155     | 433     | 6767     | 1282    | 12738     | 2137     | 26938     | 4146     |
| 184.060 | 9.9  | 4-Pyridoxate                            | 0.007 | 3.487   | 0.000 | 12.459 | 0.000 | 26.905 | 2956     | 497     | 10310    | 1754    | 128451    | 11091    | 277381    | 32755    |
| 184.073 | 15.0 | Choline phosphate                       | 0.001 | 2.530   | 0.000 | 2.827  | 0.001 | 2.582  | 19093971 | 1007907 | 48308694 | 4550459 | 136592330 | 11212892 | 124725545 | 11552476 |
| 184.073 | 4.3  | Choline phosphate                       | 0.001 | 1.880   | 0.142 | 0.665  | 0.369 | 0.913  | 4725171  | 204228  | 8884193  | 658519  | 5910741   | 1656643  | 8108957   | 489092   |
| 185.081 | 20.3 | 3-Methoxy-4-hydroxyphenylethyleneglycol | 0.030 | 1.479   | 0.036 | 0.655  | 0.126 | 0.726  | 34613    | 4458    | 51190    | 4819    | 33512     | 5468     | 37181     | 6779     |
| 185.128 | 18.3 | N-(3-acetamidopropyl) pyrrolidin-2-one  | 0.014 | 3.260   | 0.014 | 0.292  | 0.032 | 0.429  | 15883    | 4609    | 51781    | 10095   | 15130     | 2639     | 22233     | 1501     |

|         |      |                                                              |       |           |       |         |       |         |         |        |          |         |          |         |          |         |
|---------|------|--------------------------------------------------------------|-------|-----------|-------|---------|-------|---------|---------|--------|----------|---------|----------|---------|----------|---------|
| 186.112 | 9.7  | Ecgonine                                                     | 0.053 | 0.616     | 0.715 | 1.076   | 0.597 | 0.891   | 28743   | 3978   | 17708    | 2966    | 19060    | 2018    | 15780    | 1881    |
| 188.055 | 10.7 | 2-(Acetamidomethylene)succinate                              | 0.016 | #DIV/0!   | 0.001 | 9.431   | 0.001 | 12.793  | 0       | 0      | 2628     | 732     | 24784    | 3650    | 33618    | 4648    |
| 188.091 | 14.3 | [FA hydroxy(4:0)] N-(3S-hydroxy-butanoyl)-homoserine lactone | 0.053 | 2.075     | 0.073 | 6.045   | 0.018 | 8.052   | 11768   | 1058   | 24419    | 5019    | 147607   | 54428   | 196628   | 50091   |
| 188.103 | 14.0 | 5-guanidino-3-methyl-2-oxo-pentanoate                        | 0.037 | 0.572     | 0.000 | 5.320   | 0.001 | 7.948   | 221510  | 31011  | 126739   | 23563   | 674288   | 56572   | 1007317  | 125454  |
| 189.087 | 14.6 | N-Acetylglutamine                                            | 0.037 | 0.463     | 0.002 | 4.745   | 0.000 | 8.224   | 57685   | 10496  | 26681    | 6905    | 126609   | 18847   | 219427   | 24708   |
| 189.087 | 13.5 | N-Acetylglutamine                                            | 0.015 | 0.221     | 0.000 | 14.599  | 0.000 | 21.852  | 100526  | 21643  | 22266    | 3096    | 325069   | 26573   | 486564   | 49315   |
| 189.160 | 22.2 | N6,N6,N6-Trimethyl-L-lysine                                  | 0.016 | 1.776     | 0.990 | 0.998   | 0.134 | 1.268   | 1310533 | 118269 | 2327734  | 291525  | 2323237  | 180023  | 2951368  | 245653  |
| 190.089 | 4.7  | Prenyl-L-cysteine                                            | 0.010 | 2.869     | 0.000 | 2.488   | 0.000 | 3.414   | 372805  | 85942  | 1069737  | 180546  | 2661100  | 240793  | 3652242  | 317903  |
| 190.118 | 22.4 | L-Homocitrulline                                             | 0.000 | #DIV/0!   | 0.000 | 0.014   | 0.000 | 0.031   | 0       | 0      | 507549   | 56963   | 6931     | 2506    | 15971    | 2986    |
| 191.066 | 18.2 | Asp-Gly                                                      | 0.009 | #DIV/0!   | 0.009 | 0.013   | 0.009 | 0.006   | 0       | 0      | 34634    | 8373    | 437      | 282     | 206      | 206     |
| 191.114 | 22.5 | N-(omega)-Hydroxyarginine                                    | 0.001 | 18030.784 | 0.002 | 0.056   | 0.002 | 0.157   | 170     | 170    | 3066791  | 462685  | 170612   | 15143   | 481033   | 50586   |
| 195.065 | 4.5  | Ferulate                                                     | 0.031 | 0.000     | 0.001 | #DIV/0! | 0.000 | #DIV/0! | 1990    | 672    | 0        | 0       | 864276   | 123060  | 140846   | 10027   |
| 196.083 | 9.9  | 2-Amino-4-hydroxy-6-hydroxymethyl-7,8-dihydropteridine       | 0.000 | 4.887     | 0.006 | 1.763   | 0.069 | 1.146   | 101575  | 5467   | 496399   | 29005   | 875386   | 87096   | 569055   | 19774   |
| 196.083 | 12.8 | 2-Amino-4-hydroxy-6-hydroxymethyl-7,8-dihydropteridine       | 0.003 | 74.610    | 0.001 | 3.399   | 0.000 | 4.533   | 1198    | 386    | 89413    | 16929   | 303952   | 37096   | 405285   | 42116   |
| 196.979 | 15.0 | tetranitromethane                                            | 0.002 | #DIV/0!   | 0.001 | 3.078   | 0.000 | 2.688   | 0       | 0      | 57668    | 10100   | 177495   | 19416   | 155004   | 14913   |
| 197.044 | 13.1 | 3-(3,4-Dihydroxyphenyl)pyruvate                              | 0.041 | 3.518     | 0.026 | 0.184   | 0.168 | 0.501   | 12061   | 2688   | 42433    | 11173   | 7788     | 2963    | 21250    | 8716    |
| 198.027 | 16.3 | Phosphoguanidinoacetate                                      | 0.002 | 0.165     | 0.000 | 129.853 | 0.000 | 180.746 | 2488    | 272    | 410      | 410     | 53244    | 5413    | 74111    | 8363    |
| 198.052 | 15.7 | 2-Amino-5-phosphopentanoic acid                              | 0.002 | 11.538    | 0.006 | 0.313   | 0.009 | 0.364   | 23758   | 4547   | 274120   | 43928   | 85934    | 14286   | 99864    | 16149   |
| 203.085 | 4.9  | Pyrene                                                       | 0.019 | 5.515     | 0.065 | 1.691   | 0.006 | 2.559   | 7014    | 2394   | 38683    | 9429    | 65425    | 8798    | 98998    | 13895   |
| 203.091 | 18.2 | Diethyl 2-methyl-3-oxosuccinate                              | 0.011 | 16.732    | 0.011 | 0.060   | 0.015 | 0.170   | 23631   | 4362   | 395388   | 93519   | 23635    | 4003    | 67363    | 40850   |
| 203.106 | 9.6  | Tremetone                                                    | 0.044 | 1.377     | 0.046 | 0.689   | 0.437 | 2.656   | 12352   | 1433   | 17014    | 1434    | 11716    | 1813    | 45192    | 33322   |
| 203.139 | 12.7 | Leu-Ala                                                      | 0.002 | 3.235     | 0.473 | 1.202   | 0.206 | 1.474   | 19420   | 3605   | 62820    | 7978    | 75500    | 14775   | 92594    | 19644   |
| 204.086 | 16.7 | N2-Acetyl-L-aminoadipate                                     | 0.007 | 0.643     | 0.034 | 1.671   | 0.451 | 1.168   | 27899   | 2255   | 17937    | 1808    | 29981    | 4187    | 20944    | 3329    |
| 204.123 | 11.1 | O-Acetylcarnitine                                            | 0.000 | 4.658     | 0.002 | 0.490   | 0.002 | 0.483   | 7457687 | 389792 | 34740410 | 3303631 | 17032660 | 1589381 | 16764317 | 1664448 |
| 205.035 | 16.0 | Oxaloglutarate                                               | 0.001 | 2.345     | 0.274 | 0.858   | 0.984 | 1.003   | 114892  | 5161   | 269379   | 25193   | 231111   | 21324   | 270170   | 29803   |
| 205.082 | 15.2 | Glu-Gly                                                      | 0.000 | 4.640     | 0.000 | 3.873   | 0.019 | 2.299   | 17088   | 2574   | 79283    | 7479    | 307098   | 24642   | 182310   | 30486   |
| 205.119 | 11.1 | Triethylenemelamine                                          | 0.000 | 15.754    | 0.001 | 0.363   | 0.001 | 0.175   | 4498    | 1355   | 70857    | 7964    | 25725    | 4026    | 12418    | 1814    |
| 205.122 | 4.8  | 4'-Hydroxy-3'-prenylacetophenone                             | 0.027 | 0.615     | 0.440 | 1.245   | 0.698 | 1.102   | 57863   | 6250   | 35589    | 5931    | 44324    | 9024    | 39224    | 6884    |
| 206.102 | 11.8 | N-Acetyl-D-fucosamine                                        | 0.020 | 3.623     | 0.606 | 1.437   | 0.444 | 1.667   | 10604   | 1750   | 38422    | 8320    | 55198    | 29601   | 64058    | 30057   |
| 207.112 | 9.3  | Phenylethylmalonamide                                        | 0.013 | 0.248     | 0.002 | 6.065   | 0.002 | 8.219   | 49152   | 10064  | 12200    | 2609    | 73997    | 10778   | 100267   | 15308   |
| 208.060 | 4.1  | 4-(2-Aminophenyl)-2,4-dioxobutanoate                         | 0.000 | 0.449     | 0.973 | 0.992   | 0.196 | 0.766   | 1117780 | 74847  | 501402   | 61822   | 497640   | 87843   | 384094   | 57787   |
| 208.108 | 4.9  | NNK (carcinogen)                                             | 0.044 | 2.253     | 0.018 | 0.287   | 0.458 | 2.940   | 35210   | 4966   | 79325    | 16563   | 22745    | 3764    | 233209   | 191058  |
| 209.117 | 4.9  | Benzyl (2R,3S)-2-methyl-3-hydroxybutanoate                   | 0.038 | 0.381     | 0.054 | 2.297   | 0.002 | 2.727   | 508306  | 109609 | 193901   | 62890   | 445323   | 93961   | 528839   | 33514   |
| 209.153 | 4.6  | 4-Heptyloxyphenol                                            | 0.028 | 0.312     | 0.794 | 0.912   | 0.326 | 1.948   | 553022  | 125491 | 172457   | 39608   | 157321   | 40109   | 335990   | 147117  |

|         |      |                                                     |       |         |       |         |       |         |         |        |         |        |         |        |         |        |
|---------|------|-----------------------------------------------------|-------|---------|-------|---------|-------|---------|---------|--------|---------|--------|---------|--------|---------|--------|
| 210.087 | 15.7 | 4-Acetamido-2-amino-6-nitrotoluene                  | 0.002 | 4.975   | 0.003 | 0.318   | 0.003 | 0.351   | 19610   | 2718   | 97561   | 13160  | 30995   | 5285   | 34279   | 6538   |
| 212.043 | 15.1 | Phosphocreatine                                     | 0.001 | 2.157   | 0.006 | 1.768   | 0.002 | 2.739   | 1258829 | 58591  | 2715413 | 204187 | 4801520 | 493383 | 7436482 | 802800 |
| 213.040 | 15.1 | 2-Hydroxy-6-ketononatrienedioate                    | 0.045 | 3.264   | 0.046 | 3.251   | 0.004 | 5.844   | 2469    | 379    | 8059    | 2105   | 26197   | 6897   | 47097   | 8127   |
| 213.098 | 14.9 | Gly-His                                             | 0.028 | 0.526   | 0.939 | 1.028   | 0.226 | 1.988   | 682575  | 89034  | 358937  | 89879  | 369063  | 93686  | 713542  | 248429 |
| 213.098 | 15.7 | Gly-His                                             | 0.019 | 9.536   | 0.027 | 0.183   | 0.028 | 0.193   | 271225  | 67664  | 2586349 | 681376 | 472051  | 16722  | 498922  | 85059  |
| 213.098 | 18.1 | Gly-His                                             | 0.026 | 6.947   | 0.045 | 0.272   | 0.030 | 0.175   | 215552  | 33084  | 1497475 | 411126 | 407471  | 60256  | 262126  | 40734  |
| 213.123 | 4.9  | Pro-Pro                                             | 0.009 | 1.758   | 0.090 | 1.915   | 0.008 | 2.153   | 10681   | 1800   | 18774   | 1729   | 35956   | 8174   | 40425   | 5361   |
| 216.063 | 15.7 | sn-glycero-3-Phosphoethanolamine                    | 0.002 | 8.118   | 0.006 | 0.332   | 0.008 | 0.372   | 248967  | 19873  | 2021113 | 309525 | 671127  | 81293  | 752044  | 113076 |
| 217.082 | 15.8 | N3-(4-methoxyfumaryl)-L-2,3-diaminopropanoate       | 0.049 | 1.419   | 0.022 | 0.609   | 0.469 | 1.225   | 18198   | 1943   | 25818   | 2727   | 15728   | 2526   | 31622   | 7028   |
| 217.155 | 4.9  | Val-Val                                             | 0.002 | 0.461   | 0.333 | 0.811   | 0.005 | 1.735   | 72618   | 7575   | 33452   | 3632   | 27127   | 5005   | 58040   | 5484   |
| 218.138 | 9.9  | O-Propanoylcarnitine                                | 0.000 | 0.321   | 0.000 | 2.871   | 0.000 | 2.967   | 1631658 | 83215  | 523810  | 70611  | 1503739 | 144235 | 1554160 | 151688 |
| 218.186 | 27.5 | Deoxyhypusine                                       | 0.029 | 11.573  | 0.459 | 1.611   | 0.044 | 2.234   | 31451   | 6818   | 363992  | 109220 | 586484  | 261081 | 813301  | 156923 |
| 219.080 | 4.8  | Cys-Pro                                             | 0.000 | 4.449   | 0.003 | 2.697   | 0.000 | 4.054   | 8604    | 2045   | 38278   | 3891   | 103230  | 13203  | 155197  | 13566  |
| 219.097 | 14.6 | L-Ala-L-Glu                                         | 0.000 | 47.907  | 0.000 | 0.328   | 0.000 | 0.204   | 5623    | 1258   | 269364  | 19163  | 88364   | 13852  | 55036   | 5825   |
| 219.097 | 9.9  | L-Ala-L-Glu                                         | 0.001 | 162.066 | 0.001 | 9.411   | 0.001 | 17.837  | 188     | 188    | 30505   | 4785   | 287067  | 36380  | 544097  | 65202  |
| 219.122 | 13.0 | 3-Hydroxysebacicacid                                | 0.043 | 1.719   | 0.041 | 0.597   | 0.444 | 3.271   | 43354   | 8393   | 74518   | 10393  | 44516   | 6971   | 243746  | 203272 |
| 219.138 | 9.9  | [FA (14:5)] 5,7,9,11,13-tetradecapentaenoic acid    | 0.006 | 0.052   | 0.001 | 20.746  | 0.009 | 15.503  | 436639  | 91331  | 22617   | 3077   | 469204  | 70466  | 350631  | 78360  |
| 220.081 | 13.7 | O-Succinyl-L-homoserine                             | 0.009 | 8.035   | 0.003 | 4.086   | 0.000 | 7.641   | 995     | 329    | 7995    | 1731   | 32668   | 4875   | 61091   | 5840   |
| 221.096 | 4.3  | Met-Ala                                             | 0.000 | 0.096   | 0.382 | 2.692   | 0.219 | 2.435   | 1381041 | 52851  | 132827  | 34636  | 357567  | 232665 | 323440  | 133612 |
| 221.153 | 9.9  | Oblongolide                                         | 0.001 | 1.603   | 0.367 | 2.601   | 0.032 | 0.716   | 18766   | 923    | 30074   | 1938   | 78232   | 48489  | 21522   | 2754   |
| 222.097 | 13.9 | N-Acetyl-D-glucosamine                              | 0.003 | 9.945   | 0.071 | 0.578   | 0.246 | 0.742   | 6092    | 1218   | 60589   | 10457  | 34994   | 6665   | 44933   | 7001   |
| 222.098 | 12.7 | N-Acetyl-D-glucosamine                              | 0.018 | 21.617  | 0.000 | 5.012   | 0.003 | 6.840   | 873     | 392    | 18878   | 5220   | 94619   | 10274  | 129131  | 21198  |
| 223.111 | 4.3  | S-Butyl-DL-homocysteine-[S,R]-sulfoximine           | 0.001 | 0.193   | 0.615 | 1.503   | 0.840 | 1.209   | 1592759 | 50803  | 306745  | 191035 | 461027  | 227398 | 370791  | 241928 |
| 224.164 | 27.4 | Tigloidine                                          | 0.005 | 0.682   | 0.388 | 3.150   | 0.207 | 0.838   | 49949   | 1890   | 34083   | 3606   | 107377  | 77450  | 28563   | 1676   |
| 224.164 | 21.8 | Tigloidine                                          | 0.040 | 0.479   | 0.116 | 1.572   | 0.358 | 7.830   | 55377   | 10497  | 26510   | 2978   | 41667   | 7791   | 207588  | 178705 |
| 224.164 | 8.5  | Tigloidine                                          | 0.050 | 2.038   | 0.183 | 0.615   | 0.042 | 0.464   | 23351   | 2871   | 47591   | 9431   | 29272   | 8632   | 22097   | 2954   |
| 225.148 | 21.1 | [FA] Methyl jasmonate                               | 0.038 | 1.447   | 0.618 | 0.913   | 0.390 | 4.901   | 23313   | 2250   | 33737   | 3594   | 30818   | 4373   | 165340  | 139825 |
| 227.113 | 15.7 | Carnosine                                           | 0.003 | 4.115   | 0.006 | 0.378   | 0.008 | 0.422   | 143396  | 16446  | 590020  | 83364  | 223227  | 24296  | 248961  | 27413  |
| 228.098 | 9.7  | Deoxycytidine                                       | 0.006 | 5.061   | 0.172 | 1.391   | 0.000 | 2.593   | 12845   | 8013   | 65009   | 12000  | 90451   | 12461  | 168556  | 9884   |
| 228.128 | 7.5  | ametryn                                             | 0.017 | 0.289   | 0.073 | 2.030   | 0.032 | 6.734   | 10555   | 2186   | 3052    | 726    | 6196    | 1327   | 20554   | 5978   |
| 229.070 | 10.7 | 2-Hydroxy-3-carboxy-6-oxo-7-methylocta-2,4-dienoate | 0.003 | 6.122   | 0.000 | 107.289 | 0.000 | 122.692 | 263     | 263    | 1613    | 86     | 173044  | 17297  | 197887  | 18483  |
| 229.101 | 4.3  | Chrysene                                            | 0.009 | 0.211   | 0.095 | 1.775   | 0.650 | 1.222   | 29161   | 5865   | 6147    | 2275   | 10913   | 855    | 7512    | 1824   |
| 229.101 | 10.7 | Chrysene                                            | 0.003 | 2.631   | 0.900 | 1.044   | 0.100 | 1.753   | 4251    | 1069   | 11183   | 1395   | 11670   | 3468   | 19607   | 4129   |
| 229.118 | 14.3 | (S)-ATPA                                            | 0.017 | 0.282   | 0.101 | 2.846   | 0.014 | 4.943   | 689018  | 141215 | 194461  | 24932  | 553502  | 178568 | 961314  | 208129 |

|         |      |                                                                                |       |         |       |        |       |        |        |        |         |         |         |        |         |        |
|---------|------|--------------------------------------------------------------------------------|-------|---------|-------|--------|-------|--------|--------|--------|---------|---------|---------|--------|---------|--------|
| 229.179 | 4.5  | [FA oxo(13:0)] 2-oxo-tridecanoic acid                                          | 0.050 | 0.313   | 0.975 | 0.993  | 0.801 | 1.161  | 48813  | 13059  | 15272   | 2562    | 15169   | 1892   | 17729   | 8946   |
| 230.095 | 14.9 | Ergothioneine                                                                  | 0.001 | 2.602   | 0.683 | 1.061  | 0.140 | 1.260  | 168991 | 10845  | 439734  | 38205   | 466706  | 51180  | 554111  | 59028  |
| 230.247 | 14.6 | [SP (14:0)] 1-deoxy-tetradecasphinganine                                       | 0.039 | 0.611   | 0.327 | 4.647  | 0.645 | 1.154  | 83344  | 8642   | 50963   | 10482   | 236838  | 171019 | 58812   | 12764  |
| 231.032 | 15.1 | hydroxyphenylpropionic acid sulfate                                            | 0.022 | 0.513   | 0.227 | 0.625  | 0.043 | 0.569  | 68863  | 10401  | 35302   | 5417    | 22066   | 8580   | 20099   | 3324   |
| 232.083 | 14.2 | N-Succinyl-L-glutamate 5-semialdehyde                                          | 0.001 | 2.585   | 0.271 | 1.174  | 0.099 | 1.265  | 22372  | 2919   | 57832   | 5507    | 67920   | 6649   | 73164   | 6342   |
| 232.154 | 8.9  | O-Butanoylcarnitine                                                            | 0.026 | 1.662   | 0.045 | 0.663  | 0.134 | 0.740  | 242970 | 31504  | 403713  | 50280   | 267614  | 25948  | 298790  | 39593  |
| 234.077 | 15.6 | 2-Hydroxy-6-oxo-(2'-aminophenyl)-hexa-2,4-dienoate                             | 0.030 | 6.614   | 0.059 | 0.310  | 0.153 | 0.520  | 870689 | 100868 | 5759028 | 1633487 | 1785233 | 369258 | 2995614 | 260938 |
| 234.077 | 18.1 | 2-Hydroxy-6-oxo-(2'-aminophenyl)-hexa-2,4-dienoate                             | 0.001 | 9.505   | 0.004 | 0.386  | 0.005 | 0.407  | 558581 | 96714  | 5309372 | 700032  | 2052066 | 268146 | 2161004 | 453547 |
| 235.027 | 17.0 | trihydroxy phenylethanol sulfate isomer                                        | 0.028 | #DIV/0! | 0.000 | 13.547 | 0.001 | 20.606 | 0      | 0      | 4493    | 1465    | 60863   | 6699   | 92577   | 12990  |
| 235.092 | 18.0 | Glu-Ser                                                                        | 0.006 | 12.149  | 0.006 | 0.116  | 0.007 | 0.134  | 2916   | 501    | 35423   | 6990    | 4098    | 516    | 4762    | 752    |
| 235.205 | 24.4 | [FA (16:3)] 4,6,11-hexadecatrienal                                             | 0.000 | 0.461   | 0.136 | 1.384  | 0.010 | 1.337  | 34446  | 2516   | 15872   | 1150    | 21963   | 3365   | 21229   | 1245   |
| 236.998 | 18.2 | Fenpiclonil                                                                    | 0.000 | 96.673  | 0.000 | 0.189  | 0.000 | 0.122  | 26936  | 4843   | 2603994 | 166296  | 492373  | 46838  | 316416  | 32605  |
| 237.148 | 4.4  | 4-Heptyloxybenzoic acid                                                        | 0.029 | 0.190   | 0.117 | 1.780  | 0.145 | 1.818  | 235369 | 62873  | 44714   | 6962    | 79609   | 17974  | 81306   | 20752  |
| 237.148 | 20.4 | 4-Heptyloxybenzoic acid                                                        | 0.007 | 1.671   | 0.894 | 1.029  | 0.373 | 0.857  | 21665  | 2176   | 36201   | 3519    | 37244   | 6685   | 31017   | 4288   |
| 237.221 | 3.9  | [FA (16:2)] 6,11-hexadecadienal                                                | 0.033 | 0.516   | 0.000 | 32.606 | 0.000 | 20.986 | 26986  | 4505   | 13936   | 1055    | 454383  | 28727  | 292449  | 18325  |
| 239.114 | 22.1 | quinonoid dihydro-(6H)-biopterin                                               | 0.004 | 0.511   | 0.045 | 0.441  | 0.518 | 1.178  | 191287 | 9142   | 97774   | 19911   | 43082   | 11460  | 115200  | 16676  |
| 239.164 | 17.1 | [FA oxo(5:1/5:0/4:0)] (1R,2R)-3-oxo-2-(2'Z-pentenyl)-cyclopentanebutanoic acid | 0.003 | 1.522   | 0.319 | 1.241  | 0.369 | 4.565  | 19770  | 2126   | 30080   | 1020    | 37336   | 6518   | 137308  | 108530 |
| 240.109 | 12.8 | Dihydrobiopterin                                                               | 0.001 | 27.752  | 0.002 | 2.914  | 0.001 | 4.008  | 20376  | 2647   | 565488  | 69389   | 1647779 | 200055 | 2266251 | 245462 |
| 241.031 | 16.1 | L-Cystine                                                                      | 0.009 | 0.492   | 0.005 | 0.108  | 0.005 | 0.159  | 420341 | 52174  | 206817  | 38726   | 22406   | 4447   | 32784   | 14700  |
| 241.129 | 14.3 | Homocarnosine                                                                  | 0.003 | 2.860   | 0.152 | 1.377  | 0.000 | 2.594  | 15580  | 2446   | 44560   | 5712    | 61376   | 9022   | 115578  | 8411   |
| 241.154 | 12.9 | Slaframine                                                                     | 0.003 | 0.475   | 0.226 | 1.681  | 0.209 | 1.691  | 140523 | 15552  | 66783   | 9700    | 112231  | 32221  | 112916  | 31316  |
| 241.154 | 24.5 | Slaframine                                                                     | 0.051 | 0.635   | 0.334 | 6.951  | 0.670 | 1.151  | 44593  | 4467   | 28324   | 5742    | 196886  | 157488 | 32597   | 7815   |
| 241.179 | 15.9 | [FA oxo(5:2/5:0/4:0)] (1S,2S)-3-oxo-2-pentyl-cyclopentanebutanoic acid         | 0.027 | 0.663   | 0.850 | 1.045  | 0.166 | 1.207  | 36113  | 3956   | 23932   | 1831    | 24999   | 5099   | 28892   | 2728   |
| 242.113 | 9.5  | 5-Methyl-2'-deoxycytidine                                                      | 0.044 | 1.574   | 0.038 | 2.053  | 0.010 | 3.633  | 3832   | 427    | 6034    | 806     | 12386   | 2278   | 21922   | 4039   |
| 242.175 | 17.2 | Valeroidine                                                                    | 0.018 | 0.651   | 0.111 | 1.396  | 0.095 | 1.346  | 20791  | 1833   | 13543   | 1785    | 18912   | 2465   | 18235   | 1807   |
| 243.101 | 4.0  | Equol                                                                          | 0.044 | 0.057   | 0.000 | 55.063 | 0.004 | 54.359 | 2957   | 1047   | 168     | 168     | 9265    | 1140   | 9147    | 1833   |
| 243.159 | 26.7 | 2-isocapryloyl-3R-hydroxymethyl-&gamma;-butyrolactone                          | 0.011 | 1.488   | 0.030 | 0.659  | 0.332 | 0.853  | 17906  | 778    | 26643   | 2320    | 17545   | 2740   | 22718   | 3050   |
| 243.159 | 8.5  | 2-isocapryloyl-3R-hydroxymethyl-&gamma;-butyrolactone                          | 0.033 | 0.651   | 0.552 | 1.146  | 0.385 | 2.672  | 21328  | 2201   | 13881   | 2048    | 15909   | 2577   | 37096   | 24331  |
| 245.059 | 14.2 | penem CGP31608                                                                 | 0.000 | 4.508   | 0.001 | 7.592  | 0.000 | 9.956  | 41053  | 3458   | 185085  | 11345   | 1405138 | 156830 | 1842771 | 200141 |
| 245.059 | 12.9 | penem CGP31608                                                                 | 0.003 | 6.589   | 0.000 | 26.567 | 0.000 | 36.561 | 2145   | 735    | 14134   | 2322    | 375494  | 36177  | 516760  | 52969  |
| 245.149 | 10.9 | N-hexenoylglutamine                                                            | 0.008 | 2.240   | 0.661 | 1.151  | 0.448 | 1.296  | 16709  | 2795   | 37424   | 5176    | 43076   | 11219  | 48497   | 12703  |
| 246.170 | 8.1  | N-(octanoyl)-L-homoserine                                                      | 0.004 | 1.425   | 0.002 | 0.672  | 0.001 | 0.630  | 241734 | 17310  | 344487  | 21279   | 231620  | 15105  | 217136  | 12154  |
| 247.054 | 14.2 | dihydrocamalexate                                                              | 0.011 | #DIV/0! | 0.001 | 24.495 | 0.001 | 38.842 | 0      | 0      | 1502    | 379     | 36800   | 5013   | 58353   | 8437   |

|         |      |                                                        |       |         |       |        |       |        |           |         |           |          |           |          |           |          |
|---------|------|--------------------------------------------------------|-------|---------|-------|--------|-------|--------|-----------|---------|-----------|----------|-----------|----------|-----------|----------|
| 247.111 | 4.3  | Met-Pro                                                | 0.009 | 0.252   | 0.163 | 1.593  | 0.542 | 0.768  | 105638    | 19858   | 26625     | 8944     | 42409     | 4994     | 20454     | 3437     |
| 247.129 | 12.4 | Glu-Val                                                | 0.002 | 3.967   | 0.913 | 0.981  | 0.327 | 0.798  | 23388     | 3063    | 92787     | 11770    | 91052     | 9964     | 74048     | 13814    |
| 247.140 | 14.3 | N2-(D-1-Carboxyethyl)-L-arginine                       | 0.002 | 4.929   | 0.000 | 6.081  | 0.000 | 10.833 | 106169    | 22957   | 523354    | 72330    | 3182756   | 308356   | 5669642   | 537848   |
| 248.149 | 11.5 | Hydroxybutyrylcarnitine                                | 0.000 | 7.752   | 0.001 | 0.346  | 0.001 | 0.367  | 30241     | 3209    | 234410    | 21837    | 81018     | 7000     | 85957     | 8733     |
| 249.127 | 4.6  | Met-Val                                                | 0.009 | 0.508   | 0.151 | 1.523  | 0.101 | 1.698  | 39636     | 3239    | 20133     | 4849     | 30653     | 4722     | 34188     | 6033     |
| 249.221 | 4.1  | [FA (17:3)] 8Z,11Z,14Z-heptadecatrienal                | 0.004 | 0.450   | 0.000 | 36.226 | 0.001 | 71.177 | 12600     | 1453    | 5669      | 517      | 205370    | 17413    | 403510    | 55011    |
| 250.093 | 16.5 | S-Acetyldihydrolipoamide                               | 0.002 | 13.455  | 0.001 | 2.313  | 0.001 | 3.498  | 91354     | 5882    | 1229164   | 181828   | 2842820   | 294649   | 4300168   | 467411   |
| 250.093 | 7.9  | S-Acetyldihydrolipoamide                               | 0.027 | 7.498   | 0.005 | 3.275  | 0.008 | 2.908  | 2679      | 902     | 20083     | 5667     | 65781     | 10489    | 58405     | 9392     |
| 251.054 | 17.2 | 2-Hydroxy-6-oxo-6-(2-hydroxyphenoxy)-hexa-2,4-dienoate | 0.000 | 3.642   | 0.079 | 1.937  | 0.088 | 1.824  | 4622      | 715     | 16834     | 1499     | 32606     | 7155     | 30711     | 6538     |
| 251.069 | 14.1 | gamma-L-Glutamyl-L-cysteine                            | 0.001 | 14.204  | 0.000 | 8.063  | 0.001 | 14.927 | 7116      | 1201    | 101077    | 12701    | 815024    | 89310    | 1508823   | 180846   |
| 251.106 | 4.0  | Met-Thr                                                | 0.034 | 0.455   | 0.003 | 18.217 | 0.003 | 58.776 | 8839      | 1630    | 4020      | 974      | 73223     | 12471    | 236256    | 42487    |
| 251.143 | 4.3  | (R)-4'-Deoxyindenestrol                                | 0.000 | 0.115   | 0.004 | 7.071  | 0.034 | 3.750  | 1475621   | 57312   | 170071    | 37342    | 1202620   | 213238   | 637737    | 162078   |
| 251.164 | 20.8 | Xanthoxin                                              | 0.020 | 1.993   | 0.113 | 6.517  | 0.271 | 3.352  | 22307     | 3344    | 44447     | 6663     | 289653    | 127468   | 148971    | 84429    |
| 252.109 | 8.3  | Muramic acid                                           | 0.004 | 2.651   | 0.043 | 0.636  | 0.464 | 1.127  | 62242     | 7352    | 165003    | 21840    | 104874    | 11562    | 185978    | 16644    |
| 253.067 | 18.1 | Met-Cys                                                | 0.025 | #DIV/0! | 0.026 | 0.017  | 0.025 | 0.000  | 0         | 0       | 28470     | 8993     | 484       | 306      | 0         | 0        |
| 253.122 | 4.0  | cis-Hinokiresinol                                      | 0.007 | 0.540   | 0.001 | 2.434  | 0.038 | 1.765  | 106483    | 11354   | 57481     | 8939     | 139882    | 13225    | 101438    | 15252    |
| 253.144 | 9.7  | ubiquinol-1                                            | 0.036 | 9.683   | 0.038 | 0.119  | 0.033 | 0.083  | 26606     | 3494    | 257634    | 80985    | 30677     | 5540     | 21364     | 4435     |
| 253.216 | 4.0  | [FA (16:2)] 9,12-hexadecadienoic acid                  | 0.032 | 0.540   | 0.686 | 0.915  | 0.760 | 1.090  | 158338    | 24631   | 85511     | 12984    | 78232     | 11705    | 93167     | 20464    |
| 255.097 | 24.3 | N-Ribosylnicotinamide                                  | 0.008 | 8.968   | 0.013 | 4.839  | 0.136 | 2.668  | 2217      | 254     | 19880     | 4199     | 96189     | 20505    | 53035     | 18520    |
| 255.231 | 16.8 | (9Z)-Hexadecenoic acid                                 | 0.041 | 0.516   | 0.558 | 1.154  | 0.840 | 0.927  | 55912     | 9414    | 28824     | 6175     | 33265     | 3855     | 26711     | 8085     |
| 256.030 | 18.2 | Pronamide                                              | 0.000 | #DIV/0! | 0.000 | 0.034  | 0.000 | 0.012  | 0         | 0       | 108502    | 8698     | 3743      | 856      | 1317      | 478      |
| 258.110 | 14.5 | sn-glycero-3-Phosphocholine                            | 0.000 | 5.060   | 0.001 | 0.427  | 0.001 | 0.400  | 154140356 | 8190520 | 779997098 | 71953535 | 332676294 | 34133894 | 311927335 | 32216331 |
| 259.092 | 12.7 | (1-Ribosylimidazole)-4-acetate                         | 0.004 | 2.981   | 0.000 | 4.365  | 0.001 | 3.943  | 19026     | 2832    | 56714     | 8137     | 247567    | 19018    | 223618    | 24043    |
| 260.113 | 14.5 | Proacacipetalin                                        | 0.000 | 5.233   | 0.001 | 0.412  | 0.001 | 0.385  | 1588049   | 88040   | 8310740   | 761434   | 3420262   | 343255   | 3201530   | 328765   |
| 260.197 | 20.5 | Leu-Lys                                                | 0.000 | 0.500   | 0.221 | 1.198  | 0.353 | 1.155  | 517854    | 17899   | 258772    | 29806    | 309963    | 25434    | 298898    | 28370    |
| 261.148 | 10.8 | Laciniene C 7-methyl ether                             | 0.023 | 3.709   | 0.490 | 0.793  | 0.142 | 0.532  | 120506    | 69498   | 446989    | 97204    | 354273    | 85201    | 237681    | 88342    |
| 262.103 | 15.8 | Ala-Asp-Gly                                            | 0.008 | 3.427   | 0.006 | 1.992  | 0.020 | 1.683  | 35266     | 7246    | 120869    | 20802    | 240826    | 26515    | 203393    | 21421    |
| 265.111 | 21.0 | 2-(6'-methylthio)hexylmalate                           | 0.040 | 1.707   | 0.048 | 1.426  | 0.170 | 1.299  | 993775    | 102785  | 1696732   | 255159   | 2419001   | 187043   | 2203439   | 228529   |
| 265.252 | 3.8  | [FA (18:2)] 9,12-octadecadienal                        | 0.016 | 6.187   | 0.000 | 3.001  | 0.677 | 1.172  | 17369     | 2791    | 107455    | 25447    | 322514    | 31573    | 125884    | 34462    |
| 266.095 | 14.5 | Albendazole                                            | 0.001 | 147.364 | 0.001 | 0.097  | 0.002 | 0.072  | 2952      | 1955    | 435001    | 66402    | 42309     | 19378    | 31235     | 8397     |
| 266.138 | 8.4  | N(alpha)-Benzyloxycarbonyl-L-leucine                   | 0.009 | 2.273   | 0.484 | 1.146  | 0.287 | 1.268  | 18470     | 1959    | 41985     | 5869     | 48107     | 6052     | 53257     | 8051     |
| 267.119 | 18.2 | 5'-amino-5'-deoxyadenosine                             | 0.024 | 10.102  | 0.055 | 0.297  | 0.035 | 0.193  | 7151      | 1197    | 72245     | 20362    | 21436     | 4981     | 13910     | 2684     |
| 267.195 | 4.2  | [PR] Juvenile hormone III                              | 0.022 | 0.104   | 0.166 | 5.781  | 0.058 | 10.988 | 609474    | 166518  | 63126     | 12055    | 364952    | 186207   | 693613    | 257972   |
| 269.044 | 18.1 | Coumestrol                                             | 0.001 | #DIV/0! | 0.001 | 0.015  | 0.001 | 0.004  | 0         | 0       | 68536     | 9884     | 1050      | 347      | 299       | 299      |

|         |      |                                                                           |       |         |       |          |       |         |         |        |          |         |          |        |          |        |
|---------|------|---------------------------------------------------------------------------|-------|---------|-------|----------|-------|---------|---------|--------|----------|---------|----------|--------|----------|--------|
| 269.080 | 4.0  | Homolanthionine                                                           | 0.033 | 0.253   | 0.002 | 1403.812 | 0.002 | 671.782 | 2951    | 758    | 746      | 341     | 1047492  | 166929 | 501268   | 82381  |
| 269.099 | 18.2 | 8-Azaadenosine                                                            | 0.007 | 12.508  | 0.012 | 0.205    | 0.011 | 0.166   | 3446    | 485    | 43098    | 9118    | 8820     | 2036   | 7158     | 1118   |
| 269.174 | 10.1 | dihydroartemisinic acid hydroperoxide                                     | 0.042 | 0.703   | 0.062 | 1.696    | 0.315 | 2.713   | 54350   | 5759   | 38208    | 3477    | 64798    | 11049  | 103641   | 58487  |
| 272.078 | 7.6  | hydroxypyridine glucuronide                                               | 0.035 | #DIV/0! | 0.001 | 9.241    | 0.006 | 8.401   | 0       | 0      | 4354     | 1521    | 40231    | 5506   | 36574    | 7307   |
| 272.221 | 4.4  | Tridecanoylglycine                                                        | 0.051 | 0.138   | 0.116 | 1.828    | 0.311 | 8.215   | 224624  | 75805  | 31079    | 7756    | 56802    | 12468  | 255321   | 198884 |
| 273.036 | 16.3 | &alpha;-(2,6-anhydro-3-deoxy-D-arabino-heptulopyranosid)onate 7-phosphate | 0.003 | #DIV/0! | 0.745 | 0.909    | 0.014 | 1.981   | 0       | 0      | 31497    | 6011    | 28633    | 6119   | 62404    | 8211   |
| 273.091 | 5.1  | Thienamycin                                                               | 0.013 | 2.912   | 0.232 | 1.389    | 0.204 | 1.479   | 4726    | 747    | 13762    | 2455    | 19110    | 3376   | 20358    | 4100   |
| 275.134 | 15.4 | ala-gly-ala-gly                                                           | 0.017 | 3.211   | 0.000 | 38.341   | 0.000 | 88.965  | 1237    | 277    | 3971     | 794     | 152268   | 15712  | 353320   | 30305  |
| 276.155 | 17.1 | L-a-glutamyl-L-Lysine                                                     | 0.013 | 0.668   | 0.505 | 0.878    | 0.353 | 1.205   | 195684  | 8588   | 130673   | 18005   | 114668   | 14436  | 157463   | 20743  |
| 276.180 | 9.2  | [FA hydroxy(10:0)] N-(3S-hydroxydecanoyl)-L-serine                        | 0.004 | 11.884  | 0.004 | 0.091    | 0.005 | 0.124   | 4215    | 576    | 50089    | 9046    | 4537     | 725    | 6195     | 912    |
| 278.024 | 18.1 | Fenitrothion                                                              | 0.014 | #DIV/0! | 0.019 | 0.076    | 0.016 | 0.036   | 0       | 0      | 59654    | 16170   | 4541     | 1209   | 2139     | 723    |
| 278.105 | 14.2 | Metazachlor                                                               | 0.037 | #DIV/0! | 0.020 | 7.331    | 0.008 | 11.738  | 0       | 0      | 5060     | 1789    | 37093    | 9572   | 59391    | 12778  |
| 279.137 | 4.1  | Pantetheine                                                               | 0.025 | 0.310   | 0.258 | 1.846    | 0.340 | 1.601   | 54111   | 11976  | 16800    | 5685    | 31015    | 10165  | 26893    | 8245   |
| 281.247 | 4.0  | Linoleate                                                                 | 0.019 | 0.208   | 0.093 | 3.153    | 0.223 | 1.398   | 656686  | 152214 | 136691   | 20149   | 430949   | 141975 | 191054   | 35832  |
| 282.095 | 14.5 | [GL] 1-acyl-3-O-beta-D-galactosyl-sn-glycerol                             | 0.002 | 2.039   | 0.104 | 0.800    | 0.042 | 0.734   | 604167  | 44642  | 1231654  | 112799  | 984871   | 76169  | 903854   | 80816  |
| 283.114 | 18.2 | 2-Aminoadenosine                                                          | 0.003 | 13.934  | 0.005 | 0.169    | 0.004 | 0.150   | 6036    | 1203   | 84108    | 14703   | 14187    | 1642   | 12615    | 2706   |
| 283.190 | 15.9 | 12-trans-Hydroxy juvenile hormone III                                     | 0.015 | 0.577   | 0.130 | 1.697    | 0.306 | 4.466   | 28881   | 3414   | 16676    | 1948    | 28302    | 6324   | 74470    | 50669  |
| 283.190 | 29.1 | 12-trans-Hydroxy juvenile hormone III                                     | 0.039 | 0.634   | 0.425 | 1.233    | 0.377 | 1.220   | 27243   | 3513   | 17277    | 2016    | 21304    | 4307   | 21083    | 3535   |
| 284.098 | 12.7 | Guanosine                                                                 | 0.046 | 13.235  | 0.001 | 23.082   | 0.000 | 29.869  | 691     | 312    | 9141     | 3194    | 210981   | 31787  | 273025   | 31843  |
| 286.274 | 7.5  | [SP (17:0)] heptadecaspHING-4-enine                                       | 0.022 | 0.305   | 0.408 | 0.720    | 0.469 | 1.514   | 37901   | 8177   | 11566    | 3103    | 8323     | 2075   | 17515    | 7117   |
| 286.310 | 9.1  | [SP] 1-deoxy-sphinganine                                                  | 0.000 | 0.050   | 0.038 | 6.990    | 0.004 | 12.958  | 351267  | 33913  | 17697    | 3921    | 123710   | 38037  | 229319   | 43101  |
| 290.145 | 18.3 | Asp-Arg                                                                   | 0.001 | 9.928   | 0.046 | 0.612    | 0.475 | 0.867   | 11858   | 2093   | 117724   | 16947   | 72074    | 8896   | 102018   | 12534  |
| 291.129 | 16.8 | N-(L-Arginino)succinate                                                   | 0.002 | 24.687  | 0.002 | 3.091    | 0.001 | 5.223   | 1996    | 308    | 49283    | 8052    | 152315   | 19077  | 257384   | 32061  |
| 292.102 | 13.2 | 2,7-Anhydro-alpha-N-acetylneuraminic acid                                 | 0.011 | 2.197   | 0.002 | 0.192    | 0.002 | 0.279   | 223064  | 23733  | 490149   | 70312   | 93925    | 7804   | 136811   | 35036  |
| 292.102 | 17.5 | 2,7-Anhydro-alpha-N-acetylneuraminic acid                                 | 0.000 | 0.218   | 0.031 | 2.313    | 0.034 | 2.375   | 1442950 | 148203 | 314527   | 118731  | 727578   | 114139 | 746926   | 129380 |
| 292.113 | 15.8 | Ala-Asp-Ser                                                               | 0.018 | 26.499  | 0.012 | 2.608    | 0.001 | 4.340   | 305     | 305    | 8075     | 2258    | 21060    | 3405   | 35045    | 4789   |
| 296.065 | 14.6 | Aminoimidazole ribotide                                                   | 0.000 | 2.787   | 0.111 | 0.817    | 0.042 | 0.763   | 5580422 | 355619 | 15550577 | 1277033 | 12711386 | 984676 | 11858300 | 887359 |
| 296.116 | 15.5 | Triadimenol                                                               | 0.000 | 30.775  | 0.001 | 2.416    | 0.001 | 3.533   | 5575    | 1183   | 171573   | 18839   | 414566   | 38457  | 606136   | 62114  |
| 296.116 | 16.1 | Triadimenol                                                               | 0.028 | #DIV/0! | 0.033 | 3.601    | 0.004 | 6.598   | 0       | 0      | 15760    | 5154    | 56748    | 14111  | 103982   | 18044  |
| 296.258 | 3.9  | [SP (3:0)] sphinga-4E,8E,10E-trienine                                     | 0.033 | 0.174   | 0.018 | 10.425   | 0.001 | 5.368   | 25848   | 7337   | 4503     | 1618    | 46940    | 12381  | 24170    | 3513   |
| 298.096 | 7.6  | 5'-Methylthioadenosine                                                    | 0.012 | 2.125   | 0.004 | 1.713    | 0.000 | 2.085   | 1516901 | 251031 | 3223020  | 454861  | 5519649  | 408463 | 6720519  | 495846 |
| 298.096 | 16.5 | 5'-Methylthioadenosine                                                    | 0.001 | 16.085  | 0.002 | 2.271    | 0.001 | 3.484   | 32774   | 4772   | 527168   | 77023   | 1197229  | 129681 | 1836495  | 218724 |
| 299.221 | 4.1  | [FA (17:1/2:0)] 8E-Heptadecenedioic acid                                  | 0.003 | 0.402   | 0.359 | 9.691    | 0.576 | 1.195   | 80646   | 9623   | 32396    | 7619    | 313949   | 278891 | 38700    | 7803   |

|         |      |                                                                                |       |         |       |        |       |        |         |        |          |         |          |          |           |          |
|---------|------|--------------------------------------------------------------------------------|-------|---------|-------|--------|-------|--------|---------|--------|----------|---------|----------|----------|-----------|----------|
| 300.120 | 11.1 | [PC acety] 1-acetyl-sn-glycero-3-phosphocholine                                | 0.001 | #DIV/0! | 0.001 | 0.270  | 0.004 | 8.912  | 0       | 0      | 3698     | 474     | 998      | 317      | 32962     | 5845     |
| 300.289 | 7.5  | [SP] 3-dehydrosphinganine                                                      | 0.037 | 0.729   | 0.767 | 1.048  | 0.673 | 1.067  | 858867  | 73352  | 626294   | 62060   | 656069   | 75339    | 668119    | 73410    |
| 301.152 | 21.0 | Ala-Asn-Pro                                                                    | 0.042 | 3.245   | 0.122 | 0.509  | 0.179 | 0.573  | 13970   | 2614   | 45332    | 11634   | 23083    | 4705     | 25976     | 5852     |
| 308.064 | 15.3 | dCMP                                                                           | 0.000 | 23.917  | 0.000 | 0.091  | 0.000 | 0.076  | 3010    | 818    | 72000    | 7817    | 6558     | 1381     | 5446      | 651      |
| 308.090 | 14.2 | Glutathione                                                                    | 0.000 | 3.903   | 0.001 | 6.268  | 0.000 | 8.205  | 3975018 | 164749 | 15514619 | 1304003 | 97247820 | 11072519 | 127301628 | 14142938 |
| 309.242 | 4.0  | [FA methyl(18:2)] methyl 9,10-epoxy-12,15-octadecadienoate                     | 0.008 | 9.137   | 0.014 | 0.238  | 0.049 | 0.447  | 12957   | 1452   | 118387   | 24957   | 28146    | 6397     | 52893     | 11489    |
| 310.113 | 13.2 | N-Acetylneuraminate                                                            | 0.013 | 2.197   | 0.002 | 0.170  | 0.004 | 0.297  | 215484  | 22675  | 473444   | 70792   | 80249    | 7981     | 140781    | 30232    |
| 311.164 | 9.3  | [Fv] Dihydrocordoin                                                            | 0.053 | 0.614   | 0.474 | 1.187  | 0.351 | 6.241  | 83874   | 11934  | 51535    | 8171    | 61191    | 10050    | 321645    | 262844   |
| 311.164 | 19.3 | [Fv] Dihydrocordoin                                                            | 0.018 | 1.566   | 0.687 | 1.370  | 0.499 | 2.147  | 26106   | 4354   | 40886    | 1935    | 56004    | 35320    | 87786     | 64347    |
| 311.221 | 4.1  | [FA (18:3)] 13S-hydroperoxy-9Z,11E,14Z-octadecatrienoic acid                   | 0.049 | 0.468   | 0.000 | 86.842 | 0.000 | 98.895 | 36963   | 7564   | 17316    | 3182    | 1503790  | 92168    | 1712511   | 128110   |
| 311.221 | 26.3 | [FA (18:3)] 13S-hydroperoxy-9Z,11E,14Z-octadecatrienoic acid                   | 0.046 | 0.632   | 0.410 | 2.395  | 0.854 | 1.039  | 31620   | 4299   | 19987    | 2333    | 47869    | 30927    | 20765     | 3392     |
| 311.257 | 3.8  | Methoprene                                                                     | 0.000 | 4.448   | 0.000 | 0.497  | 0.000 | 0.276  | 304609  | 117640 | 1354855  | 66659   | 673074   | 100006   | 373371    | 95801    |
| 313.029 | 16.3 | gamma-Glutamyl-Se-methylselenocysteine                                         | 0.007 | #DIV/0! | 0.054 | 0.438  | 0.118 | 0.563  | 0       | 0      | 35338    | 7923    | 15479    | 2691     | 19898     | 3424     |
| 313.273 | 3.9  | [FA oxo(19:0)] 10-oxo-nonadecanoic acid                                        | 0.002 | 2.198   | 0.065 | 0.878  | 0.013 | 0.866  | 863529  | 197668 | 1898179  | 69728   | 1667167  | 85968    | 1642893   | 34672    |
| 313.273 | 18.2 | [FA oxo(19:0)] 10-oxo-nonadecanoic acid                                        | 0.045 | 1.713   | 0.543 | 1.850  | 0.012 | 0.605  | 15583   | 3880   | 26689    | 2768    | 49386    | 34700    | 16142     | 1931     |
| 315.079 | 18.0 | Valdecoxib                                                                     | 0.010 | 111.227 | 0.010 | 0.021  | 0.011 | 0.040  | 586     | 371    | 65233    | 15972   | 1368     | 458      | 2584      | 600      |
| 324.058 | 15.2 | CMP                                                                            | 0.003 | 2.389   | 0.791 | 1.041  | 0.072 | 1.341  | 138707  | 6508   | 331320   | 35659   | 345013   | 35358    | 444387    | 43110    |
| 324.059 | 16.3 | CMP                                                                            | 0.000 | 8.661   | 0.021 | 1.532  | 0.005 | 2.146  | 17974   | 2177   | 155686   | 17187   | 238479   | 24241    | 334145    | 39753    |
| 325.162 | 18.2 | Procollagen 5-(D-galactosyloxy)-L-lysine                                       | 0.005 | 10.943  | 0.010 | 0.254  | 0.006 | 0.122  | 4515    | 550    | 49409    | 9474    | 12528    | 2933     | 6030      | 637      |
| 325.200 | 14.6 | [FA oxo,hydroxy(18:3)] 12-oxo-14,18-dihydroxy-9Z,13E,15Z-octadecatrienoic acid | 0.013 | 0.437   | 0.970 | 1.006  | 0.434 | 1.185  | 49718   | 7725   | 21744    | 2796    | 21881    | 2165     | 25763     | 4023     |
| 325.273 | 3.8  | [FA hydroxy(20:2)] 11R-hydroxy-12E,14Z-eicosadienoic acid                      | 0.000 | 8.678   | 0.000 | 0.427  | 0.000 | 0.361  | 68941   | 15840  | 598243   | 39280   | 255516   | 50510    | 215713    | 22412    |
| 327.252 | 11.6 | [FA methoxy,hydroxy(18:2)] 8-methoxy-13-hydroxy-9,11-octadecadienoic acid      | 0.022 | 0.545   | 0.212 | 3.117  | 0.560 | 1.177  | 36766   | 5122   | 20046    | 2711    | 62483    | 29617    | 23597     | 5159     |
| 327.288 | 3.8  | 2-Oxophytanate                                                                 | 0.009 | 3.140   | 0.151 | 0.699  | 0.331 | 0.734  | 73242   | 23740  | 229948   | 39715   | 160798   | 14556    | 168742    | 44794    |
| 331.249 | 3.9  | [FA trihydroxy(18:0)] 9S,12S,13S-trihydroxy-10E-octadecenoic acid              | 0.024 | 9.046   | 0.015 | 2.152  | 0.022 | 2.523  | 5873    | 2326   | 53132    | 14907   | 114359   | 14501    | 134053    | 24477    |
| 332.146 | 14.3 | Thr-Asp-Pro                                                                    | 0.002 | 3.657   | 0.332 | 0.851  | 0.527 | 1.105  | 21168   | 1783   | 77411    | 9698    | 65905    | 5458     | 85568     | 7789     |
| 333.188 | 18.9 | Ala-Ser-Arg                                                                    | 0.042 | 2.033   | 0.152 | 0.669  | 0.208 | 0.673  | 28564   | 3227   | 58083    | 10905   | 38855    | 4820     | 39094     | 8870     |
| 335.073 | 16.0 | sn-glycero-3-Phospho-1-inositol                                                | 0.001 | 22.162  | 0.004 | 0.432  | 0.179 | 0.776  | 3624    | 804    | 80318    | 9725    | 34692    | 4759     | 62322     | 7719     |
| 335.257 | 3.8  | 5-alpha-THDOC                                                                  | 0.010 | 12.648  | 0.383 | 0.752  | 0.066 | 1.570  | 9781    | 1924   | 123715   | 28386   | 93072    | 17400    | 194212    | 17211    |
| 336.087 | 14.6 | S-Formylglutathione                                                            | 0.000 | 4.273   | 0.000 | 0.536  | 0.000 | 0.518  | 224215  | 9554   | 958163   | 43590   | 513111   | 36616    | 496044    | 41193    |
| 336.139 | 15.9 | N4-(Acetyl-beta-D-glucosaminyl)asparagine                                      | 0.006 | 3.659   | 0.002 | 0.031  | 0.002 | 0.105  | 9489    | 1329   | 34714    | 5635    | 1091     | 564      | 3630      | 1147     |
| 337.273 | 3.8  | 5beta-Pregnane-3alpha,17alpha,20alpha-triol                                    | 0.000 | 4.826   | 0.000 | 0.439  | 0.000 | 0.430  | 623067  | 30295  | 3007178  | 230207  | 1320415  | 95387    | 1291997   | 76098    |
| 337.273 | 20.1 | 5beta-Pregnane-3alpha,17alpha,20alpha-triol                                    | 0.021 | 0.600   | 0.202 | 3.211  | 0.001 | 1.561  | 20917   | 2563   | 12551    | 1182    | 40298    | 18860    | 19598     | 775      |



|         |      |                                                                                    |       |         |       |        |       |        |          |        |          |         |          |         |          |         |
|---------|------|------------------------------------------------------------------------------------|-------|---------|-------|--------|-------|--------|----------|--------|----------|---------|----------|---------|----------|---------|
| 338.076 | 15.9 | 5-Hydroxymethyldeoxycytidylate                                                     | 0.002 | 7.965   | 0.004 | 0.276  | 0.003 | 0.257  | 23791    | 4448   | 189488   | 28481   | 52245    | 8030    | 48781    | 9399    |
| 338.174 | 18.4 | Olopatadine                                                                        | 0.016 | 16.782  | 0.033 | 0.229  | 0.034 | 0.235  | 5147     | 1101   | 86373    | 22932   | 19788    | 5116    | 20308    | 3505    |
| 340.197 | 14.1 | Leu-Ala-His                                                                        | 0.000 | 0.171   | 0.081 | 0.539  | 0.026 | 0.372  | 40403    | 3931   | 6897     | 1405    | 3715     | 703     | 2568     | 520     |
| 341.304 | 3.8  | [FA oxo(21:0)] 2-oxo-heneicosanoic acid                                            | 0.000 | 3.496   | 0.000 | 0.540  | 0.000 | 0.412  | 627204   | 19145  | 2192753  | 118322  | 1184112  | 82770   | 904062   | 80419   |
| 341.304 | 7.5  | [FA oxo(21:0)] 2-oxo-heneicosanoic acid                                            | 0.001 | 2.202   | 0.018 | 0.704  | 0.837 | 0.948  | 43593    | 5274   | 95983    | 8159    | 67609    | 5316    | 91008    | 21704   |
| 344.279 | 4.9  | 1,2-dioctanoyl-1-amino-2,3-propanediol                                             | 0.000 | 4.596   | 0.001 | 2.197  | 0.001 | 2.255  | 28344    | 2356   | 130268   | 6714    | 286237   | 25776   | 293781   | 26458   |
| 347.167 | 23.5 | Asp-Gly-Arg                                                                        | 0.024 | 1.441   | 0.373 | 4.076  | 0.407 | 3.082  | 21289    | 2692   | 30675    | 2230    | 125045   | 96390   | 94541    | 70533   |
| 348.070 | 13.7 | AMP                                                                                | 0.007 | 3.809   | 0.008 | 1.801  | 0.003 | 1.945  | 242566   | 25077  | 923972   | 156164  | 1664380  | 158121  | 1797161  | 159602  |
| 348.070 | 16.6 | AMP                                                                                | 0.035 | 4.217   | 0.007 | 3.455  | 0.007 | 5.228  | 2332     | 272    | 9833     | 2623    | 33973    | 5787    | 51404    | 9719    |
| 349.117 | 12.9 | Camptothecin                                                                       | 0.001 | 2.661   | 0.000 | 9.794  | 0.000 | 13.505 | 1503306  | 41165  | 4000209  | 397792  | 39176354 | 3375732 | 54021306 | 5395945 |
| 350.120 | 12.9 | Thr-Asp-Asp                                                                        | 0.001 | 2.879   | 0.000 | 10.976 | 0.000 | 15.285 | 149506   | 5497   | 430502   | 41529   | 4725366  | 418718  | 6580409  | 657443  |
| 351.113 | 12.9 | Biapenem                                                                           | 0.000 | 4.167   | 0.000 | 11.420 | 0.000 | 16.182 | 31159    | 3719   | 129849   | 10280   | 1482900  | 133610  | 2101164  | 209509  |
| 352.116 | 12.9 | Met-Asp-Ser                                                                        | 0.000 | 8.396   | 0.000 | 66.740 | 0.000 | 91.330 | 299      | 298    | 2507     | 169     | 167295   | 16185   | 228933   | 23207   |
| 353.304 | 3.8  | auricolate                                                                         | 0.000 | 6.302   | 0.000 | 0.375  | 0.000 | 0.410  | 150549   | 20209  | 948792   | 54846   | 356156   | 32947   | 389118   | 14861   |
| 354.336 | 4.2  | [FA (20:0)] N-(11Z-eicosenoyl)-ethanolamine                                        | 0.045 | 0.133   | 0.085 | 3.038  | 0.322 | 3.159  | 1225632  | 400600 | 163343   | 90053   | 496170   | 144560  | 516073   | 312862  |
| 357.249 | 21.9 | Leu-Lys-Pro                                                                        | 0.021 | 2.480   | 0.402 | 1.210  | 0.621 | 1.161  | 24380    | 5088   | 60469    | 11120   | 73169    | 9291    | 70227    | 15451   |
| 361.273 | 3.8  | [ST (3:0)] (5Z,7E)-(1S,3R)-24-nor-9,10-seco-5,7,10(19)-cholatriene-1,3,23-triol    | 0.000 | 0.301   | 0.000 | 0.398  | 0.001 | 0.439  | 9610259  | 478892 | 2891784  | 249356  | 1149724  | 105305  | 1270854  | 83361   |
| 363.288 | 3.7  | [ST (3:0)] 24-Nor-5beta-chol-22-ene-3alpha,7alpha,12alpha-triol                    | 0.001 | 2.697   | 0.000 | 0.309  | 0.000 | 0.352  | 1501676  | 59505  | 4050195  | 342796  | 1252031  | 108677  | 1425781  | 98733   |
| 363.325 | 4.0  | [ST (2:0)] 5beta-Cholane-3alpha,24-diol                                            | 0.048 | 0.526   | 0.405 | 1.309  | 0.656 | 1.195  | 9046     | 1137   | 4755     | 1499    | 6226     | 721     | 5680     | 1342    |
| 365.304 | 3.7  | [GL (8:0)] 2-(8-[3]-ladderane-octanyl)-sn-glycerol                                 | 0.000 | 4.956   | 0.000 | 0.260  | 0.000 | 0.267  | 681098   | 21299  | 3375280  | 260737  | 878046   | 75691   | 899932   | 56081   |
| 365.340 | 4.0  | [FA (24:2)] 5,9-tetracosadienoic acid                                              | 0.020 | 0.225   | 0.002 | 12.382 | 0.003 | 6.876  | 6643     | 1044   | 1497     | 1496    | 18533    | 3354    | 10292    | 1695    |
| 367.209 | 18.2 | 6alpha,9-Difluoro-11beta-hydroxypregn-4-ene-3,20-dione                             | 0.028 | 6.348   | 0.039 | 0.237  | 0.029 | 0.167  | 6249     | 1364   | 39672    | 10949   | 9404     | 2348    | 6616     | 975     |
| 369.335 | 3.9  | [FA oxo(23:0)] 2-oxo-tricosanoic acid                                              | 0.003 | 5.404   | 0.032 | 0.526  | 0.008 | 0.363  | 11339    | 2628   | 61278    | 9781    | 32232    | 5295    | 22261    | 4209    |
| 377.304 | 3.8  | 3alpha-Hydroxy-5beta-cholanate                                                     | 0.000 | 2.654   | 0.000 | 0.196  | 0.000 | 0.222  | 363066   | 13494  | 963511   | 76879   | 189066   | 18157   | 214231   | 9992    |
| 379.320 | 3.8  | [ST (3:0/3:0)] (7E)-(1R,3R)-9,11,21-trinor-9,10-seco-5,7-cholestadien-1,3,25-triol | 0.000 | 5.875   | 0.000 | 0.142  | 0.000 | 0.192  | 53384    | 15127  | 313638   | 19361   | 44434    | 10828   | 60357    | 15430   |
| 380.111 | 12.1 | (R)-S-Lactoylglutathione                                                           | 0.001 | #DIV/0! | 0.000 | 7.408  | 0.000 | 10.455 | 0        | 0      | 14631    | 2203    | 108382   | 7974    | 152968   | 12671   |
| 381.224 | 7.5  | 4,4-Difluoro-17beta-hydroxyandrost-5-en-3-one propionate                           | 0.014 | 0.591   | 0.518 | 1.227  | 0.766 | 0.880  | 31014    | 3021   | 18323    | 3016    | 22484    | 5362    | 16126    | 6427    |
| 384.114 | 14.4 | Succinyladenosine                                                                  | 0.050 | #DIV/0! | 0.006 | 3.782  | 0.006 | 2.794  | 0        | 0      | 12408    | 4814    | 46931    | 8046    | 34669    | 4234    |
| 385.128 | 13.7 | 4'-Demethyldeoxypodophyllotoxin                                                    | 0.015 | 2.026   | 0.000 | 3.021  | 0.000 | 3.160  | 22747    | 3570   | 46082    | 6596    | 139230   | 10116   | 145611   | 9448    |
| 385.219 | 13.1 | Lys-Thr-His                                                                        | 0.009 | 12.948  | 0.011 | 2.345  | 0.003 | 2.999  | 2147     | 347    | 27794    | 6264    | 65186    | 9674    | 83346    | 11276   |
| 386.289 | 4.9  | 3-Hydroxy-cis-5-tetradecenoylcarnitine                                             | 0.002 | 9.282   | 0.107 | 1.459  | 0.000 | 6.815  | 3070     | 800    | 28494    | 4529    | 41569    | 5769    | 194180   | 20226   |
| 387.288 | 3.8  | Testosterone isocaproate                                                           | 0.004 | 1.806   | 0.000 | 0.134  | 0.000 | 0.163  | 10422315 | 501428 | 18821217 | 1710605 | 2525513  | 215597  | 3060405  | 207952  |
| 388.292 | 3.8  | Leu-Lys-Lys                                                                        | 0.004 | 1.811   | 0.000 | 0.128  | 0.000 | 0.159  | 2741102  | 125702 | 4963339  | 462288  | 637065   | 61565   | 786939   | 48649   |

|         |      |                                                                                                             |       |         |       |        |       |        |         |        |         |        |          |        |         |         |
|---------|------|-------------------------------------------------------------------------------------------------------------|-------|---------|-------|--------|-------|--------|---------|--------|---------|--------|----------|--------|---------|---------|
| 389.177 | 14.5 | Asn-Gln-Gln                                                                                                 | 0.009 | 21.868  | 0.299 | 0.711  | 0.541 | 0.823  | 4402    | 487    | 96268   | 21970  | 68490    | 11732  | 79220   | 15394   |
| 389.304 | 3.8  | [PR (2:0)] (+)-24,25-epoxy-16-scalaren-12alpha,25alpha-diol                                                 | 0.000 | 4.022   | 0.000 | 0.199  | 0.000 | 0.231  | 830741  | 68662  | 3341319 | 289466 | 666368   | 62098  | 772931  | 49533   |
| 391.320 | 3.8  | [ST (3:0/3:0)] (5Z,7E)-A-dinor-(1,2)-(9,10)-diseco-5,7,10(19)-cholestatriene-1,2,25-triol                   | 0.000 | 8.051   | 0.000 | 0.190  | 0.000 | 0.160  | 61423   | 6330   | 494507  | 33485  | 93841    | 13803  | 79354   | 20059   |
| 395.160 | 15.0 | Ala-Met-Ser-Ser                                                                                             | 0.043 | #DIV/0! | 0.005 | 24.910 | 0.005 | 15.895 | 0       | 0      | 3361    | 1247   | 83732    | 16740  | 53430   | 10637   |
| 396.018 | 14.2 | Molybdopterin                                                                                               | 0.000 | 2.819   | 0.041 | 1.399  | 0.118 | 1.316  | 103183  | 5189   | 290831  | 11181  | 406809   | 42743  | 382817  | 48495   |
| 399.144 | 16.5 | Deoxypodophyllotoxin                                                                                        | 0.001 | 12.274  | 0.002 | 2.272  | 0.001 | 3.429  | 236785  | 14354  | 2906365 | 422510 | 6604120  | 719397 | 9967214 | 1194973 |
| 400.147 | 16.6 | Glu-Asp-His                                                                                                 | 0.002 | 25.843  | 0.003 | 2.298  | 0.001 | 3.502  | 16218   | 4560   | 419119  | 65210  | 963253   | 108646 | 1467753 | 178492  |
| 400.341 | 4.7  | [FA] O-Palmitoyl-R-carnitine                                                                                | 0.000 | 3.586   | 0.005 | 1.653  | 0.783 | 0.965  | 1712161 | 87193  | 6139616 | 562898 | 10148843 | 885056 | 5926741 | 499288  |
| 400.342 | 7.5  | [FA] O-Palmitoyl-R-carnitine                                                                                | 0.001 | 3.596   | 0.005 | 1.758  | 0.619 | 0.929  | 183702  | 9915   | 660542  | 71635  | 1161363  | 112308 | 613720  | 56352   |
| 401.140 | 16.5 | [Fv methoxy, methox] (S)-2,3-Dihydro-7-methoxy-2-[2-(4-methoxyphenyl)-5-benzofuranyl]-4H-1-benzopyran-4-one | 0.003 | 121.893 | 0.002 | 2.657  | 0.002 | 4.021  | 799     | 362    | 97430   | 18215  | 258825   | 30394  | 391809  | 53346   |
| 402.143 | 16.6 | Met-Asp-His                                                                                                 | 0.006 | #DIV/0! | 0.027 | 5.245  | 0.011 | 9.886  | 0       | 0      | 3307    | 721    | 17345    | 4564   | 32696   | 7551    |
| 402.144 | 12.5 | Met-Asp-His                                                                                                 | 0.002 | 10.007  | 0.000 | 9.927  | 0.000 | 11.976 | 1049    | 337    | 10501   | 1653   | 104241   | 8169   | 125762  | 9594    |
| 405.009 | 18.9 | UDP                                                                                                         | 0.049 | 1.786   | 0.504 | 1.192  | 0.028 | 1.832  | 9383    | 1636   | 16758   | 2740   | 19979    | 3731   | 30693   | 4457    |
| 405.208 | 14.8 | Asn-Lys-Gly-Ser                                                                                             | 0.001 | 0.158   | 0.002 | 9.879  | 0.006 | 11.343 | 47575   | 6081   | 7518    | 2160   | 74270    | 11134  | 85278   | 17247   |
| 407.135 | 14.1 | Astringin                                                                                                   | 0.001 | 65.156  | 0.518 | 0.833  | 0.392 | 1.243  | 481     | 305    | 31372   | 4163   | 26135    | 6544   | 39006   | 7329    |
| 409.366 | 3.9  | [FA oxo(26:0)] 17-oxo-20Z-hexacosenoic acid                                                                 | 0.042 | 0.581   | 0.240 | 1.278  | 0.327 | 1.367  | 20168   | 3111   | 11716   | 1218   | 14977    | 2254   | 16020   | 3849    |
| 411.346 | 7.4  | MG(0:0/22:2(13Z,16Z)/0:0)                                                                                   | 0.054 | 0.236   | 0.730 | 1.366  | 0.970 | 1.037  | 944024  | 284081 | 222987  | 127590 | 304640   | 190041 | 231235  | 167945  |
| 413.362 | 3.9  | MG(0:0/22:1(13Z)/0:0)                                                                                       | 0.034 | 0.342   | 0.681 | 1.252  | 0.531 | 1.429  | 80285   | 18394  | 27464   | 7679   | 34382    | 14256  | 39235   | 16140   |
| 414.320 | 4.9  | 3-Hydroxy-9-hexadecenoylcarnitine                                                                           | 0.002 | 29.177  | 0.014 | 2.715  | 0.000 | 4.851  | 1707    | 782    | 49818   | 8638   | 135242   | 23695  | 241672  | 22735   |
| 414.357 | 4.6  | Heptadecanoylcarnitine                                                                                      | 0.000 | 5.873   | 0.000 | 2.262  | 0.132 | 1.294  | 57517   | 9759   | 337774  | 34993  | 764109   | 60847  | 437192  | 48796   |
| 424.341 | 4.6  | Linoelaidylcarnitine                                                                                        | 0.000 | 3.512   | 0.107 | 1.701  | 0.169 | 0.796  | 23441   | 3670   | 82335   | 7426   | 140015   | 29197  | 65532   | 8523    |
| 425.043 | 14.9 | Thiamin diphosphate                                                                                         | 0.019 | 2.807   | 0.861 | 1.059  | 0.010 | 1.861  | 38319   | 5412   | 107578  | 20539  | 113921   | 28514  | 200255  | 21115   |
| 426.357 | 4.6  | Elaidiccarnitine                                                                                            | 0.000 | 5.244   | 0.009 | 1.587  | 0.978 | 1.003  | 528837  | 26253  | 2773251 | 250965 | 4402310  | 412106 | 2782716 | 216033  |
| 428.036 | 14.2 | ADP                                                                                                         | 0.002 | 2.272   | 0.128 | 1.246  | 0.024 | 1.425  | 195741  | 9463   | 444776  | 41888  | 553991   | 50487  | 633670  | 56047   |
| 428.036 | 15.2 | ADP                                                                                                         | 0.001 | 3.914   | 0.433 | 1.119  | 0.055 | 1.326  | 187555  | 16200  | 734028  | 82191  | 821350   | 68021  | 973369  | 73468   |
| 428.036 | 16.6 | ADP                                                                                                         | 0.002 | 3.752   | 0.004 | 3.800  | 0.003 | 4.440  | 2568    | 431    | 9637    | 1265   | 36615    | 5543   | 42783   | 6206    |
| 428.373 | 4.6  | Stearoylcarnitine                                                                                           | 0.005 | 1.898   | 0.001 | 2.351  | 0.003 | 1.699  | 600357  | 27947  | 1139440 | 116577 | 2678949  | 264670 | 1935857 | 161004  |
| 429.088 | 4.0  | Diethylstilbestrol diphosphate                                                                              | 0.042 | 0.284   | 0.545 | 1.384  | 0.318 | 16.093 | 33127   | 8788   | 9419    | 2995   | 13031    | 4875   | 151571  | 128133  |
| 429.239 | 16.8 | Aspidoalbine                                                                                                | 0.043 | 3.784   | 0.064 | 0.351  | 0.031 | 0.186  | 642831  | 157442 | 2432774 | 665700 | 854830   | 158342 | 452913  | 83270   |
| 430.243 | 17.7 | Lys-Trp-Pro                                                                                                 | 0.003 | 6.351   | 0.005 | 0.184  | 0.003 | 0.111  | 118987  | 38869  | 755667  | 129762 | 138761   | 26406  | 84241   | 11939   |
| 431.237 | 18.4 | Gln-Gln-Arg                                                                                                 | 0.018 | 0.610   | 0.014 | 1.607  | 0.339 | 1.303  | 26094   | 2658   | 15930   | 2400   | 25592    | 2160   | 20761   | 4099    |
| 433.330 | 9.3  | [ST (2:0)] (7E)-(1S,3R,6R)-6,19-epidioxo-9,10-seco-5(10),7-cholestadiene-1,3-diol                           | 0.011 | 2.245   | 0.298 | 0.721  | 0.120 | 0.705  | 21246   | 2314   | 47706   | 6919   | 34387    | 9881   | 33620   | 4260    |

|         |      |                                                                                                            |       |         |       |        |       |        |          |         |          |        |          |         |          |         |
|---------|------|------------------------------------------------------------------------------------------------------------|-------|---------|-------|--------|-------|--------|----------|---------|----------|--------|----------|---------|----------|---------|
| 438.297 | 4.7  | [PE (16:1)] 1-(1Z-hexadecenyl)-sn-glycero-3-phosphoethanolamine                                            | 0.001 | 2.876   | 0.048 | 0.756  | 0.524 | 0.928  | 500958   | 16723   | 1440707  | 133247 | 1088567  | 64701   | 1336956  | 81029   |
| 438.297 | 7.6  | [PE (16:1)] 1-(1Z-hexadecenyl)-sn-glycero-3-phosphoethanolamine                                            | 0.001 | 3.098   | 0.036 | 0.716  | 0.121 | 0.803  | 86121    | 4557    | 266793   | 25831  | 191049   | 15863   | 214128   | 16276   |
| 441.297 | 13.5 | [ST (2:0/2:0/2:0)] (5Z,7E)-(3S)-26,26,26-trifluoro-27-nor-9,10-seco-5,7,10(19)-cholestatriene-3,25-diol    | 0.000 | 2.046   | 0.418 | 1.189  | 0.220 | 1.201  | 11852028 | 1427059 | 24251208 | 393787 | 28839186 | 5190261 | 29134598 | 3474263 |
| 441.297 | 14.4 | [ST (2:0/2:0/2:0)] (5Z,7E)-(3S)-26,26,26-trifluoro-27-nor-9,10-seco-5,7,10(19)-cholestatriene-3,25-diol    | 0.000 | 0.090   | 0.134 | 4.069  | 0.442 | 1.193  | 45897171 | 612440  | 4141756  | 736907 | 16852024 | 7097592 | 4940125  | 670798  |
| 441.393 | 3.9  | MG(0:0/24:1(15Z)/0:0)                                                                                      | 0.024 | 0.276   | 0.368 | 1.619  | 0.928 | 1.034  | 102418   | 23677   | 28281    | 8637   | 45790    | 16130   | 29248    | 5666    |
| 442.352 | 7.6  | 3-Hydroxy-11Z-octadecenoylcarnitine                                                                        | 0.001 | #DIV/0! | 0.000 | 13.029 | 0.000 | 11.175 | 0        | 0       | 17797    | 2668   | 231870   | 23267   | 198872   | 21113   |
| 444.031 | 18.1 | GDP                                                                                                        | 0.008 | 13.538  | 0.733 | 0.896  | 0.489 | 1.200  | 3981     | 945     | 53892    | 11925  | 48287    | 10635   | 64661    | 8979    |
| 444.031 | 17.5 | GDP                                                                                                        | 0.000 | 11.759  | 0.002 | 2.320  | 0.012 | 1.579  | 4602     | 609     | 54110    | 4717   | 125559   | 13066   | 85423    | 8438    |
| 447.067 | 16.3 | CDP-ethanolamine                                                                                           | 0.000 | 27.687  | 0.064 | 1.373  | 0.004 | 1.915  | 1601     | 504     | 44339    | 4155   | 60887    | 6546    | 84894    | 8865    |
| 448.149 | 15.7 | Asn-Asp-Cys-Pro                                                                                            | 0.000 | #DIV/0! | 0.000 | 0.000  | 0.000 | 0.042  | 0        | 0       | 74319    | 8740   | 0        | 0       | 3103     | 976     |
| 452.312 | 4.7  | [PC (14:1)] 1-(1E-tetradecenyl)-sn-glycero-3-phosphocholine                                                | 0.004 | 3.832   | 0.012 | 0.429  | 0.058 | 0.594  | 51626    | 9802    | 197844   | 30602  | 84814    | 14535   | 117549   | 20236   |
| 454.292 | 14.5 | [PE (16:0)] 1-hexadecanoyl-sn-glycero-3-phosphoethanolamine                                                | 0.000 | 0.163   | 0.081 | 3.601  | 0.846 | 0.947  | 730525   | 31725   | 119222   | 21284  | 429298   | 142273  | 112872   | 23683   |
| 460.193 | 14.2 | 5-Methyltetrahydrofolate                                                                                   | 0.050 | #DIV/0! | 0.013 | 3.039  | 0.004 | 4.201  | 0        | 0       | 4073     | 1579   | 12379    | 2205    | 17110    | 2891    |
| 465.176 | 18.8 | Enhydrin                                                                                                   | 0.000 | #DIV/0! | 0.000 | 0.000  | 0.000 | 0.000  | 0        | 0       | 115644   | 9504   | 0        | 0       | 0        | 0       |
| 466.328 | 4.6  | [PC (15:1)] 1-(1Z-pentadecenyl)-sn-glycero-3-phosphocholine                                                | 0.001 | 2.346   | 0.004 | 0.627  | 0.023 | 0.742  | 623617   | 24153   | 1462770  | 116877 | 916800   | 63406   | 1085071  | 63010   |
| 466.328 | 7.5  | [PC (15:1)] 1-(1Z-pentadecenyl)-sn-glycero-3-phosphocholine                                                | 0.005 | 2.601   | 0.028 | 0.599  | 0.072 | 0.693  | 82432    | 1661    | 214412   | 28094  | 128456   | 14509   | 148635   | 13604   |
| 467.332 | 4.6  | [ST (3:0/3:0/3:0)] (5Z,7E)-(1S,3R)-24,24-difluoro-24a-homo-9,10-seco-5,7,10(19)-cholestatrien-1,3,25-triol | 0.006 | 2.677   | 0.034 | 0.558  | 0.051 | 0.613  | 113667   | 17714   | 304334   | 44232  | 169721   | 30257   | 186511   | 26573   |
| 473.119 | 14.4 | [FA methyl,oxo,hydroxy(4:0)] methyl 9-oxo-10-iodo-12R-hydroxy-5Z,7E,10Z,13Z-prostatetraenoate-cyclo[8,12]  | 0.001 | 14.970  | 0.001 | 0.173  | 0.001 | 0.147  | 15241    | 2063    | 228169   | 27273  | 39585    | 7335    | 33437    | 5391    |
| 473.319 | 15.9 | Ala-Lys-Val-Arg                                                                                            | 0.030 | 0.045   | 0.000 | 25.047 | 0.001 | 23.576 | 443487   | 140774  | 19867    | 4126   | 497615   | 37505   | 468390   | 69929   |
| 478.328 | 4.7  | [PC (16:2)] 1-(9E,10E-hexadecadienyl)-sn-glycero-3-phosphocholine                                          | 0.015 | 2.649   | 0.067 | 2.657  | 0.003 | 4.121  | 9712     | 1526    | 25732    | 4533   | 68362    | 18296   | 106056   | 15623   |
| 480.308 | 4.7  | [PE (18:0)] 1-(9Z-octadecenoyl)-sn-glycero-3-phosphoethanolamine                                           | 0.000 | 5.449   | 0.181 | 1.167  | 0.029 | 1.298  | 105689   | 6215    | 575860   | 50872  | 672011   | 43240   | 747576   | 44065   |
| 480.344 | 4.7  | [PC (16:1)] 1-(1Z-hexadecenyl)-sn-glycero-3-phosphocholine                                                 | 0.006 | 1.894   | 0.013 | 1.510  | 0.006 | 1.552  | 382646   | 20452   | 724573   | 77458  | 1093920  | 94143   | 1124878  | 82957   |
| 481.313 | 3.9  | His-Leu-Leu-Val                                                                                            | 0.043 | 0.105   | 0.252 | 1.540  | 0.090 | 1.745  | 66309    | 21962   | 6978     | 1345   | 10746    | 2716    | 12175    | 2333    |
| 482.323 | 4.7  | [PC (15:0)] 1-pentadecanoyl-sn-glycero-3-phosphocholine                                                    | 0.002 | 1.734   | 0.746 | 0.951  | 0.637 | 0.932  | 2496900  | 263931  | 4330205  | 357993 | 4116063  | 530253  | 4036747  | 482354  |
| 482.323 | 14.5 | [PC (15:0)] 1-pentadecanoyl-sn-glycero-3-phosphocholine                                                    | 0.000 | 0.217   | 0.000 | 5.554  | 0.118 | 2.908  | 861053   | 60878   | 187130   | 20567  | 1039228  | 25880   | 544197   | 188804  |
| 482.323 | 8.2  | [PC (15:0)] 1-pentadecanoyl-sn-glycero-3-phosphocholine                                                    | 0.027 | 1.984   | 0.314 | 0.788  | 0.630 | 0.871  | 36621    | 7708    | 72674    | 11283  | 57255    | 9106    | 63327    | 14967   |
| 482.323 | 7.5  | [PC (15:0)] 1-pentadecanoyl-sn-glycero-3-phosphocholine                                                    | 0.019 | 2.036   | 0.033 | 0.632  | 0.197 | 0.723  | 924676   | 288614  | 1882385  | 133127 | 1189677  | 232689  | 1360405  | 338288  |
| 482.360 | 4.8  | [PC (16:2)] 1-hexadecyl-sn-glycero-3-phosphocholine                                                        | 0.005 | 0.637   | 0.000 | 3.288  | 0.000 | 3.613  | 1184766  | 67179   | 754294   | 94292  | 2480094  | 222446  | 2725040  | 245983  |
| 483.991 | 18.4 | CTP                                                                                                        | 0.009 | 12.294  | 0.753 | 1.090  | 0.064 | 1.639  | 8171     | 1900    | 100455   | 22160  | 109475   | 16854   | 164607   | 21489   |

|         |      |                                                                          |       |         |       |        |       |        |         |        |         |        |          |         |          |         |
|---------|------|--------------------------------------------------------------------------|-------|---------|-------|--------|-------|--------|---------|--------|---------|--------|----------|---------|----------|---------|
| 484.975 | 17.9 | UTP                                                                      | 0.001 | 0.534   | 0.000 | 7.534  | 0.000 | 11.550 | 93098   | 4825   | 49715   | 7288   | 374553   | 38565   | 574215   | 54969   |
| 487.310 | 7.5  | Arg-Val-Gly-Arg                                                          | 0.046 | 0.258   | 0.910 | 0.972  | 0.079 | 5.754  | 986016  | 277424 | 254076  | 24970  | 246948   | 55087   | 1461842  | 549285  |
| 489.114 | 15.3 | CDP-choline                                                              | 0.001 | 22.575  | 0.001 | 0.142  | 0.001 | 0.191  | 34937   | 4543   | 788678  | 97743  | 111835   | 16102   | 150416   | 18829   |
| 494.323 | 7.6  | [PC (16:0)] 1-(9Z-hexadecenoyl)-sn-glycero-3-phosphocholine              | 0.001 | 9.538   | 0.001 | 5.373  | 0.000 | 5.249  | 5320    | 1894   | 50737   | 6470   | 272614   | 31964   | 266323   | 26607   |
| 498.219 | 15.6 | Validamycin A                                                            | 0.012 | 6.196   | 0.008 | 0.066  | 0.015 | 0.224  | 5532    | 1282   | 34278   | 7555   | 2252     | 903     | 7685     | 2303    |
| 504.306 | 4.6  | LysoPE(0:0/20:3(11Z,14Z,17Z))                                            | 0.000 | 7.169   | 0.298 | 1.099  | 0.780 | 1.039  | 46609   | 6898   | 334141  | 22230  | 367386   | 20583   | 347271   | 39519   |
| 506.360 | 4.7  | [PC (18:2)] 1-(1Z,9Z-octadecadienyl)-sn-glycero-3-phosphocholine         | 0.006 | 4.027   | 0.766 | 0.932  | 0.808 | 1.055  | 36910   | 5169   | 148624  | 24999  | 138461   | 21896   | 156839   | 21340   |
| 507.201 | 8.1  | Piperaduncin B                                                           | 0.049 | #DIV/0! | 0.051 | 0.015  | 0.055 | 0.042  | 0       | 0      | 43259   | 16672  | 630      | 400     | 1799     | 447     |
| 507.201 | 4.9  | Piperaduncin B                                                           | 0.028 | #DIV/0! | 0.032 | 0.036  | 0.057 | 0.196  | 0       | 0      | 79675   | 26031  | 2830     | 1319    | 15606    | 3966    |
| 508.002 | 16.6 | ATP                                                                      | 0.002 | 1.987   | 0.001 | 2.006  | 0.001 | 2.416  | 1689875 | 77228  | 3357241 | 295662 | 6734471  | 590667  | 8111765  | 717997  |
| 508.338 | 4.7  | [PC (17:0)] 1-(10Z-heptadecenoyl)-sn-glycero-3-phosphocholine            | 0.013 | 8.581   | 0.000 | 5.318  | 0.000 | 6.127  | 14419   | 4972   | 123735  | 29509  | 658053   | 56566   | 758087   | 59018   |
| 508.375 | 4.7  | [PC (18:1)] 1-(11Z-octadecenyl)-sn-glycero-3-phosphocholine              | 0.037 | 1.540   | 0.013 | 1.558  | 0.006 | 1.622  | 719819  | 31856  | 1108816 | 138592 | 1727458  | 149434  | 1798251  | 145714  |
| 510.305 | 27.3 | Gln-Leu-Leu-His                                                          | 0.052 | 0.610   | 0.347 | 1.229  | 0.025 | 1.449  | 66533   | 9885   | 40590   | 5476   | 49871    | 7583    | 58797    | 4066    |
| 510.355 | 7.6  | LysoPC(17:0)                                                             | 0.041 | 1.479   | 0.001 | 4.908  | 0.001 | 5.607  | 30581   | 2257   | 45240   | 5348   | 222056   | 25263   | 253654   | 30015   |
| 516.300 | 7.5  | Taurocholate                                                             | 0.026 | 0.428   | 0.236 | 1.754  | 0.254 | 1.738  | 1746590 | 297148 | 747904  | 235511 | 1312043  | 374347  | 1299547  | 383938  |
| 519.324 | 4.8  | Hodgkinsine                                                              | 0.028 | 1.557   | 0.000 | 4.214  | 0.000 | 5.182  | 179177  | 12406  | 278983  | 33025  | 1175670  | 75465   | 1445672  | 89269   |
| 520.340 | 4.7  | [PC (18:2)] 1-(9Z,12Z-octadecadienyl)-sn-glycero-3-phosphocholine        | 0.005 | 52.061  | 0.000 | 4.666  | 0.000 | 5.703  | 3723    | 2548   | 193819  | 39395  | 904396   | 93779   | 1105255  | 112814  |
| 521.343 | 4.7  | Lys-Lys-Phe-Val                                                          | 0.005 | 57.756  | 0.001 | 4.975  | 0.002 | 7.021  | 782     | 782    | 45173   | 9512   | 224736   | 27608   | 317142   | 46948   |
| 522.354 | 4.7  | 1-Oleoilylglycerophosphocholine                                          | 0.003 | 4.140   | 0.000 | 4.038  | 0.000 | 4.998  | 1050702 | 64333  | 4349473 | 604148 | 17562470 | 1456642 | 21738895 | 1803978 |
| 522.355 | 7.5  | 1-Oleoilylglycerophosphocholine                                          | 0.002 | 3.996   | 0.000 | 4.799  | 0.000 | 5.347  | 70931   | 4446   | 283429  | 35197  | 1360049  | 125318  | 1515550  | 158314  |
| 523.997 | 19.3 | GTP                                                                      | 0.000 | 7.584   | 0.060 | 1.485  | 0.002 | 2.214  | 23676   | 6051   | 179560  | 13191  | 266656   | 35662   | 397535   | 40427   |
| 526.292 | 4.6  | LysoPE(0:0/22:6(4Z,7Z,10Z,13Z,16Z,19Z))                                  | 0.001 | 2.359   | 0.214 | 0.853  | 0.136 | 0.813  | 201254  | 14089  | 474664  | 42078  | 405074   | 30659   | 385937   | 34693   |
| 528.308 | 4.6  | LysoPE(0:0/22:5(4Z,7Z,10Z,13Z,16Z))                                      | 0.000 | 3.192   | 0.190 | 0.877  | 0.032 | 0.728  | 129104  | 16146  | 412101  | 26969  | 361325   | 23894   | 300211   | 35297   |
| 529.311 | 4.6  | Glu-Lys-Pro-Arg                                                          | 0.015 | 2.814   | 0.825 | 1.067  | 0.317 | 0.725  | 26891   | 4499   | 75675   | 13898  | 80743    | 17352   | 54864    | 14047   |
| 536.370 | 4.7  | [PC (16:2/3:0)] 1-hexadecyl-2-(2E-propionyl)-sn-glycero-3-phosphocholine | 0.006 | 5.406   | 0.000 | 4.113  | 0.000 | 5.540  | 16248   | 3175   | 87835   | 16147  | 361274   | 31621   | 486638   | 38912   |
| 538.386 | 4.6  | [PC acetyl(17:2)] 1-heptadecyl-2-acetyl-sn-glycero-3-phosphocholine      | 0.002 | 0.383   | 0.000 | 11.862 | 0.000 | 12.722 | 139172  | 15723  | 53328   | 8042   | 632577   | 51818   | 678458   | 55359   |
| 542.067 | 14.2 | Cyclic ADP-ribose                                                        | 0.004 | 2.225   | 0.136 | 1.278  | 0.028 | 1.475  | 142675  | 6598   | 317407  | 34809  | 405544   | 41527   | 468155   | 46433   |
| 543.300 | 14.9 | Arg-Asp-Pro-Arg                                                          | 0.019 | 0.481   | 0.168 | 1.750  | 0.274 | 6.172  | 62416   | 7052   | 30031   | 8997   | 52557    | 12065   | 185337   | 126178  |
| 545.341 | 4.7  | Glu-Leu-Lys-Arg                                                          | 0.021 | 1.668   | 0.000 | 2.782  | 0.000 | 3.283  | 194299  | 9606   | 324055  | 39681  | 901482   | 67857   | 1063936  | 70643   |
| 548.373 | 4.6  | LysoPC(20:2(11Z,14Z))                                                    | 0.000 | #DIV/0! | 0.000 | 12.825 | 0.001 | 19.504 | 0       | 0      | 14487   | 1271   | 185785   | 18099   | 282549   | 33704   |
| 550.386 | 4.6  | LysoPC(20:1(11Z))                                                        | 0.001 | 3.159   | 0.000 | 4.528  | 0.000 | 6.146  | 68282   | 8304   | 215702  | 22813  | 976611   | 77461   | 1325598  | 109050  |
| 552.402 | 4.6  | [PC (20:0)] 1-eicosanoyl-sn-glycero-3-phosphocholine                     | 0.004 | 0.498   | 0.000 | 8.458  | 0.000 | 10.813 | 135444  | 6410   | 67426   | 14580  | 570294   | 44001   | 729094   | 50835   |

|         |      |                                                                                           |       |         |       |         |       |        |         |        |         |        |         |        |         |        |
|---------|------|-------------------------------------------------------------------------------------------|-------|---------|-------|---------|-------|--------|---------|--------|---------|--------|---------|--------|---------|--------|
| 568.339 | 4.6  | [PC (22:6)] 1-(4Z,7Z,10Z,13Z,16Z,19Z-docosahexaenoyl)-sn-glycero-3-phosphocholine         | 0.009 | 2.501   | 0.000 | 3.014   | 0.000 | 2.920  | 177353  | 15799  | 443606  | 66533  | 1336821 | 113711 | 1295128 | 112524 |
| 570.354 | 4.6  | LysoPC(22:5(4Z,7Z,10Z,13Z,16Z))                                                           | 0.018 | 2.029   | 0.000 | 3.403   | 0.000 | 3.515  | 146497  | 15303  | 297302  | 44321  | 1011806 | 90392  | 1044876 | 99060  |
| 574.093 | 12.6 | GDP-3,6-dideoxy-D-galactose                                                               | 0.001 | #DIV/0! | 0.001 | 0.046   | 0.007 | 0.346  | 0       | 0      | 24071   | 3708   | 1114    | 501    | 8329    | 2517   |
| 594.184 | 17.5 | [Fv] Tinctormine                                                                          | 0.026 | 2.428   | 0.038 | 0.470   | 0.935 | 0.976  | 6307    | 995    | 15311   | 2920   | 7194    | 1043   | 14941   | 3326   |
| 594.310 | 17.5 | Integerrine                                                                               | 0.015 | 2.058   | 0.024 | 0.544   | 0.411 | 0.826  | 9913    | 1617   | 20404   | 2954   | 11100   | 1412   | 16855   | 2899   |
| 603.534 | 3.9  | [GL methyl(15:0/8:0)] 1-(14-methyl-pentadecanoyl)-2-(8-[3]-ladderane-octanyl)-sn-glycerol | 0.000 | 4.919   | 0.070 | 1.255   | 0.031 | 1.257  | 643542  | 20296  | 3165874 | 75048  | 3972260 | 350184 | 3978380 | 276769 |
| 606.448 | 4.5  | LysoPC(24:1(15Z))                                                                         | 0.043 | 1.759   | 0.003 | 4.946   | 0.000 | 16.524 | 18969   | 2607   | 33361   | 5281   | 164997  | 25511  | 551278  | 40693  |
| 613.159 | 17.4 | Glutathione disulfide                                                                     | 0.001 | 5.952   | 0.000 | 24.600  | 0.000 | 20.853 | 60336   | 6792   | 359117  | 47498  | 8834215 | 908168 | 7488535 | 730053 |
| 615.152 | 17.4 | CMP-N-acetylneuraminate                                                                   | 0.007 | #DIV/0! | 0.000 | 37.906  | 0.000 | 32.277 | 0       | 0      | 14698   | 3314   | 557132  | 53830  | 474395  | 48779  |
| 615.171 | 17.4 | [Fv] Safflomin C                                                                          | 0.026 | #DIV/0! | 0.000 | 112.807 | 0.000 | 90.846 | 0       | 0      | 1793    | 571    | 202306  | 21845  | 162921  | 17263  |
| 621.447 | 17.3 | [GP (15:0/15:0)] 1,2-dipentadecanoyl-sn-glycero-3-phosphate                               | 0.006 | 0.024   | 0.087 | 73.764  | 0.635 | 0.834  | 952963  | 203685 | 22614   | 6753   | 1668092 | 774996 | 18859   | 3444   |
| 622.070 | 17.4 | UDP-N-acetyl-D-mannosaminouronate                                                         | 0.018 | 11.178  | 0.322 | 0.678   | 0.531 | 1.212  | 14887   | 3742   | 166397  | 44121  | 112834  | 24863  | 201635  | 31256  |
| 631.352 | 9.9  | Remikiren                                                                                 | 0.046 | 0.651   | 0.266 | 2.991   | 0.289 | 1.308  | 19220   | 1969   | 12504   | 2179   | 37401   | 19839  | 16360   | 2657   |
| 635.141 | 17.4 | Actinorhodine                                                                             | 0.002 | 13.677  | 0.000 | 33.987  | 0.000 | 29.620 | 5153    | 864    | 70478   | 11307  | 2395342 | 287574 | 2087547 | 226820 |
| 651.533 | 3.8  | [GL (8:0/8:0)] 1-(8-[3]-ladderane-octanoyl-2-(8-[3]-ladderane-octanyl)-sn-glycerol        | 0.000 | 4.042   | 0.000 | 0.380   | 0.000 | 0.502  | 473039  | 17563  | 1911824 | 95290  | 725889  | 63628  | 958878  | 65655  |
| 664.115 | 14.2 | NAD+                                                                                      | 0.002 | 2.187   | 0.110 | 1.314   | 0.019 | 1.528  | 876648  | 39348  | 1916909 | 182379 | 2518756 | 283432 | 2929384 | 297045 |
| 666.131 | 13.3 | NADH                                                                                      | 0.009 | 2.221   | 0.001 | 2.477   | 0.001 | 3.351  | 32381   | 2657   | 71924   | 9816   | 178126  | 17264  | 241025  | 28750  |
| 672.539 | 3.8  | Galactosylceramide (d18:1/14:0)                                                           | 0.051 | 0.399   | 0.385 | 0.704   | 0.528 | 0.775  | 145221  | 33754  | 57940   | 15163  | 40802   | 11095  | 44931   | 12833  |
| 675.542 | 7.5  | [FA (32:0/2:0)] 1-(O-alpha-D-glucopyranosyl)-29-keto-(3R,31R)-dotriacontanediol           | 0.054 | 2.152   | 0.068 | 0.484   | 0.051 | 0.454  | 188302  | 10002  | 405147  | 86533  | 195999  | 47079  | 183878  | 30004  |
| 675.542 | 4.4  | [FA (32:0/2:0)] 1-(O-alpha-D-glucopyranosyl)-29-keto-(3R,31R)-dotriacontanediol           | 0.004 | 1.698   | 0.006 | 0.633   | 0.008 | 0.646  | 2398842 | 91188  | 4073426 | 354251 | 2580132 | 180099 | 2631100 | 191001 |
| 676.494 | 17.4 | PC(14:0/14:1(9Z))                                                                         | 0.001 | 15.780  | 0.138 | 0.640   | 0.929 | 1.028  | 5091    | 1235   | 80328   | 11534  | 51398   | 13708  | 82553   | 21354  |
| 678.505 | 4.2  | [PC (14:0/14:0)] 1,2-ditetradecanoyl-sn-glycero-3-phosphocholine                          | 0.010 | 56.793  | 0.000 | 5.810   | 0.000 | 11.158 | 6262    | 2039   | 355632  | 85688  | 2066192 | 185708 | 3968213 | 314615 |
| 681.212 | 17.3 | Canaliculitol                                                                             | 0.000 | 4.754   | 0.304 | 0.831   | 0.337 | 1.166  | 64944   | 11733  | 308742  | 32297  | 256485  | 35700  | 359991  | 39079  |
| 681.641 | 17.3 | [GL (20:0/20:0)] 1,2-dieicosanoyl-sn-glycerol                                             | 0.005 | 3.209   | 0.266 | 0.765   | 0.503 | 1.332  | 8618    | 363    | 27657   | 3917   | 21168   | 3867   | 36827   | 12265  |
| 689.557 | 4.4  | [SP (18:0/14:0)] N-(octadecanoyl)-tetradecasphing-4-enine-1-phosphoethanolamine           | 0.004 | 1.607   | 0.001 | 0.506   | 0.001 | 0.505  | 2514053 | 90205  | 4039779 | 310469 | 2044312 | 166892 | 2041816 | 131845 |
| 690.506 | 4.2  | PC(14:1(9Z)/15:0)                                                                         | 0.000 | 17.875  | 0.030 | 2.626   | 0.026 | 5.770  | 3371    | 1263   | 60256   | 6622   | 158218  | 32988  | 347674  | 91491  |
| 692.521 | 4.2  | [PE (16:0/16:0)] 1,2-dihexadecanoyl-sn-glycero-3-phosphoethanolamine                      | 0.001 | 41.032  | 0.001 | 2.385   | 0.000 | 2.870  | 21862   | 3475   | 897058  | 125752 | 2139431 | 196652 | 2574357 | 231475 |
| 692.557 | 4.2  | [PC (14:2/16:0)] 1-tetradecyl-2-hexadecanoyl-sn-glycero-3-phosphocholine                  | 0.003 | 3.262   | 0.037 | 1.510   | 0.375 | 1.208  | 351422  | 58222  | 1146455 | 159898 | 1731542 | 183013 | 1384612 | 199693 |
| 700.526 | 4.1  | PE(16:1(9Z)/P-18:1(11Z))                                                                  | 0.001 | 8.954   | 0.004 | 0.401   | 0.002 | 0.321  | 17057   | 4368   | 152735  | 19955  | 61278   | 13078  | 48996   | 9033   |

|         |     |                                                                                             |       |         |       |       |       |        |          |         |           |         |          |         |           |         |
|---------|-----|---------------------------------------------------------------------------------------------|-------|---------|-------|-------|-------|--------|----------|---------|-----------|---------|----------|---------|-----------|---------|
| 702.506 | 4.2 | PC(14:1(9Z)/16:1(9Z))                                                                       | 0.003 | #DIV/0! | 0.004 | 6.014 | 0.000 | 20.558 | 0        | 0       | 30908     | 5797    | 185873   | 31460   | 635420    | 65514   |
| 702.542 | 4.1 | PE(16:0/P-18:1(11Z))                                                                        | 0.034 | 2.856   | 0.702 | 0.900 | 0.054 | 0.433  | 237640   | 41978   | 678628    | 153425  | 610626   | 74284   | 293747    | 34102   |
| 703.573 | 7.5 | [SP (16:0)] N-(hexadecanoyl)-sphing-4-enine-1-phosphocholine                                | 0.006 | 2.054   | 0.003 | 0.429 | 0.001 | 0.345  | 5053328  | 204855  | 10380827  | 1177299 | 4449733  | 934464  | 3585745   | 644499  |
| 703.573 | 4.4 | [SP (16:0)] N-(hexadecanoyl)-sphing-4-enine-1-phosphocholine                                | 0.001 | 2.107   | 0.004 | 0.601 | 0.001 | 0.544  | 42348986 | 1726884 | 89245086  | 7223464 | 53605724 | 6223221 | 48552418  | 3836350 |
| 704.521 | 4.2 | [PC (14:0/16:1)] 1-tetradecanoyl-2-(9Z-hexadecenoyl)-sn-glycero-3-phosphocholine            | 0.000 | 22.946  | 0.001 | 1.989 | 0.000 | 2.762  | 167130   | 43630   | 3834927   | 360086  | 7626626  | 622404  | 10591371  | 750361  |
| 705.591 | 4.3 | [SP (16:0)] N-(hexadecanoyl)-sphinganine-1-phosphocholine                                   | 0.053 | 19.095  | 0.411 | 1.491 | 0.097 | 2.204  | 4177     | 4177    | 79768     | 29960   | 118951   | 34393   | 175784    | 42284   |
| 706.537 | 4.2 | [PC (15:0/15:0)] 1,2-dipentadecanoyl-sn-glycero-3-phosphocholine                            | 0.000 | 7.943   | 0.642 | 1.058 | 0.303 | 1.113  | 3248206  | 144200  | 25799966  | 1762342 | 27303941 | 2578211 | 28714790  | 2022593 |
| 706.573 | 4.2 | [PE (18:2/16:0)] 1-octadecyl-2-hexadecanoyl-sn-glycero-3-phosphoethanolamine                | 0.000 | 0.222   | 0.049 | 3.313 | 0.123 | 1.622  | 400172   | 27403   | 88726     | 15179   | 293968   | 79264   | 143949    | 28059   |
| 707.577 | 4.2 | 2-demethylmenaquinol-8                                                                      | 0.007 | 0.337   | 0.312 | 1.416 | 0.924 | 0.966  | 155552   | 25191   | 52363     | 13908   | 74148    | 14995   | 50586     | 11477   |
| 708.543 | 4.2 | [PR] bacteriohopane-,32,33,34-triol-35-cyclitol                                             | 0.000 | 21.231  | 0.689 | 1.046 | 0.239 | 1.127  | 113639   | 9942    | 2412673   | 161584  | 2523766  | 214804  | 2718506   | 182584  |
| 716.521 | 4.2 | [PE (16:0/18:2)] 1-hexadecanoyl-2-(9Z,12Z-octadecadienoyl)-sn-glycero-3-phosphoethanolamine | 0.000 | 123.821 | 0.008 | 0.610 | 0.033 | 0.832  | 9330     | 2471    | 1155220   | 64920   | 704755   | 111818  | 961165    | 38921   |
| 716.557 | 4.2 | PC(14:0/P-18:1(11Z))                                                                        | 0.000 | 3.155   | 0.095 | 1.240 | 0.154 | 1.185  | 376779   | 58714   | 1188675   | 92056   | 1473391  | 122487  | 1408860   | 108810  |
| 717.552 | 4.4 | SM(d18:0/16:1(9Z)(OH))                                                                      | 0.036 | 0.590   | 0.837 | 0.931 | 0.341 | 0.732  | 163778   | 11471   | 96629     | 23419   | 89957    | 21264   | 70705     | 9554    |
| 718.537 | 4.2 | [PE (16:0/18:1)] 1-Hexadecanoyl-2-(9Z-octadecenoyl)-sn-glycero-3-phosphoethanolamine        | 0.000 | 8.686   | 0.693 | 0.960 | 0.485 | 1.072  | 983473   | 44824   | 8542559   | 533192  | 8197762  | 657242  | 9155691   | 655536  |
| 719.577 | 4.2 | menaquinol-8                                                                                | 0.000 | 3.304   | 0.095 | 1.244 | 0.064 | 1.246  | 1310720  | 79700   | 4330688   | 304262  | 5387138  | 473117  | 5396195   | 406574  |
| 720.553 | 4.2 | [PC (15:0/16:0)] 1-pentadecanoyl-2-hexadecanoyl-sn-glycero-3-phosphocholine                 | 0.000 | 3.186   | 0.700 | 0.956 | 0.331 | 0.906  | 3914685  | 201207  | 12471734  | 734632  | 11919115 | 1175906 | 11304723  | 873649  |
| 720.590 | 4.2 | [PC (14:2/18:0)] 1-tetradecyl-2-octadecanoyl-sn-glycero-3-phosphocholine                    | 0.002 | 0.593   | 0.058 | 1.474 | 0.280 | 0.821  | 4571089  | 323305  | 2710422   | 78022   | 3995189  | 525394  | 2225289   | 396269  |
| 721.593 | 4.2 | dihydromenaquinone-8                                                                        | 0.000 | 0.365   | 0.004 | 2.453 | 0.534 | 0.772  | 1953910  | 153408  | 713431    | 172698  | 1749933  | 213214  | 550577    | 184914  |
| 722.511 | 4.1 | PE(18:4(6Z,9Z,12Z,15Z)/P-18:1(11Z))                                                         | 0.000 | 9.197   | 0.000 | 0.096 | 0.000 | 0.165  | 135896   | 63482   | 1249796   | 97051   | 120291   | 27181   | 206189    | 26952   |
| 726.542 | 4.1 | PE(18:2(9Z,12Z)/P-18:1(11Z))                                                                | 0.001 | 14.865  | 0.800 | 0.918 | 0.043 | 0.512  | 17817    | 11502   | 264836    | 41271   | 243138   | 72004   | 135596    | 37340   |
| 728.558 | 4.1 | PE(18:1(11Z)/P-18:1(11Z))                                                                   | 0.004 | 3.845   | 0.652 | 0.872 | 0.025 | 0.507  | 53175    | 8937    | 204459    | 31140   | 178268   | 46597   | 103588    | 20535   |
| 728.602 | 3.8 | Glucosylceramide (d18:1/18:0)                                                               | 0.035 | 0.397   | 0.411 | 1.382 | 0.954 | 0.974  | 257735   | 52088   | 102307    | 33430   | 141407   | 30868   | 99624     | 31015   |
| 730.537 | 4.2 | [PC (14:0/18:2)] 1-tetradecanoyl-2-(9Z,12Z-octadecadienoyl)-sn-glycero-3-phosphocholine     | 0.000 | 5.214   | 0.388 | 1.103 | 0.011 | 1.400  | 1732284  | 88513   | 9031782   | 739091  | 9958553  | 711873  | 12640801  | 892296  |
| 730.573 | 4.5 | [PE (18:1/18:1)] 1-(1Z-octadecenyl)-2-(9Z-octadecenoyl)-sn-glycero-3-phosphoethanolamine    | 0.044 | 3.864   | 0.153 | 0.512 | 0.060 | 0.330  | 22887    | 5720    | 88434     | 24531   | 45310    | 11048   | 29204     | 4384    |
| 732.552 | 4.2 | [PC (14:0/18:1)] 1-tetradecanoyl-2-(11Z-octadecenoyl)-sn-glycero-3-phosphocholine           | 0.000 | 4.953   | 0.423 | 0.949 | 0.322 | 1.086  | 20800325 | 853056  | 103016197 | 5424394 | 97786846 | 2976357 | 111886325 | 6532772 |
| 734.495 | 4.0 | PS(14:0/18:1(9Z))                                                                           | 0.000 | 3.222   | 0.302 | 1.390 | 0.036 | 1.919  | 12369    | 2350    | 39848     | 4038    | 55387    | 13125   | 76450     | 12941   |

|          |         |                                                                                                                  |       |        |       |       |       |       |          |         |          |         |          |         |          |         |
|----------|---------|------------------------------------------------------------------------------------------------------------------|-------|--------|-------|-------|-------|-------|----------|---------|----------|---------|----------|---------|----------|---------|
| 740.521  | 4.1     | [PE (16:0/20:4)] 1-hexadecanoyl-2-(5Z,8Z,11Z,14Z-eicosatetraenoyl)-sn-glycero-3-phosphoethanolamine              | 0.000 | 8.352  | 0.000 | 0.419 | 0.000 | 0.474 | 349528   | 59015   | 2919247  | 171382  | 1224012  | 86311   | 1384005  | 51506   |
| 742.535  | 4.2     | [PE (18:1/18:2)] 1-(9Z-octadecenyl)-2-(9Z,12Z-octadecadienyl)-sn-glycero-3-phosphoethanolamine                   | 0.000 | 11.675 | 0.001 | 0.467 | 0.000 | 0.526 | 182300   | 65763   | 2128357  | 110946  | 993114   | 206357  | 1119172  | 38923   |
| 742.573  | 4.2     | [PC (16:1/18:2)] 1-(1Z-hexadecenyl)-2-(9Z,12Z-octadecadienyl)-sn-glycero-3-phosphocholine                        | 0.000 | 10.741 | 0.007 | 0.429 | 0.044 | 0.716 | 91081    | 20203   | 978298   | 57613   | 420077   | 133060  | 700773   | 100800  |
| 744.081  | 16.7    | NADP+                                                                                                            | 0.001 | 5.057  | 0.205 | 1.253 | 0.039 | 1.596 | 20437    | 5280    | 103348   | 13126   | 129451   | 14071   | 164970   | 21510   |
| 744.496  | 20.2    | Piloceraine                                                                                                      | 0.024 | 8.827  | 0.228 | 0.576 | 0.066 | 0.351 | 4311     | 1004    | 38055    | 10556   | 21901    | 6503    | 13346    | 2140    |
| 744.552  | 4.2     | [PE (18:0/18:2)] 1-octadecanoyl-2-(9Z,12Z-octadecadienyl)-sn-glycero-3-phosphoethanolamine                       | 0.000 | 13.342 | 0.001 | 0.619 | 0.001 | 0.640 | 742900   | 40755   | 9911590  | 618038  | 6138855  | 478149  | 6339678  | 422913  |
| 744.589  | 4.2     | 1-Hexadecanoyl-2-(9Z-octadecenyl)-sn-glycero-3-phosphonocholine                                                  | 0.000 | 5.822  | 0.040 | 0.754 | 0.070 | 0.791 | 1675867  | 124341  | 9757366  | 773989  | 7360630  | 648908  | 7718068  | 637451  |
| 746.0967 | 17.0196 | NADPH                                                                                                            | 0.087 | 1.316  | 0.149 | 0.740 | 0.062 | 0.678 | 63155    | 3091    | 83107    | 9276    | 61481    | 10264   | 56387    | 8686    |
| 746.568  | 4.2     | [PC (15:0/18:1)] 1-pentadecanoyl-2-(11Z-octadecenyl)-sn-glycero-3-phosphocholine                                 | 0.000 | 5.821  | 0.054 | 0.792 | 0.153 | 0.858 | 5891914  | 251477  | 34297978 | 2388390 | 27151174 | 2225186 | 29437569 | 2027397 |
| 746.604  | 4.2     | PC(16:0/P-18:0)                                                                                                  | 0.007 | 2.587  | 0.453 | 1.125 | 0.617 | 1.080 | 9195500  | 439308  | 23785057 | 3358041 | 26750554 | 1640514 | 25684474 | 1342967 |
| 748.526  | 4.1     | [PE (16:1/22:6)] 1-O-(1Z-hexadecenyl)-2-(4Z,7Z,10Z,13Z,16Z,19Z-docosaheptaenyl)-sn-glycero-3-phosphoethanolamine | 0.000 | 2.193  | 0.001 | 0.541 | 0.000 | 0.273 | 4595668  | 216668  | 10077830 | 593266  | 5452707  | 695015  | 2753189  | 253071  |
| 748.585  | 4.2     | [PE (16:0/20:0)] 1-hexadecanoyl-2-eicosanoyl-sn-glycero-3-phosphoethanolamine                                    | 0.000 | 1.842  | 0.008 | 0.370 | 0.000 | 0.258 | 2768995  | 197065  | 5101436  | 226246  | 1885504  | 780613  | 1318326  | 547528  |
| 750.542  | 4.1     | PE(20:4(5Z,8Z,11Z,14Z)/P-18:1(11Z))                                                                              | 0.000 | 1.706  | 0.000 | 0.537 | 0.000 | 0.459 | 8941490  | 420174  | 15253332 | 821377  | 8185203  | 816201  | 7002431  | 549023  |
| 756.552  | 4.2     | [PC (16:0/18:3)] 1-hexadecanoyl-2-(9Z,12Z,15Z-octadecatrienyl)-sn-glycero-3-phosphocholine                       | 0.001 | 2.343  | 0.947 | 0.993 | 0.134 | 1.182 | 3376899  | 154241  | 7912806  | 627936  | 7856270  | 542171  | 9352365  | 620072  |
| 756.633  | 3.8     | Glucosylceramide (d18:1/20:0)                                                                                    | 0.022 | 0.223  | 0.025 | 2.916 | 0.202 | 1.641 | 218694   | 52082   | 48707    | 7961    | 142030   | 29945   | 79919    | 20472   |
| 758.568  | 4.2     | [PC (16:0/18:2)] 1-hexadecanoyl-2-(9Z,12Z-octadecadienyl)-sn-glycero-3-phosphocholine                            | 0.000 | 7.299  | 0.235 | 0.870 | 0.973 | 1.004 | 11197575 | 471243  | 81734280 | 6577733 | 71128217 | 5161690 | 82042963 | 5942018 |
| 760.511  | 3.9     | PS(16:0/18:2(9Z,12Z))                                                                                            | 0.000 | 8.615  | 0.000 | 0.222 | 0.000 | 0.352 | 35511    | 5802    | 305912   | 23256   | 67840    | 16963   | 107730   | 9360    |
| 762.526  | 3.9     | [PS (16:0/18:1)] 1-hexadecanoyl-2-(9Z-octadecenyl)-sn-glycero-3-phosphoserine                                    | 0.000 | 2.555  | 0.000 | 0.299 | 0.000 | 0.317 | 1478723  | 89766   | 3777682  | 122591  | 1131148  | 129363  | 1197922  | 91231   |
| 762.599  | 4.1     | [PC (18:0/16:0)] 1-octadecanoyl-2-hexadecanoyl-sn-glycero-3-phosphocholine                                       | 0.004 | 0.000  | 0.194 | 0.000 | 0.194 | 0.000 | 9459287  | 1908879 | 2982     | 1991    | 0        | 0       | 0        | 0       |
| 764.522  | 4.1     | [PE (16:0/22:6)] 1-hexadecanoyl-2-(4Z,7Z,10Z,13Z,16Z,19Z-docosaheptaenyl)-sn-glycero-3-phosphoethanolamine       | 0.000 | 14.864 | 0.000 | 0.326 | 0.000 | 0.400 | 108185   | 27214   | 1608061  | 61891   | 524737   | 125974  | 643544   | 117077  |
| 766.537  | 4.1     | PE(20:2(11Z,14Z)/18:3(6Z,9Z,12Z))                                                                                | 0.000 | 25.532 | 0.000 | 0.375 | 0.000 | 0.447 | 223884   | 73861   | 5716219  | 393694  | 2142891  | 182417  | 2553929  | 151750  |
| 766.572  | 4.2     | [PC (P-16:0/20:4)] 1-(1Z-hexadecenyl)-2-(5Z,8Z,11Z,14Z-eicosatetraenyl)-sn-glycero-3-phosphocholine              | 0.000 | 0.558  | 0.343 | 0.896 | 0.031 | 0.749 | 11030694 | 558606  | 6154030  | 504544  | 5515277  | 392407  | 4607039  | 327823  |
| 768.552  | 4.1     | [PE (18:0/20:4)] 1-octadecanoyl-2-(5Z,8Z,11Z,14Z-eicosatetraenyl)-sn-glycero-3-phosphoethanolamine               | 0.000 | 2.425  | 0.000 | 0.524 | 0.000 | 0.484 | 7225857  | 333852  | 17519672 | 927223  | 9173026  | 858235  | 8476912  | 609435  |

|         |      |                                                                                                                 |       |           |       |       |       |       |          |         |           |         |          |          |           |         |
|---------|------|-----------------------------------------------------------------------------------------------------------------|-------|-----------|-------|-------|-------|-------|----------|---------|-----------|---------|----------|----------|-----------|---------|
| 768.588 | 4.2  | PC(18:2(9Z,12Z)/P-18:1(11Z))                                                                                    | 0.000 | 0.485     | 0.370 | 0.901 | 0.046 | 0.771 | 38838385 | 1729237 | 18842757  | 1521488 | 16974615 | 1281000  | 14529328  | 1086263 |
| 770.569 | 4.2  | PC(15:0/20:3(5Z,8Z,11Z))                                                                                        | 0.002 | 320.017   | 0.068 | 0.586 | 0.082 | 0.643 | 12928    | 6835    | 4137306   | 679520  | 2422511  | 468632   | 2661585   | 115112  |
| 770.605 | 4.2  | PC(18:1(11Z)/P-18:1(11Z))                                                                                       | 0.000 | 14855.241 | 0.002 | 0.586 | 0.001 | 0.561 | 487      | 487     | 7238151   | 556683  | 4238317  | 383678   | 4059904   | 322527  |
| 771.608 | 4.2  | demethylmenaquinone-9                                                                                           | 0.000 | 47.594    | 0.002 | 0.583 | 0.001 | 0.537 | 76064    | 9769    | 3620179   | 281639  | 2110348  | 187214   | 1942530   | 149634  |
| 772.583 | 4.2  | [PE (18:0/20:2)] 1-octadecanoyl-2-(11Z,14Z-eicosadienoyl)-sn-glycero-3-phosphoethanolamine                      | 0.000 | 14.308    | 0.014 | 0.710 | 0.104 | 0.823 | 1039623  | 141329  | 14874836  | 1147340 | 10568295 | 818233   | 12246527  | 903031  |
| 772.620 | 4.2  | [PC (18:1/18:0)] 1-(1Z-octadecenyl)-2-(9Z-octadecenyl)-sn-glycero-3-phosphocholine                              | 0.000 | 8.554     | 0.007 | 0.684 | 0.006 | 0.693 | 1103691  | 139694  | 9441109   | 661744  | 6456750  | 563116   | 6539003   | 496351  |
| 773.623 | 4.2  | demethylmenaquinol-9                                                                                            | 0.000 | 15.757    | 0.004 | 0.666 | 0.003 | 0.673 | 289740   | 78512   | 4565304   | 301518  | 3042497  | 287004   | 3072861   | 225753  |
| 774.599 | 4.2  | [PE (16:0/22:1)] 1-hexadecanoyl-2-(13Z-docosenoyl)-sn-glycero-3-phosphoethanolamine                             | 0.000 | 5.537     | 0.010 | 0.715 | 0.002 | 0.667 | 4205574  | 198156  | 23284272  | 1384028 | 16647679 | 1553280  | 15541641  | 1177268 |
| 774.636 | 4.2  | PC(18:0/P-18:0)                                                                                                 | 0.007 | 3.905     | 0.024 | 7.519 | 0.265 | 2.747 | 32598    | 7740    | 127304    | 22759   | 957254   | 261071   | 349756    | 176551  |
| 776.557 | 4.0  | [PE (18:1/22:6)] 1-(1Z-octadecenyl)-2-(4Z,7Z,10Z,13Z,16Z,19Z-docosaheptaenoyl)-sn-glycero-3-phosphoethanolamine | 0.000 | 2.010     | 0.000 | 0.197 | 0.000 | 0.156 | 2624580  | 154618  | 5276609   | 209759  | 1040554  | 202076   | 820785    | 125267  |
| 777.561 | 4.0  | [PG (18:0/18:1)] 1-octadecanoyl-2-(9Z-octadecenyl)-sn-glycero-3-phospho-(1'-sn-glycerol)                        | 0.005 | 1.762     | 0.000 | 0.307 | 0.000 | 0.205 | 1267834  | 63902   | 2233470   | 210503  | 685699   | 159906   | 458844    | 46922   |
| 779.608 | 21.7 | Decaprenol phosphate                                                                                            | 0.012 | 3.212     | 0.068 | 3.003 | 0.016 | 4.941 | 16970    | 4328    | 54510     | 10106   | 163717   | 47078    | 269312    | 60420   |
| 780.551 | 4.2  | [PC (16:1/20:4)] 1-(9Z-hexadecenyl)-2-(5Z,8Z,11Z,14Z-eicosatetraenyl)-sn-glycero-3-phosphocholine               | 0.001 | 2.335     | 0.275 | 0.886 | 0.750 | 1.035 | 5092454  | 272206  | 11890658  | 961857  | 10538159 | 651678   | 12310547  | 845960  |
| 780.588 | 4.1  | PE(22:4(7Z,10Z,13Z,16Z)/P-18:0)                                                                                 | 0.007 | 0.727     | 0.234 | 0.838 | 0.001 | 0.399 | 2892921  | 138562  | 2103230   | 183109  | 1763515  | 195442   | 838480    | 214866  |
| 782.567 | 4.2  | [PC (16:0/20:4)] 1-hexadecanoyl-2-(5Z,8Z,11Z,14Z-eicosatetraenyl)-sn-glycero-3-phosphocholine                   | 0.017 | 1.385     | 0.131 | 0.841 | 0.615 | 0.947 | 59039125 | 2599935 | 81770434  | 6624135 | 68749636 | 4039639  | 77473071  | 4932306 |
| 784.509 | 3.9  | [PS (18:2/18:2)] 1,2-di-(9Z,12Z-octadecadienyl)-sn-glycero-3-phosphoserine                                      | 0.000 | 1.690     | 0.000 | 0.295 | 0.000 | 0.502 | 207845   | 16893   | 351205    | 17711   | 103616   | 20705    | 176414    | 10164   |
| 784.584 | 4.2  | PC(18:2(9Z,12Z)/18:1(9Z))                                                                                       | 0.000 | 4.581     | 0.044 | 0.765 | 0.470 | 0.920 | 10837590 | 476431  | 49645370  | 4092311 | 37998126 | 2792824  | 45686920  | 3302335 |
| 786.162 | 11.4 | FAD                                                                                                             | 0.006 | 5.497     | 0.686 | 0.901 | 0.110 | 1.375 | 11104    | 2677    | 61040     | 11160   | 55022    | 9158     | 83949     | 6049    |
| 786.528 | 3.9  | [PS (18:1/18:2)] 1-(9Z-octadecenyl)-2-(9Z,12Z-octadecadienyl)-sn-glycero-3-phosphoserine                        | 0.009 | 3.595     | 0.250 | 0.587 | 0.022 | 0.410 | 66617    | 18241   | 239493    | 43660   | 140487   | 67222    | 98246     | 12673   |
| 786.599 | 4.2  | [PC (18:1/18:1)] 1-(9Z-octadecenyl)-2-(9Z-octadecenyl)-sn-glycero-3-phosphocholine                              | 0.000 | 8.411     | 0.001 | 0.525 | 0.001 | 0.675 | 18885418 | 933003  | 158843698 | 8918327 | 83346312 | 12740651 | 107206989 | 3373746 |
| 787.667 | 7.2  | SM(d18:1/22:0)                                                                                                  | 0.044 | 0.251     | 0.040 | 0.387 | 0.015 | 0.228 | 411384   | 115433  | 103120    | 22330   | 39894    | 13064    | 23549     | 5113    |
| 787.668 | 4.3  | SM(d18:1/22:0)                                                                                                  | 0.000 | 0.121     | 0.276 | 0.441 | 0.126 | 0.202 | 1944618  | 156152  | 234341    | 101680  | 103378   | 43506    | 47281     | 15037   |
| 788.542 | 3.9  | [PS (18:1/18:1)] 1,2-di-(9E-octadecenyl)-sn-glycero-3-phosphoserine                                             | 0.000 | 3.552     | 0.000 | 0.197 | 0.000 | 0.223 | 1529240  | 127629  | 5431788   | 152452  | 1072626  | 130528   | 1213765   | 88231   |
| 788.615 | 4.2  | [PC (18:0/18:1)] 1-octadecanoyl-2-(9Z-octadecenyl)-sn-glycero-3-phosphocholine                                  | 0.002 | 2.812     | 0.737 | 0.933 | 0.024 | 0.618 | 17543304 | 993575  | 49338569  | 5375315 | 46025999 | 7889333  | 30485282  | 4560488 |



|         |      |                                                                                                                |       |         |       |       |       |       |          |         |          |         |          |         |          |         |
|---------|------|----------------------------------------------------------------------------------------------------------------|-------|---------|-------|-------|-------|-------|----------|---------|----------|---------|----------|---------|----------|---------|
| 788.615 | 11.2 | [PC (18:0/18:1)] 1-octadecanoyl-2-(9Z-octadecenoyl)-sn-glycero-3-phosphocholine                                | 0.004 | 6.813   | 0.189 | 1.825 | 0.057 | 1.822 | 2688     | 172     | 18313    | 3076    | 33424    | 9723    | 33364    | 5938    |
| 789.545 | 3.9  | [PG (8:0/8:0)] 1-(8-[5]-ladderane-octanoyl)-2-(8-[3]-ladderane-octanoyl)-sn-glycero-3-phospho-(1'-sn-glycerol) | 0.000 | 3.458   | 0.000 | 0.193 | 0.000 | 0.222 | 729060   | 67819   | 2520972  | 70836   | 486982   | 68645   | 560633   | 41867   |
| 790.557 | 3.9  | PS(18:0/18:1(9Z))                                                                                              | 0.000 | 2.024   | 0.000 | 0.208 | 0.000 | 0.179 | 7595947  | 489407  | 15371330 | 388631  | 3204341  | 423004  | 2756318  | 360660  |
| 790.574 | 4.1  | PC(20:5(5Z,8Z,11Z,14Z,17Z)/P-18:1(11Z))                                                                        | 0.027 | 0.496   | 0.867 | 1.055 | 0.404 | 0.706 | 2283162  | 318565  | 1131687  | 310012  | 1193942  | 182862  | 798611   | 219861  |
| 791.560 | 5.7  | [PG (8:0/8:0)] 1-(8-[3]-ladderane-octanoyl)-2-(8-[3]-ladderane-octanoyl)-sn-glycero-3-phospho-(1'-sn-glycerol) | 0.038 | 4.692   | 0.333 | 0.587 | 0.047 | 0.265 | 15234    | 3208    | 71477    | 20131   | 41955    | 20895   | 18954    | 5356    |
| 791.561 | 3.9  | [PG (8:0/8:0)] 1-(8-[3]-ladderane-octanoyl)-2-(8-[3]-ladderane-octanoyl)-sn-glycero-3-phospho-(1'-sn-glycerol) | 0.000 | 1.978   | 0.000 | 0.214 | 0.000 | 0.188 | 3578240  | 217192  | 7076786  | 163475  | 1515528  | 198436  | 1329047  | 165168  |
| 792.551 | 4.1  | [PE (18:0/22:6)] 1-octadecanoyl-2-(4Z,7Z,10Z,13Z,16Z,19Z-docosaheptaenoyl)-sn-glycero-3-phosphoethanolamine    | 0.004 | 3.283   | 0.016 | 0.523 | 0.015 | 0.517 | 2271236  | 113028  | 7455627  | 1022603 | 3897360  | 394564  | 3853831  | 304102  |
| 792.572 | 3.8  | [PS (16:0/20:0)] 1-hexadecanoyl-2-eicosanoyl-sn-glycero-3-phosphoserine                                        | 0.027 | 6.984   | 0.793 | 0.914 | 0.763 | 1.103 | 44122    | 10953   | 308145   | 85896   | 281511   | 47567   | 340010   | 55382   |
| 794.568 | 4.1  | PC(15:0/22:5(4Z,7Z,10Z,13Z,16Z))                                                                               | 0.000 | 42.086  | 0.000 | 0.421 | 0.000 | 0.447 | 239032   | 78848   | 10059852 | 557896  | 4238280  | 349217  | 4494654  | 292291  |
| 794.604 | 4.1  | [PC (18:1/20:4)] 1-(12-octadecenyl)-2-(5Z,8Z,11Z,14Z-eicosatetraenyl)-sn-glycero-3-phosphocholine              | 0.000 | 0.532   | 0.035 | 0.746 | 0.007 | 0.648 | 49417600 | 2428662 | 26300588 | 2225281 | 19608442 | 1515630 | 17044472 | 1220234 |
| 796.584 | 4.1  | PE(18:0/22:4(7Z,10Z,13Z,16Z))                                                                                  | 0.000 | 57.557  | 0.011 | 0.726 | 0.015 | 0.746 | 150879   | 22040   | 8684186  | 591323  | 6303598  | 466119  | 6480350  | 441904  |
| 798.600 | 4.2  | PE(18:1(11Z)/22:2(13Z,16Z))                                                                                    | 0.000 | 122.178 | 0.004 | 0.653 | 0.023 | 0.750 | 35224    | 14441   | 4303626  | 324674  | 2808611  | 221082  | 3226995  | 218752  |
| 800.615 | 4.1  | [PE (20:0/20:2)] 1-eicosanoyl-2-(11Z,14Z-eicosadienoyl)-sn-glycero-3-phosphoethanolamine                       | 0.000 | 26.034  | 0.010 | 0.697 | 0.030 | 0.762 | 226341   | 64772   | 5892605  | 415004  | 4104655  | 384019  | 4489112  | 366659  |
| 801.564 | 3.8  | PG(18:0/20:3(5Z,8Z,11Z))                                                                                       | 0.007 | 37.551  | 0.013 | 0.175 | 0.013 | 0.167 | 4444     | 1796    | 166865   | 37132   | 29244    | 6917    | 27926    | 3565    |
| 803.520 | 3.7  | [PG (8:0/8:0)] 1-(8-[5]-ladderane-octanoyl)-2-(8-[3]-ladderane-octanoyl)-sn-glycero-3-phospho-(1'-sn-glycerol) | 0.001 | 6.368   | 0.001 | 0.267 | 0.003 | 0.377 | 366444   | 24920   | 2333657  | 278167  | 623814   | 52614   | 879136   | 56388   |
| 804.573 | 3.8  | [GP (18:0/18:0)] 1-octadecanoyl-2-(9Z-octadecenoyl)-sn-glycero-3-phosphothreonine                              | 0.001 | 2.679   | 0.000 | 0.191 | 0.000 | 0.109 | 58966    | 9835    | 157964   | 16936   | 30112    | 7766    | 17184    | 3689    |
| 805.536 | 3.7  | [PG (8:0/8:0)] 1-(8-[3]-ladderane-octanoyl)-2-(8-[3]-ladderane-octanoyl)-sn-glycero-3-phospho-(1'-sn-glycerol) | 0.001 | 5.060   | 0.001 | 0.258 | 0.003 | 0.402 | 213361   | 18409   | 1079596  | 121640  | 278838   | 45222   | 433645   | 32301   |
| 806.567 | 4.1  | [PC (16:0/22:6)] 1-hexadecanoyl-2-(4Z,7Z,10Z,13Z,16Z,19Z-docosaheptaenoyl)-sn-glycero-3-phosphocholine         | 0.001 | 2.356   | 0.013 | 0.685 | 0.235 | 0.864 | 13532411 | 642079  | 31888238 | 2712667 | 21846582 | 1586205 | 27556831 | 2063775 |
| 808.511 | 3.9  | PS(20:3(8Z,11Z,14Z)/18:3(9Z,12Z,15Z))                                                                          | 0.002 | 9.859   | 0.764 | 1.077 | 0.002 | 1.805 | 19084    | 3676    | 188140   | 29630   | 202603   | 36184   | 339548   | 17962   |
| 808.583 | 4.1  | [PC (18:1/20:4)] 1-(9Z-octadecenoyl)-2-(5Z,8Z,11Z,14Z-eicosatetraenoyl)-sn-glycero-3-phosphocholine            | 0.001 | 2.184   | 0.022 | 0.720 | 0.327 | 0.889 | 32952015 | 1565037 | 71979679 | 6098641 | 51791625 | 3723364 | 64009299 | 4705802 |
| 810.131 | 12.3 | Acetyl-CoA                                                                                                     | 0.004 | 4.363   | 0.480 | 1.213 | 0.000 | 2.257 | 7449     | 1664    | 32503    | 5394    | 39430    | 7700    | 73358    | 4609    |
| 810.526 | 3.8  | 1-20:2-2-18:3-phosphatidylserine                                                                               | 0.000 | 3.432   | 0.000 | 0.186 | 0.000 | 0.291 | 338941   | 30936   | 1163339  | 68173   | 216060   | 30770   | 338217   | 42485   |
| 812.541 | 3.8  | [PS (18:0/20:4)] 1-octadecanoyl-2-(5Z,8Z,11Z,14Z-eicosatetraenoyl)-sn-glycero-3-phosphoserine                  | 0.001 | 1.336   | 0.000 | 0.162 | 0.000 | 0.197 | 6785006  | 340096  | 9066618  | 292920  | 1467731  | 128029  | 1782360  | 108356  |

|         |      |                                                                                                                 |       |         |       |       |       |       |         |        |          |         |          |         |          |         |
|---------|------|-----------------------------------------------------------------------------------------------------------------|-------|---------|-------|-------|-------|-------|---------|--------|----------|---------|----------|---------|----------|---------|
| 812.615 | 4.1  | PC(16:1(9Z)/22:2(13Z,16Z))                                                                                      | 0.000 | #DIV/0! | 0.156 | 0.840 | 0.086 | 0.821 | 0       | 0      | 23435443 | 1668250 | 19693670 | 1774178 | 19245841 | 1429895 |
| 814.630 | 4.1  | [PC (18:0/20:2)] 1-octadecanoyl-2-(11Z,14Z-eicosadienoyl)-sn-glycero-3-phosphocholine                           | 0.000 | 37.217  | 0.087 | 0.795 | 0.146 | 0.850 | 243492  | 76459  | 9061968  | 579093  | 7206503  | 778447  | 7700869  | 639529  |
| 816.572 | 3.8  | 1-20:0-2-18:2-phosphatidylserine                                                                                | 0.000 | 5.066   | 0.000 | 0.138 | 0.000 | 0.178 | 170555  | 23618  | 864055   | 29429   | 118840   | 31070   | 154101   | 39185   |
| 818.566 | 4.1  | PE(20:1(11Z)/22:6(4Z,7Z,10Z,13Z,16Z,19Z))                                                                       | 0.033 | 5.115   | 0.153 | 0.529 | 0.709 | 1.117 | 22600   | 3185   | 115596   | 31781   | 61127    | 9648    | 129164   | 14249   |
| 818.590 | 3.8  | 1-20:0-2-18:1-phosphatidylserine                                                                                | 0.001 | 3.346   | 0.000 | 0.175 | 0.000 | 0.211 | 88782   | 18211  | 297094   | 33727   | 51889    | 16717   | 62541    | 12479   |
| 820.584 | 4.1  | PE(20:0/22:6(4Z,7Z,10Z,13Z,16Z,19Z))                                                                            | 0.000 | 65.367  | 0.017 | 0.548 | 0.392 | 0.872 | 30061   | 12174  | 1965015  | 202963  | 1077523  | 231574  | 1714167  | 193200  |
| 820.619 | 4.1  | PC(22:4(7Z,10Z,13Z,16Z)/P-18:1(11Z))                                                                            | 0.034 | 1.269   | 0.002 | 0.618 | 0.001 | 0.572 | 6052148 | 322329 | 7681141  | 552192  | 4746417  | 392369  | 4393633  | 317952  |
| 821.530 | 3.8  | PG(18:1(11Z)/22:6(4Z,7Z,10Z,13Z,16Z,19Z))                                                                       | 0.000 | 8.558   | 0.000 | 0.126 | 0.000 | 0.163 | 488042  | 37702  | 4176819  | 404702  | 526630   | 45219   | 679558   | 53415   |
| 823.547 | 3.7  | [PG (18:0/22:6)] 1-octadecanoyl-2-(4Z,7Z,10Z,13Z,16Z,19Z-docosahexaenoyl)-sn-glycero-3-phospho-(1'-sn-glycerol) | 0.000 | 7.487   | 0.000 | 0.130 | 0.000 | 0.156 | 273416  | 16706  | 2047161  | 200983  | 266581   | 24103   | 319952   | 26868   |
| 824.555 | 4.3  | [SP] (3'-sulfo)Galbeta-Cer(d18:0/2-OH-18:0)                                                                     | 0.020 | 10.874  | 0.029 | 0.193 | 0.032 | 0.212 | 17433   | 4771   | 189570   | 50952   | 36554    | 9525    | 40225    | 7315    |
| 824.651 | 4.1  | PC(22:2(13Z,16Z)/P-18:1(11Z))                                                                                   | 0.001 | 0.425   | 0.135 | 1.857 | 0.221 | 1.593 | 1160768 | 80087  | 493376   | 102246  | 916255   | 228394  | 785866   | 193747  |
| 826.631 | 4.1  | PE(18:2(9Z,12Z)/24:1(15Z))                                                                                      | 0.000 | 14.486  | 0.383 | 1.332 | 0.847 | 0.959 | 13199   | 3972   | 191213   | 22866   | 254745   | 63735   | 183350   | 32247   |
| 828.255 | 17.4 | Deshydroxy-C-1027 chromophore                                                                                   | 0.000 | 6.077   | 0.407 | 0.895 | 0.164 | 1.203 | 692980  | 42001  | 4211460  | 267146  | 3769158  | 430367  | 5065584  | 487695  |
| 832.582 | 4.1  | [PC (18:1/22:6)] 1-(11Z-octadecenoyl)-2-(4Z,7Z,10Z,13Z,16Z,19Z-docosahexaenoyl)-sn-glycero-3-phosphocholine     | 0.000 | 2.810   | 0.002 | 0.545 | 0.081 | 0.794 | 6291022 | 371516 | 17676156 | 1513805 | 9636543  | 719069  | 14038115 | 1066821 |
| 832.588 | 17.4 | [PC (18:1/22:6)] 1-(11Z-octadecenoyl)-2-(4Z,7Z,10Z,13Z,16Z,19Z-docosahexaenoyl)-sn-glycero-3-phosphocholine     | 0.000 | 7.079   | 0.067 | 3.913 | 0.014 | 6.790 | 2645    | 1470   | 18724    | 2394    | 73272    | 23434   | 127135   | 29417   |
| 834.525 | 3.8  | PS(18:1(9Z)/22:6(4Z,7Z,10Z,13Z,16Z,19Z))                                                                        | 0.000 | 1.497   | 0.000 | 0.253 | 0.000 | 0.377 | 579990  | 27315  | 868089   | 31947   | 219721   | 15239   | 327305   | 24290   |
| 834.599 | 4.1  | [PC (18:1/22:5)] 1-(11Z-octadecenoyl)-2-(7Z,10Z,13Z,16Z,19Z-docosapentaenoyl)-sn-glycero-3-phosphocholine       | 0.000 | 3.012   | 0.006 | 0.655 | 0.129 | 0.832 | 9907410 | 522500 | 29840641 | 2377923 | 19557957 | 1535773 | 24819354 | 1866166 |
| 836.541 | 5.4  | [PS (18:0/22:6)] 1-octadecanoyl-2-(4Z,7Z,10Z,13Z,16Z,19Z-docosahexaenoyl)-sn-glycero-3-phosphoserine            | 0.043 | 4.584   | 0.151 | 0.499 | 0.298 | 0.653 | 8812    | 2198   | 40391    | 11761   | 20149    | 3465    | 26369    | 3550    |
| 836.542 | 3.8  | [PS (18:0/22:6)] 1-octadecanoyl-2-(4Z,7Z,10Z,13Z,16Z,19Z-docosahexaenoyl)-sn-glycero-3-phosphoserine            | 0.000 | 3.270   | 0.000 | 0.265 | 0.000 | 0.321 | 4272276 | 218613 | 13969940 | 686775  | 3703315  | 329537  | 4479370  | 279062  |
| 836.615 | 4.1  | [PC (18:0/22:5)] 1-octadecanoyl-2-(4Z,7Z,10Z,13Z,16Z-docosapentaenoyl)-sn-glycero-3-phosphocholine              | 0.000 | 2.604   | 0.005 | 0.644 | 0.024 | 0.738 | 9534439 | 482168 | 24825470 | 1985124 | 15991494 | 1319726 | 18332575 | 1311154 |
| 838.557 | 3.8  | PS(18:0/22:5(7Z,10Z,13Z,16Z,19Z))                                                                               | 0.000 | 3.205   | 0.000 | 0.187 | 0.000 | 0.218 | 4754168 | 278631 | 15235261 | 822768  | 2841561  | 276339  | 3314066  | 222007  |
| 838.630 | 4.1  | [PC (18:0/22:4)] 1-octadecanoyl-2-(7Z,10Z,13Z,16Z-docosatetraenoyl)-sn-glycero-3-phosphocholine                 | 0.000 | 2.243   | 0.012 | 0.714 | 0.026 | 0.768 | 3663831 | 227909 | 8217194  | 533885  | 5865092  | 555584  | 6307736  | 498195  |
| 840.573 | 3.8  | 1-22:1-2-18:3-phosphatidylserine                                                                                | 0.000 | 2.316   | 0.000 | 0.201 | 0.000 | 0.217 | 2260421 | 141206 | 5234182  | 260090  | 1052231  | 101401  | 1136606  | 84393   |

|          |      |                                                                                                                             |         |         |       |         |       |         |         |        |         |        |         |        |         |        |
|----------|------|-----------------------------------------------------------------------------------------------------------------------------|---------|---------|-------|---------|-------|---------|---------|--------|---------|--------|---------|--------|---------|--------|
| 842.661  | 4.2  | [PC (20:0/20:2)] 1-eicosanoyl-2-(11Z,14Z-eicosadienoyl)-sn-glycero-3-phosphocholine                                         | 0.003   | 37.410  | 0.172 | 2.751   | 0.034 | 2.561   | 1834    | 1250   | 68601   | 12505  | 188726  | 75062  | 175655  | 37314  |
| 848.613  | 4.2  | PE(20:5(5Z,8Z,11Z,14Z,17Z)/24:1(15Z))                                                                                       | 0.003   | 13.524  | 0.008 | 0.301   | 0.008 | 0.276   | 19862   | 3422   | 268605  | 46695  | 80936   | 27201  | 74244   | 13199  |
| 854.567  | 4.1  | [PC (20:5/22:5)] 1-(5Z,8Z,11Z,14Z,17Z-eicosapentaenoyl)-2-(7Z,10Z,13Z,16Z,19Z-docosapentaenoyl)-sn-glycero-3-phosphocholine | 0.002   | 1.716   | 0.000 | 0.086   | 0.000 | 0.350   | 1595233 | 100093 | 2738074 | 222382 | 234965  | 76915  | 957568  | 46731  |
| 859.486  | 3.8  | Avermectin B1b                                                                                                              | 0.000   | 17.007  | 0.000 | 0.077   | 0.000 | 0.090   | 17908   | 4870   | 304551  | 34078  | 23385   | 2836   | 27395   | 7850   |
| 863.562  | 3.8  | [PI (18:0/18:0)] 1,2-di-(9Z-octadecenoyl)-sn-glycero-3-phospho-(1'-myo-inositol)                                            | 0.013   | 1.382   | 0.000 | 0.491   | 0.001 | 0.544   | 763978  | 48789  | 1056137 | 79108  | 518102  | 57194  | 574102  | 59584  |
| 866.661  | 4.1  | PC(18:3(6Z,9Z,12Z)/24:1(15Z))                                                                                               | 0.018   | 3.088   | 0.999 | 1.001   | 0.846 | 0.948   | 98447   | 24026  | 303998  | 60906  | 304155  | 90244  | 288236  | 50589  |
| 867.593  | 3.8  | [PI (18:0/18:0)] 1,2-dioctadecanoyl-sn-glycero-3-phospho-(1'-myo-inositol)                                                  | 0.000   | 4.913   | 0.000 | 0.061   | 0.000 | 0.082   | 87989   | 17467  | 432262  | 35130  | 26183   | 7113   | 35653   | 12530  |
| 868.606  | 3.8  | 1-24:1-2-18:3-phosphatidylserine                                                                                            | 0.003   | 3.107   | 0.001 | 0.050   | 0.001 | 0.049   | 77993   | 9534   | 242360  | 31766  | 12019   | 2903   | 11884   | 1661   |
| 878.568  | 4.1  | [PC (22:6/22:6)] 1,2-di-(4Z,7Z,10Z,13Z,16Z,19Z-docosahexaenoyl)-sn-glycero-3-phosphocholine                                 | 0.007   | 5.570   | 0.006 | 0.124   | 0.007 | 0.206   | 47952   | 6353   | 267105  | 50853  | 33161   | 6046   | 54993   | 16801  |
| 885.546  | 3.8  | PI(16:0/22:5(4Z,7Z,10Z,13Z,16Z))                                                                                            | 0.000   | 3.381   | 0.000 | 0.145   | 0.000 | 0.200   | 1522687 | 81525  | 5148783 | 470315 | 746632  | 57639  | 1030836 | 60365  |
| 887.562  | 3.8  | [PI (18:0/20:4)] 1-octadecanoyl-2-(5Z,8Z,11Z,14Z-eicosatetraenoyl)-sn-glycero-3-phospho-(1'-myo-inositol)                   | 0.000   | 2.398   | 0.000 | 0.166   | 0.000 | 0.179   | 3678084 | 228236 | 8818608 | 530396 | 1462597 | 147251 | 1577097 | 117719 |
| 888.647  | 13.6 | PC(22:1(13Z)/22:6(4Z,7Z,10Z,13Z,16Z,19Z))                                                                                   | 0.042   | 2.262   | 0.689 | 1.193   | 0.737 | 1.085   | 8344    | 3386   | 18871   | 2968   | 22520   | 8168   | 20471   | 3539   |
| 890.659  | 4.1  | Lactosylceramide(d18)                                                                                                       | 0.002   | #DIV/0! | 0.023 | 0.411   | 0.816 | 1.062   | 0       | 0      | 35853   | 6014   | 14730   | 5060   | 38076   | 7075   |
| 891.512  | 3.7  | Avermectin A2b                                                                                                              | 0.000   | 1.668   | 0.000 | 0.063   | 0.000 | 0.130   | 959367  | 50663  | 1599805 | 93913  | 100674  | 19120  | 207639  | 18746  |
| 892.677  | 4.1  | PC(20:4(5Z,8Z,11Z,14Z)/24:1(15Z))                                                                                           | 0.013   | 38.352  | 0.459 | 0.767   | 0.038 | 2.457   | 1648    | 1647   | 63190   | 16396  | 48491   | 9374   | 155280  | 32682  |
| 908.532  | 3.9  | 7-hydroxy-chlorophyll a                                                                                                     | 0.001   | 3.642   | 0.001 | 0.197   | 0.002 | 0.339   | 41559   | 8237   | 151346  | 19014  | 29849   | 4896   | 51380   | 6847   |
| 988.763  | 19.3 | Lactosylceramide(d18)                                                                                                       | 0.012   | 4.343   | 0.474 | 1.430   | 0.084 | 2.511   | 77380   | 8305   | 336069  | 68139  | 480509  | 177507 | 843990  | 234490 |
| 613.1384 | 17.4 | CMP-N-acetylneuraminate                                                                                                     | #DIV/0! | #DIV/0! | 0.008 | #DIV/0! | 0.006 | #DIV/0! | 0       | 0      | 0       | 0      | 87461   | 20597  | 73352   | 16025  |
| 611.1449 | 17.4 | Glutathione disulfide                                                                                                       | 0.012   | 70.861  | 0.008 | 78.553  | 0.007 | 71.932  | 224     | 143    | 15874   | 4067   | 1382853 | 321325 | 1141846 | 252763 |
| 606.0744 | 15.0 | UDP-N-acetyl-D-glucosamine                                                                                                  | 0.107   | 3.312   | 0.008 | 33.266  | 0.016 | 46.857  | 1890    | 501    | 6260    | 2216   | 228890  | 52083  | 293334  | 80379  |
| 565.0477 | 16.1 | UDP-glucose                                                                                                                 | 0.897   | 1.058   | 0.002 | 24.657  | 0.007 | 50.760  | 3004    | 1026   | 3178    | 816    | 84678   | 13236  | 161324  | 36510  |
| 540.0537 | 14.2 | Cyclic ADP-ribose                                                                                                           | 0.003   | 2.527   | 0.006 | 2.457   | 0.002 | 3.342   | 81280   | 2983   | 205394  | 23267  | 517821  | 72865  | 686404  | 85933  |
| 522.9671 | 14.6 | XTP                                                                                                                         | 0.000   | 0.514   | 0.555 | 1.312   | 0.968 | 0.983   | 41901   | 1935   | 21536   | 1473   | 27568   | 9444   | 21166   | 8793   |
| 519.0717 | 14.6 | Pseudohypericin                                                                                                             | 0.178   | #DIV/0! | 0.010 | 95.910  | 0.005 | 211.802 | 0       | 0      | 889     | 567    | 102276  | 25452  | 188216  | 38313  |
| 506.9838 | 12.9 | 2'-azido-dCTP                                                                                                               | 0.005   | 6.294   | 0.001 | 32.000  | 0.000 | 47.704  | 166     | 105    | 1045    | 199    | 32627   | 4852   | 49829   | 4501   |
| 466.1233 | 14.7 | Cys-Trp-Cys-Gly                                                                                                             | 0.002   | 2.444   | 0.411 | 0.997   | 0.512 | 0.877   | 30213   | 1798   | 73836   | 7785   | 81258   | 3338   | 64729   | 10846  |
| 451.1262 | 16.0 | [Fv hydroxy, trihydroxy(3:0/9:1)] 3-(3,4-Dihydroxyphenyl)-1-(3-beta-D-glucopyranosyl-2,4,6-trihydroxyphenyl)-1-propanone    | 0.526   | 0.789   | 0.052 | 0.204   | 0.470 | 0.723   | 10990   | 2049   | 8674    | 2855   | 1461    | 631    | 6271    | 1328   |
| 445.053  | 16.3 | CDP-ethanolamine                                                                                                            | 0.017   | 90.870  | 0.051 | 2.263   | 0.012 | 6.306   | 71      | 71     | 6418    | 1794   | 14384   | 2988   | 40471   | 9037   |
| 426.0223 | 16.6 | ADP                                                                                                                         | 0.001   | 5.765   | 0.006 | 3.757   | 0.007 | 7.457   | 7109    | 1648   | 40984   | 5053   | 161749  | 26768  | 305631  | 61263  |

|          |      |                                                                 |       |         |       |         |       |         |        |        |         |        |         |        |         |        |
|----------|------|-----------------------------------------------------------------|-------|---------|-------|---------|-------|---------|--------|--------|---------|--------|---------|--------|---------|--------|
| 426.0222 | 14.2 | ADP                                                             | 0.001 | 2.030   | 0.067 | 1.385   | 0.006 | 1.743   | 45366  | 3667   | 92094   | 7201   | 130956  | 16330  | 160524  | 16074  |
| 421.1035 | 16.0 | Ala-Asp-Asp-Cys                                                 | 0.002 | 4.234   | 0.001 | 43.095  | 0.000 | 53.933  | 323    | 150    | 1366    | 195    | 55959   | 7164   | 73660   | 7933   |
| 395.0078 | 14.2 | Sucralose                                                       | 0.000 | 2.867   | 0.689 | 1.083   | 0.000 | 0.622   | 16497  | 2085   | 47294   | 1097   | 51411   | 9640   | 29413   | 2284   |
| 394.0042 | 14.3 | Molybdopterin                                                   | 0.000 | 2.297   | 0.000 | 1.588   | 0.000 | 1.468   | 200452 | 7979   | 460367  | 10911  | 730603  | 26244  | 675887  | 23017  |
| 386.0171 | 14.2 | dCDP                                                            | 0.003 | 79.854  | 0.002 | 5.415   | 0.002 | 5.213   | 143    | 91     | 11423   | 2116   | 64715   | 9329   | 59554   | 8886   |
| 383.1196 | 18.3 | Acetyl-maltose                                                  | 0.003 | 7.448   | 0.001 | 8.864   | 0.001 | 15.411  | 960    | 87     | 7151    | 1192   | 71815   | 9073   | 110209  | 16295  |
| 381.1099 | 14.6 | Cys-Ser-Ser-Ser                                                 | 0.001 | 20.367  | 0.004 | 0.381   | 0.002 | 0.267   | 14706  | 2233   | 299516  | 39921  | 118273  | 19079  | 79873   | 13745  |
| 373.0508 | 15.1 | Glucocochlearin                                                 | 0.002 | 0.370   | 0.477 | 1.128   | 0.020 | 0.604   | 27066  | 3026   | 10008   | 682    | 11244   | 1497   | 6047    | 1181   |
| 362.8913 | 14.3 | Tetrachlorvinphos                                               | 0.001 | 0.139   | 0.996 | 1.002   | 0.492 | 1.222   | 32442  | 4499   | 4519    | 682    | 4514    | 1044   | 5522    | 1212   |
| 361.0073 | 14.6 | Coumaphos                                                       | 0.000 | 3.616   | 0.033 | 1.641   | 0.010 | 4.258   | 5051   | 1234   | 18264   | 1872   | 31499   | 4554   | 77775   | 14733  |
| 357.077  | 15.1 | Miraxanthin-I                                                   | 0.034 | 0.587   | 0.025 | 1.379   | 0.025 | 1.425   | 509822 | 71961  | 299123  | 37827  | 419346  | 21513  | 426148  | 29338  |
| 347.1031 | 12.9 | Camptothecin                                                    | 0.318 | 2.407   | 0.025 | 7.015   | 0.004 | 27.130  | 2478   | 1365   | 5965    | 2947   | 50209   | 14060  | 161819  | 31407  |
| 346.0558 | 16.6 | AMP                                                             | 0.006 | 4.043   | 0.002 | 3.539   | 0.002 | 6.331   | 164605 | 21324  | 665524  | 113715 | 2461240 | 334887 | 4213754 | 643282 |
| 346.0558 | 14.2 | AMP                                                             | 0.006 | 1.869   | 0.171 | 1.211   | 0.021 | 1.480   | 58250  | 1833   | 108853  | 11104  | 135239  | 13938  | 161079  | 15231  |
| 341.1088 | 15.2 | Sucrose                                                         | 0.083 | 1.437   | 0.113 | 1.543   | 0.045 | 1.734   | 35140  | 5374   | 50509   | 5869   | 81287   | 15709  | 87575   | 13857  |
| 341.1088 | 14.5 | Sucrose                                                         | 0.004 | 2.684   | 0.001 | 0.217   | 0.002 | 0.263   | 20618  | 2078   | 55340   | 7212   | 12263   | 3233   | 14552   | 6025   |
| 338.0488 | 17.3 | S-sulfanylgutathione                                            | 0.080 | #DIV/0! | 0.006 | 326.271 | 0.005 | 320.140 | 0      | 0      | 250     | 114    | 98076   | 21473  | 80194   | 16914  |
| 334.1257 | 16.0 | N4-(Acetyl-beta-D-glucosaminyl)asparagine                       | 0.000 | 2.554   | 0.000 | 0.061   | 0.000 | 0.112   | 52094  | 4720   | 133053  | 5745   | 8093    | 1606   | 14937   | 2720   |
| 334.0334 | 15.1 | Nicotinate D-ribonucleotide                                     | 0.374 | 0.780   | 0.276 | 1.213   | 0.763 | 1.088   | 35406  | 6309   | 27626   | 5479   | 35437   | 3923   | 30062   | 5634   |
| 333.0594 | 16.0 | sn-glycero-3-Phospho-1-inositol                                 | 0.000 | 8.156   | 0.002 | 0.492   | 0.140 | 0.806   | 191790 | 5941   | 1564278 | 149856 | 794747  | 73388  | 1261008 | 113815 |
| 330.0544 | 14.2 | Piroxicam                                                       | 0.001 | 27.765  | 0.000 | 14.139  | 0.000 | 17.261  | 1757   | 435    | 48797   | 6880   | 715711  | 41686  | 842295  | 41319  |
| 330.0544 | 17.4 | Piroxicam                                                       | 0.042 | #DIV/0! | 0.000 | 48.593  | 0.000 | 50.512  | 0      | 0      | 2419    | 890    | 134011  | 14740  | 122171  | 14486  |
| 328.0454 | 16.6 | 3',5'-Cyclic AMP                                                | 0.006 | 5.171   | 0.004 | 3.765   | 0.002 | 6.333   | 15848  | 2617   | 81951   | 14808  | 326998  | 50244  | 519028  | 77479  |
| 328.0453 | 14.2 | 3',5'-Cyclic AMP                                                | 0.003 | 2.442   | 0.010 | 1.529   | 0.002 | 1.777   | 68013  | 3037   | 166079  | 18373  | 262217  | 23416  | 295102  | 25274  |
| 325.1252 | 15.0 | 2,2,4-Trimethyl-3-(4-fluorophenyl)-2H-1-benzopyran-7-ol acetate | 0.001 | 0.189   | 0.000 | 4.700   | 0.000 | 5.907   | 32171  | 4131   | 6094    | 1892   | 29950   | 2803   | 35999   | 2571   |
| 323.1065 | 12.8 | Acetohexamide                                                   | 0.432 | 0.801   | 0.568 | 1.063   | 0.657 | 1.131   | 40950  | 5474   | 32811   | 8227   | 26758   | 6082   | 37112   | 4340   |
| 323.0289 | 15.1 | UMP                                                             | 0.058 | 1.894   | 0.005 | 30.054  | 0.010 | 35.383  | 958    | 290    | 1813    | 275    | 58587   | 11791  | 64161   | 15455  |
| 323.0286 | 16.2 | UMP                                                             | 0.958 | 0.978   | 0.001 | 12.168  | 0.004 | 20.680  | 20309  | 6341   | 19866   | 5093   | 265025  | 34338  | 410826  | 76990  |
| 323.0286 | 17.8 | UMP                                                             | 0.446 | 1.360   | 0.001 | 7.950   | 0.002 | 18.426  | 6459   | 1810   | 8783    | 2292   | 75724   | 10319  | 161841  | 26763  |
| 323.0238 | 10.0 | Chlorobenzilate                                                 | 0.591 | 0.823   | 0.001 | 2.128   | 0.000 | 3.830   | 453313 | 127034 | 373182  | 65075  | 820126  | 74232  | 1429458 | 115442 |
| 323.0234 | 15.1 | Chlorobenzilate                                                 | 0.003 | 0.474   | 0.063 | 0.610   | 0.093 | 0.528   | 37161  | 3938   | 17625   | 2770   | 10432   | 1964   | 9308    | 3496   |
| 322.0446 | 15.2 | CMP                                                             | 0.004 | 2.461   | 0.081 | 1.446   | 0.019 | 2.415   | 28362  | 1896   | 69803   | 8408   | 104602  | 15171  | 168568  | 29636  |
| 322.0446 | 16.0 | CMP                                                             | 0.002 | 1.795   | 0.001 | 2.107   | 0.000 | 2.095   | 38040  | 1853   | 68269   | 5579   | 146186  | 13337  | 143038  | 10185  |
| 321.0726 | 11.6 | 3-hydroxy-2-oxindole-3-acetyl-asp                               | 0.890 | 1.045   | 0.540 | 1.084   | 0.036 | 1.732   | 27410  | 5167   | 28633   | 6893   | 33668   | 3783   | 49601   | 5090   |

|          |      |                                           |         |         |       |         |       |          |         |       |        |       |          |         |          |         |
|----------|------|-------------------------------------------|---------|---------|-------|---------|-------|----------|---------|-------|--------|-------|----------|---------|----------|---------|
| 317.0556 | 17.1 | Prekinamycin                              | 0.519   | 1.213   | 0.000 | 13.355  | 0.001 | 11.365   | 2046    | 473   | 2482   | 449   | 36527    | 2714    | 28207    | 3496    |
| 308.0988 | 13.2 | N-Acetylneuramate                         | 0.018   | 3.057   | 0.007 | 0.117   | 0.023 | 0.370    | 17209   | 2886  | 52609  | 10390 | 6507     | 1192    | 19484    | 4693    |
| 307.1147 | 15.7 | S-8-methylthiooctylhydroximoyl-L-cysteine | 0.000   | 3.924   | 0.793 | 1.033   | 0.346 | 1.100    | 24963   | 1236  | 97954  | 6069  | 101253   | 10569   | 107795   | 7844    |
| 307.0823 | 14.5 | Allamandin                                | 0.175   | #DIV/0! | 0.228 | 220.425 | 0.002 | 87.625   | 0       | 0     | 1721   | 1088  | 455125   | 330013  | 150772   | 25771   |
| 306.0767 | 15.8 | Glutathione                               | 0.013   | 3.862   | 0.000 | 4.851   | 0.000 | 4.327    | 15812   | 2570  | 61070  | 12107 | 262144   | 25864   | 264273   | 25289   |
| 306.0766 | 17.4 | Glutathione                               | 0.009   | 13.124  | 0.004 | 70.176  | 0.003 | 61.423   | 1353    | 221   | 17751  | 3972  | 1289277  | 248443  | 1090333  | 204657  |
| 306.0766 | 14.2 | Glutathione                               | 0.007   | 15.201  | 0.002 | 127.197 | 0.001 | 209.107  | 8087    | 1262  | 122937 | 25843 | 16762955 | 2965101 | 25706999 | 3517712 |
| 306.0766 | 14.8 | Glutathione                               | 0.006   | 136.196 | 0.026 | 4.184   | 0.014 | 6.550    | 351     | 237   | 47800  | 10218 | 213036   | 53031   | 313082   | 71728   |
| 305.0181 | 15.0 | 2',3'-Cyclic UMP                          | 0.044   | 0.475   | 0.001 | 48.797  | 0.003 | 54.911   | 1891    | 362   | 899    | 195   | 48639    | 6016    | 49356    | 8885    |
| 304.0707 | 14.8 | Phenylamil                                | 0.000   | 0.228   | 0.015 | 2.578   | 0.009 | 2.448    | 90937   | 5765  | 20709  | 2935  | 46966    | 7417    | 50700    | 7524    |
| 304.0608 | 17.1 | Atherospermidine                          | 0.098   | 5.162   | 0.005 | 26.663  | 0.004 | 24.346   | 934     | 560   | 4823   | 1894  | 144230   | 29857   | 117415   | 22930   |
| 302.9988 | 14.5 | 2-bromoporphobilinogen                    | #DIV/0! | #DIV/0! | 0.022 | #DIV/0! | 0.007 | #DIV/0!  | 0       | 0     | 0      | 0     | 35062    | 10728   | 44871    | 10059   |
| 300.0489 | 15.0 | N-Acetyl-D-glucosamine 6-phosphate        | 0.003   | 0.428   | 0.000 | 27.336  | 0.000 | 26.704   | 9399    | 1061  | 4026   | 741   | 113401   | 10901   | 107504   | 9864    |
| 294.8584 | 17.8 | Cu:pyrimidine-2,6-bis(thiocarboxylate)    | 0.000   | 0.529   | 0.000 | 1.451   | 0.000 | 1.457    | 1145474 | 19390 | 606055 | 16528 | 891566   | 22122   | 883012   | 21022   |
| 294.0543 | 15.0 | Acetylsulfamethoxazole                    | 0.019   | 3.509   | 0.159 | 1.309   | 0.049 | 1.550    | 9833    | 3804  | 34503  | 7312  | 47175    | 3323    | 53480    | 3050    |
| 291.0835 | 15.9 | EDTA                                      | 0.915   | 0.985   | 0.192 | 1.218   | 0.007 | 1.440    | 257817  | 21274 | 254070 | 26769 | 309099   | 28751   | 365788   | 16752   |
| 289.0331 | 16.1 | Sedoheptulose 7-phosphate                 | 0.012   | 667.439 | 0.112 | 0.450   | 0.453 | 1.314    | 86      | 86    | 57173  | 14738 | 27961    | 6023    | 75113    | 17550   |
| 282.0844 | 12.7 | Guanosine                                 | 0.092   | 2.694   | 0.007 | 17.598  | 0.001 | 27.553   | 1991    | 544   | 5366   | 1600  | 105504   | 22447   | 147836   | 20218   |
| 282.0384 | 15.0 | N2-Acetyl-L-aminoadipyl-delta-phosphate   | 0.001   | 0.551   | 0.000 | 9.289   | 0.000 | 7.385    | 344262  | 22871 | 189623 | 7957  | 1769531  | 35912   | 1400269  | 76028   |
| 281.0867 | 15.2 | Xylobiose                                 | 0.206   | 1.802   | 0.001 | 2.933   | 0.000 | 3.919    | 7782    | 2625  | 14027  | 3746  | 44662    | 4656    | 54971    | 3389    |
| 277.0587 | 14.7 | Pyrimidine 5'-deoxynucleotide             | 0.000   | 3.418   | 0.283 | 0.859   | 0.015 | 0.730    | 99414   | 9335  | 339817 | 12208 | 288969   | 41302   | 247995   | 25880   |
| 276.0158 | 14.9 | N'-Phosphoguanidinoethyl methyl phosphate | 0.000   | #DIV/0! | 0.001 | 3.125   | 0.000 | 3.532    | 0       | 0     | 27635  | 1494  | 84262    | 8662    | 97609    | 4915    |
| 274.003  | 14.8 | dihydrodopachrome sulfate                 | 0.003   | 2.920   | 0.633 | 1.155   | 0.556 | 0.885    | 12062   | 2179  | 35226  | 4741  | 38061    | 3222    | 31190    | 4623    |
| 273.0382 | 15.1 | 1-Deoxy-D-altro-heptulose 7-phosphate     | 0.036   | 57.932  | 0.023 | 2.909   | 0.004 | 8.893    | 298     | 230   | 17243  | 5968  | 55238    | 11813   | 153336   | 27243   |
| 273.0081 | 14.9 | ferulic acid sulfate or isomer            | 0.000   | 1.497   | 0.014 | 0.919   | 0.002 | 0.793    | 162337  | 6893  | 242992 | 5476  | 223156   | 1214    | 192788   | 9624    |
| 266.0895 | 11.2 | Adenosine                                 | 0.164   | 2.320   | 0.000 | 62.644  | 0.000 | 97.751   | 236     | 115   | 548    | 170   | 41172    | 4400    | 53539    | 5085    |
| 261.038  | 16.0 | Sorbitol 6-phosphate                      | 0.000   | 10.888  | 0.370 | 0.874   | 0.042 | 0.751    | 5629    | 467   | 61289  | 4950  | 54729    | 4921    | 46001    | 4303    |
| 260.0888 | 17.4 | Ala-Asp-Gly                               | 0.092   | #DIV/0! | 0.001 | 96.105  | 0.008 | 88.430   | 0       | 0     | 268    | 129   | 30919    | 4081    | 23708    | 5527    |
| 260.0887 | 14.2 | Ala-Asp-Gly                               | 0.363   | #DIV/0! | 0.002 | 860.877 | 0.000 | 1265.632 | 0       | 0     | 70     | 70    | 72278    | 11516   | 88551    | 10067   |
| 260.0887 | 15.8 | Ala-Asp-Gly                               | 0.014   | 3.729   | 0.005 | 3.303   | 0.491 | 1.212    | 6143    | 553   | 22908  | 4567  | 65343    | 9735    | 27766    | 5037    |
| 259.0224 | 16.0 | D-Glucose 6-phosphate                     | 0.000   | 15.450  | 0.872 | 0.950   | 0.938 | 0.989    | 18839   | 914   | 291063 | 31549 | 283649   | 31732   | 287779   | 25915   |
| 256.0954 | 14.6 | sn-glycero-3-Phosphocholine               | 0.005   | 51.630  | 0.005 | 0.008   | 0.005 | 0.002    | 940     | 238   | 48523  | 10143 | 370      | 175     | 86       | 86      |
| 255.2328 | 16.6 | Hexadecanoic acid                         | 0.388   | 2.479   | 0.451 | 0.426   | 0.361 | 0.361    | 29281   | 4820  | 72599  | 45689 | 35172    | 4528    | 26189    | 8749    |
| 255.028  | 8.3  | validone-7-phosphate                      | #DIV/0! | #DIV/0! | 0.002 | #DIV/0! | 0.009 | #DIV/0!  | 0       | 0     | 0      | 0     | 1274     | 226     | 4248     | 1033    |

|          |      |                                                   |       |         |       |         |       |         |         |       |         |        |         |        |         |        |
|----------|------|---------------------------------------------------|-------|---------|-------|---------|-------|---------|---------|-------|---------|--------|---------|--------|---------|--------|
| 253.0593 | 8.2  | N-&delta;-(phosphonoacetyl)-L-ornithine           | 0.071 | 0.169   | 0.892 | 1.069   | 0.073 | 0.163   | 61287   | 22275 | 10348   | 3789   | 9248    | 6856   | 1688    | 1302   |
| 251.0784 | 9.6  | Deoxyinosine                                      | 0.072 | 2.383   | 0.007 | 21.680  | 0.000 | 35.912  | 427     | 214   | 1017    | 200    | 23962   | 5198   | 36509   | 3636   |
| 249.0491 | 10.2 | [FA (10:0)] 10-bromo-decanoic acid                | 0.829 | 0.958   | 0.623 | 1.046   | 0.181 | 1.255   | 540187  | 63828 | 517742  | 78192  | 561942  | 35460  | 649837  | 44887  |
| 249.0219 | 14.8 | 4,4'-Sulfonyldiphenol                             | 0.016 | 93.496  | 0.299 | 0.581   | 0.770 | 0.890   | 3205    | 569   | 299664  | 83197  | 190574  | 52832  | 266653  | 71702  |
| 246.9263 | 14.8 | 4-iodobenzoate                                    | 0.005 | 2.190   | 0.220 | 0.857   | 0.036 | 0.648   | 27367   | 2977  | 59944   | 7259   | 49492   | 2424   | 38847   | 4095   |
| 246.0463 | 12.6 | DCI                                               | 0.216 | 2.182   | 0.187 | 1.549   | 0.006 | 4.385   | 4633    | 1160  | 10112   | 3784   | 17456   | 3540   | 44345   | 8112   |
| 245.1253 | 14.3 | N2-(D-1-Carboxyethyl)-L-arginine                  | 0.003 | #DIV/0! | 0.009 | 3.588   | 0.022 | 4.363   | 0       | 0     | 5346    | 980    | 20320   | 3766   | 23326   | 5536   |
| 245.0429 | 12.6 | Glycerophosphoglycerol                            | 0.161 | 1.875   | 0.230 | 1.382   | 0.007 | 3.793   | 110540  | 16145 | 207248  | 57860  | 309650  | 55373  | 786174  | 137622 |
| 243.062  | 12.0 | Uridine                                           | 0.624 | 1.141   | 0.000 | 3.804   | 0.000 | 4.458   | 31264   | 5187  | 35668   | 6952   | 150479  | 11204  | 159005  | 13355  |
| 242.0779 | 17.4 | Cytidine                                          | 0.015 | #DIV/0! | 0.000 | 47.074  | 0.000 | 38.864  | 0       | 0     | 1753    | 480    | 84619   | 9374   | 68121   | 7938   |
| 242.0779 | 14.5 | Cytidine                                          | 0.173 | #DIV/0! | 0.025 | 3.304   | 0.002 | 5.032   | 0       | 0     | 102246  | 64435  | 405375  | 92375  | 514525  | 73376  |
| 241.0117 | 16.2 | D-myo-Inositol 1,2-cyclic phosphate               | 0.565 | 1.086   | 0.000 | 7.483   | 0.000 | 8.309   | 471460  | 37026 | 511877  | 56509  | 3940157 | 391127 | 4253205 | 369960 |
| 239.0163 | 16.1 | L-Cystine                                         | 0.141 | 0.590   | 0.012 | 0.200   | 0.015 | 0.259   | 181383  | 39734 | 107102  | 21874  | 22647   | 2238   | 27763   | 2666   |
| 238.8915 | 16.6 | Trimetaphosphate                                  | 0.002 | 4.263   | 0.009 | 3.242   | 0.007 | 4.750   | 1715    | 301   | 7314    | 1040   | 24192   | 4223   | 34742   | 6368   |
| 237.0913 | 10.4 | HEPES                                             | 0.416 | 2.612   | 0.373 | 0.283   | 0.304 | 4.428   | 1026    | 348   | 2679    | 1842   | 853     | 396    | 11865   | 7896   |
| 229.0114 | 15.7 | D-Ribose 5-phosphate                              | 0.000 | 33.235  | 0.003 | 0.424   | 0.063 | 0.718   | 1642    | 283   | 54571   | 6274   | 24159   | 3778   | 39200   | 3151   |
| 228.0986 | 17.4 | Asn-Pro                                           | 0.015 | 18.730  | 0.000 | 45.629  | 0.000 | 44.785  | 113     | 71    | 2112    | 549    | 105824  | 12739  | 94574   | 8480   |
| 228.0986 | 14.2 | Asn-Pro                                           | 0.009 | #DIV/0! | 0.001 | 113.400 | 0.000 | 178.283 | 0       | 0     | 1553    | 377    | 188842  | 29439  | 276908  | 34500  |
| 225.0988 | 15.7 | Carnosine                                         | 0.000 | 1.947   | 0.000 | 0.594   | 0.000 | 0.480   | 76753   | 8058  | 149469  | 4799   | 86409   | 8616   | 71729   | 9226   |
| 221.0662 | 18.3 | 6-Acetyl-D-glucose                                | 0.000 | 6.593   | 0.004 | 5.612   | 0.001 | 8.207   | 1139    | 121   | 7510    | 597    | 42812   | 7145   | 61636   | 7045   |
| 220.1464 | 17.7 | Procarbazine                                      | 0.003 | 3.785   | 0.003 | 0.187   | 0.002 | 0.159   | 103016  | 19537 | 389907  | 58559  | 69148   | 8847   | 61974   | 6177   |
| 220.1464 | 16.8 | Procarbazine                                      | 0.091 | 0.589   | 0.008 | 3.706   | 0.010 | 3.266   | 85200   | 15787 | 50203   | 9091   | 186541  | 33024  | 163942  | 29069  |
| 220.1464 | 13.9 | Procarbazine                                      | 0.954 | 1.012   | 0.000 | 0.389   | 0.000 | 0.258   | 280369  | 53717 | 283800  | 17383  | 108353  | 17180  | 73296   | 31186  |
| 220.1464 | 13.4 | Procarbazine                                      | 0.142 | 1.553   | 0.179 | 1.617   | 0.015 | 0.441   | 61984   | 15953 | 96238   | 14387  | 163807  | 42208  | 42476   | 10649  |
| 220.1464 | 15.5 | Procarbazine                                      | 0.015 | 0.531   | 0.235 | 1.430   | 0.589 | 0.904   | 122707  | 16218 | 65138   | 9314   | 81921   | 9475   | 58868   | 6170   |
| 217.0825 | 9.9  | L-Ala-L-Glu                                       | 0.001 | 16.638  | 0.001 | 14.688  | 0.000 | 35.554  | 110     | 69    | 1828    | 263    | 26230   | 3900   | 64978   | 5943   |
| 216.0521 | 15.7 | 2-(Hydroxymethyl)-3-(acetamidomethylene)succinate | 0.000 | 4.894   | 0.000 | 0.380   | 0.000 | 0.331   | 17602   | 677   | 86148   | 6266   | 33319   | 3277   | 28535   | 1393   |
| 215.0322 | 13.5 | 2-C-Methyl-D-erythritol 4-phosphate               | 0.689 | 1.125   | 0.503 | 0.792   | 0.075 | 1.551   | 51009   | 10214 | 57365   | 11557  | 46674   | 10117  | 88964   | 10877  |
| 215.0322 | 17.2 | 2-C-Methyl-D-erythritol 4-phosphate               | 0.137 | 1.537   | 0.036 | 1.368   | 0.002 | 1.883   | 15409   | 3152  | 23681   | 4002   | 35560   | 2607   | 44582   | 3047   |
| 215.0321 | 14.6 | 2-C-Methyl-D-erythritol 4-phosphate               | 0.000 | 0.182   | 0.762 | 1.168   | 0.950 | 0.978   | 406128  | 21739 | 73763   | 9094   | 83915   | 30648  | 72176   | 22858  |
| 214.048  | 15.7 | sn-glycero-3-Phosphoethanolamine                  | 0.000 | 4.422   | 0.000 | 0.505   | 0.000 | 0.518   | 1950659 | 62320 | 8625737 | 580139 | 4443028 | 375444 | 4464538 | 351885 |
| 213.0334 | 14.3 | Clofibric acid                                    | 0.176 | #DIV/0! | 0.001 | 148.569 | 0.003 | 228.596 | 0       | 0     | 182     | 116    | 32472   | 4928   | 41636   | 7520   |
| 212.0572 | 16.6 | N,N-Dihydroxy-L-tyrosine                          | 0.005 | 2.824   | 0.027 | 1.664   | 0.633 | 1.143   | 8478    | 1592  | 23938   | 3466   | 39672   | 4885   | 27359   | 5963   |
| 211.0008 | 12.5 | P-DPD                                             | 0.031 | 99.026  | 0.718 | 0.764   | 0.033 | 4.152   | 118     | 118   | 11660   | 3897   | 10006   | 2050   | 48416   | 12654  |

|          |      |                                                             |       |          |       |        |       |         |         |        |         |        |         |        |         |        |
|----------|------|-------------------------------------------------------------|-------|----------|-------|--------|-------|---------|---------|--------|---------|--------|---------|--------|---------|--------|
| 211.0008 | 17.8 | P-DPD                                                       | 0.026 | 4.715    | 0.007 | 3.792  | 0.001 | 7.303   | 1361    | 311    | 6417    | 1623   | 25013   | 4400   | 46859   | 5763   |
| 211.0008 | 16.6 | P-DPD                                                       | 0.002 | 4.007    | 0.002 | 3.018  | 0.001 | 4.746   | 32910   | 4875   | 131887  | 17627  | 412057  | 52714  | 625991  | 81210  |
| 211.0007 | 15.2 | P-DPD                                                       | 0.003 | 5.582    | 0.037 | 2.371  | 0.076 | 2.007   | 2966    | 525    | 16554   | 2590   | 40269   | 8433   | 33223   | 7380   |
| 211.0007 | 14.2 | P-DPD                                                       | 0.002 | 2.388    | 0.690 | 0.882  | 0.973 | 1.006   | 13519   | 1359   | 32286   | 3449   | 29414   | 6020   | 32470   | 4151   |
| 210.0878 | 17.4 | Zalcitabine                                                 | 0.009 | 8.892    | 0.001 | 31.341 | 0.001 | 28.574  | 916     | 277    | 8142    | 1782   | 269711  | 35891  | 232638  | 31187  |
| 210.0878 | 14.3 | Zalcitabine                                                 | 0.004 | #DIV/0!  | 0.002 | 84.975 | 0.000 | 127.120 | 0       | 0      | 7264    | 1448   | 630431  | 101698 | 923458  | 111006 |
| 203.0279 | 14.4 | 4-Chloro-4'-biphenylol                                      | 0.000 | 1.810    | 0.003 | 0.248  | 0.009 | 0.212   | 43655   | 4897   | 79027   | 3669   | 19679   | 11798  | 16724   | 15334  |
| 203.0198 | 15.1 | Oxaloglutarate                                              | 0.713 | 0.937    | 0.001 | 1.642  | 0.000 | 1.804   | 223660  | 30972  | 209460  | 20772  | 348780  | 4307   | 377820  | 13868  |
| 199.0717 | 14.2 | 3-(3,4-Dihydroxypyridin-1-yl)-L-alanine                     | 0.049 | #DIV/0!  | 0.001 | 64.749 | 0.001 | 108.009 | 0       | 0      | 479     | 185    | 25700   | 3318   | 51689   | 7665   |
| 198.0877 | 17.4 | gamma-Glutamyl-beta-aminopropionitrile                      | 0.014 | 6.900    | 0.000 | 24.983 | 0.000 | 23.649  | 738     | 119    | 5094    | 1173   | 140195  | 16758  | 120474  | 13966  |
| 198.0876 | 14.2 | gamma-Glutamyl-beta-aminopropionitrile                      | 0.005 | 4.478    | 0.001 | 41.263 | 0.001 | 63.841  | 304     | 63     | 1361    | 229    | 63714   | 8102   | 86857   | 12617  |
| 197.0561 | 17.3 | (S)-2-Amino-3-(3-hydroxy-4-oxo-4H-pyridin-1-yl)propanoate   | 0.062 | 2.855    | 0.001 | 62.191 | 0.000 | 60.678  | 351     | 31     | 1001    | 272    | 67657   | 8538   | 60749   | 6696   |
| 197.056  | 14.2 | (S)-2-Amino-3-(3-hydroxy-4-oxo-4H-pyridin-1-yl)propanoate   | 0.002 | 86.194   | 0.001 | 57.772 | 0.000 | 85.414  | 44      | 44     | 3819    | 627    | 233922  | 34442  | 326193  | 35944  |
| 195.0502 | 13.3 | D-Gluconic acid                                             | 0.000 | 2.891    | 0.007 | 1.759  | 0.000 | 2.330   | 15011   | 1367   | 43399   | 3100   | 78116   | 8326   | 101127  | 8026   |
| 195.0502 | 14.0 | D-Gluconic acid                                             | 0.328 | 0.651    | 0.000 | 3.008  | 0.015 | 4.361   | 49393   | 15576  | 32175   | 4104   | 101237  | 8438   | 140306  | 30022  |
| 194.9634 | 15.1 | tetranitromethane                                           | 0.000 | 20.028   | 0.000 | 0.257  | 0.000 | 0.117   | 3206    | 816    | 64211   | 6324   | 15784   | 2952   | 7534    | 1535   |
| 194.0621 | 17.2 | 4-(2-Benzofuranyl)pyridine                                  | 0.565 | 1.241    | 0.000 | 20.808 | 0.000 | 21.077  | 2510    | 674    | 3115    | 760    | 70937   | 5616   | 65656   | 6702   |
| 193.0346 | 16.1 | D-Glucuronate                                               | 0.637 | 1.127    | 0.000 | 3.997  | 0.000 | 4.670   | 13487   | 2040   | 15199   | 2857   | 60319   | 2453   | 70973   | 5698   |
| 192.99   | 16.6 | 2-Chloro-3-oxoadipate                                       | 0.013 | 6.062    | 0.003 | 3.269  | 0.001 | 5.061   | 3804    | 1373   | 23062   | 5228   | 76740   | 11016  | 116711  | 15494  |
| 191.0189 | 18.1 | Citrate                                                     | 0.000 | 9032.522 | 0.000 | 0.024  | 0.000 | 0.017   | 1085    | 453    | 9800562 | 926163 | 238036  | 46071  | 165082  | 35027  |
| 191.0011 | 15.2 | furan dimethanol sulfate                                    | 0.388 | 1.332    | 0.000 | 2.765  | 0.000 | 3.059   | 9255    | 1526   | 12331   | 2989   | 35445   | 2335   | 37723   | 2241   |
| 189.0396 | 10.5 | [FA hydroxy,oxo(7:0/2:0)] 4-hydroxy-2-oxo-Heptanedioic acid | 0.027 | 2.267    | 0.177 | 0.672  | 0.940 | 1.015   | 15623   | 4243   | 35416   | 6191   | 25291   | 2550   | 35964   | 3390   |
| 189.004  | 15.2 | Oxalosuccinate                                              | 0.134 | 1.528    | 0.001 | 2.158  | 0.000 | 2.518   | 29766   | 5487   | 45475   | 7812   | 102096  | 9485   | 114499  | 9694   |
| 187.0398 | 14.5 | 1-Hydroxy-2-naphthoate                                      | 0.010 | #DIV/0!  | 0.011 | 72.027 | 0.002 | 90.206  | 0       | 0      | 494     | 122    | 37673   | 9362   | 44528   | 7274   |
| 185.0559 | 17.4 | (S)-AMPA                                                    | 0.009 | 4.130    | 0.000 | 28.714 | 0.001 | 25.672  | 415     | 97     | 1712    | 328    | 46143   | 5058   | 43959   | 5736   |
| 185.0558 | 14.2 | (S)-AMPA                                                    | 0.000 | 4.442    | 0.001 | 93.902 | 0.001 | 148.153 | 270     | 90     | 1201    | 117    | 119536  | 17551  | 177946  | 23512  |
| 183.9919 | 15.1 | L-Serine O-sulfate                                          | 0.275 | 0.803    | 0.166 | 1.227  | 0.046 | 1.392   | 76766   | 9383   | 61622   | 9168   | 76967   | 3562   | 85754   | 1592   |
| 183.9919 | 17.1 | L-Serine O-sulfate                                          | 0.188 | 1.761    | 0.000 | 8.351  | 0.000 | 7.288   | 4666    | 1425   | 8217    | 2041   | 66256   | 7376   | 59888   | 4539   |
| 183.9919 | 14.4 | L-Serine O-sulfate                                          | 0.000 | 3.119    | 0.000 | 3.194  | 0.000 | 3.981   | 16141   | 1703   | 50349   | 3434   | 167854  | 9170   | 200458  | 7196   |
| 182.0742 | 13.9 | Chlorphentermine                                            | 0.195 | 1.255    | 0.121 | 0.752  | 0.911 | 0.985   | 65052   | 7072   | 81620   | 9515   | 63053   | 4545   | 80393   | 4740   |
| 182.0619 | 17.3 | p-Fluorophenylalanine                                       | 0.075 | 8.499    | 0.000 | 75.118 | 0.000 | 72.259  | 52      | 52     | 442     | 173    | 33319   | 2668   | 31968   | 2907   |
| 181.0709 | 13.9 | D-Sorbitol                                                  | 0.127 | 1.286    | 0.078 | 0.745  | 0.546 | 0.926   | 1185688 | 124178 | 1524288 | 159357 | 1165041 | 66540  | 1412126 | 77407  |
| 180.0657 | 13.0 | L-Tyrosine                                                  | 0.859 | 1.100    | 0.527 | 1.170  | 0.003 | 3.142   | 105461  | 43346  | 115978  | 37826  | 152067  | 40009  | 364394  | 48683  |
| 179.0552 | 14.7 | D-Glucose                                                   | 0.000 | 0.429    | 0.002 | 0.268  | 0.000 | 0.094   | 185815  | 10174  | 79641   | 5818   | 21749   | 11321  | 7501    | 4529   |

|          |      |                                                     |         |          |       |         |         |         |          |         |          |         |          |         |          |        |
|----------|------|-----------------------------------------------------|---------|----------|-------|---------|---------|---------|----------|---------|----------|---------|----------|---------|----------|--------|
| 179.0552 | 17.2 | D-Glucose                                           | 0.166   | 1.275    | 0.052 | 1.281   | 0.004   | 1.596   | 1946804  | 191904  | 2482615  | 297120  | 3280318  | 190592  | 3961288  | 250437 |
| 179.0453 | 17.4 | Nicotinurate                                        | 0.000   | 4.707    | 0.001 | 37.572  | 0.001   | 33.623  | 986      | 323     | 4642     | 525     | 181283   | 25335   | 156087   | 21806  |
| 177.033  | 17.4 | Cys-Gly                                             | 0.023   | 15.004   | 0.001 | 83.233  | 0.001   | 78.004  | 50       | 50      | 757      | 221     | 67285    | 9579    | 59051    | 7417   |
| 177.033  | 14.2 | Cys-Gly                                             | 0.024   | #DIV/0!  | 0.002 | 106.930 | 0.000   | 169.136 | 0        | 0       | 3053     | 959     | 347997   | 56320   | 516377   | 64076  |
| 176.935  | 15.9 | Pyrophosphate                                       | 0.934   | 0.985    | 0.614 | 1.032   | 0.022   | 1.467   | 10555341 | 1194844 | 10395445 | 1464902 | 11332460 | 1034282 | 15249693 | 917019 |
| 176.0569 | 16.6 | 4-Hydroxy-4-methylglutamate                         | 0.004   | 2.247    | 0.445 | 1.128   | 0.515   | 1.284   | 11233    | 1829    | 25244    | 3057    | 28650    | 2997    | 32415    | 9910   |
| 175.048  | 17.2 | Allantoate                                          | 0.433   | 1.191    | 0.000 | 12.563  | 0.000   | 11.885  | 10054    | 894     | 11978    | 2127    | 150270   | 11307   | 142367   | 11006  |
| 175.048  | 14.2 | Allantoate                                          | 0.001   | 3.700    | 0.004 | 3.195   | 0.001   | 4.806   | 4045     | 212     | 14966    | 1508    | 47859    | 6698    | 71935    | 9191   |
| 174.0874 | 16.1 | L-Citrulline                                        | 0.000   | 35.759   | 0.000 | 0.203   | 0.000   | 0.268   | 3667     | 1071    | 131131   | 6792    | 26150    | 2554    | 35085    | 5020   |
| 173.0082 | 18.1 | Phenylmethanesulfonyl fluoride                      | 0.000   | 2144.115 | 0.000 | 0.017   | 0.000   | 0.013   | 174      | 122     | 373177   | 33054   | 6616     | 1439    | 4805     | 1334   |
| 171.0765 | 17.3 | Glycylproline                                       | 0.439   | 1.291    | 0.000 | 28.028  | 0.000   | 28.205  | 1995     | 400     | 2575     | 593     | 77481    | 7929    | 72630    | 5525   |
| 171.0054 | 15.7 | sn-Glycerol 3-phosphate                             | 0.000   | 4.428    | 0.000 | 0.431   | 0.000   | 0.322   | 15089    | 738     | 66820    | 3698    | 29182    | 3165    | 21527    | 1175   |
| 171.0054 | 12.6 | sn-Glycerol 3-phosphate                             | 0.203   | 1.814    | 0.143 | 1.568   | 0.005   | 4.523   | 9080     | 1681    | 16476    | 4907    | 29449    | 6462    | 74518    | 12872  |
| 167.0567 | 15.5 | N-Cyclopropylammelide                               | 0.835   | 0.953    | 0.474 | 0.951   | 0.057   | 0.656   | 56456    | 11135   | 53820    | 4859    | 48229    | 5722    | 35301    | 6963   |
| 167.0567 | 16.6 | N-Cyclopropylammelide                               | 0.458   | 1.684    | 0.305 | 0.370   | 0.287   | 0.397   | 48870    | 5488    | 82299    | 41343   | 34829    | 5417    | 32668    | 6570   |
| 167.0566 | 13.2 | N-Cyclopropylammelide                               | 0.365   | 0.677    | 0.124 | 2.120   | 0.163   | 0.716   | 107125   | 33613   | 72495    | 11128   | 136057   | 33788   | 51942    | 7681   |
| 167.0566 | 13.9 | N-Cyclopropylammelide                               | 0.127   | 0.490    | 0.741 | 0.815   | 0.173   | 0.411   | 193484   | 47408   | 94847    | 34753   | 82230    | 11111   | 38973    | 8376   |
| 167.0566 | 12.1 | N-Cyclopropylammelide                               | 0.900   | 1.012    | 0.231 | 0.890   | 0.082   | 0.798   | 858420   | 45000   | 868987   | 68423   | 754396   | 57940   | 693076   | 59865  |
| 166.0976 | 17.4 | 2-Dimethylamino-5,6-dimethylpyrimidin-4-ol          | 0.363   | #DIV/0!  | 0.001 | 205.838 | 0.000   | 207.200 | 0        | 0       | 243      | 243     | 60118    | 7700    | 50430    | 5669   |
| 166.0282 | 15.7 | demethyl-phosphinothricin                           | 0.000   | 3.431    | 0.000 | 0.505   | 0.000   | 0.519   | 163921   | 4799    | 562334   | 26736   | 288656   | 23011   | 292101   | 18869  |
| 165.0329 | 13.5 | 2-methylphosphinoyl-2-hydroxyacetate                | 0.251   | 1.317    | 0.000 | 3.296   | 0.001   | 5.355   | 36064    | 6994    | 47498    | 6226    | 163018   | 13399   | 254370   | 32647  |
| 164.0362 | 13.7 | Formylanthranilate                                  | #DIV/0! | #DIV/0!  | 0.177 | #DIV/0! | #DIV/0! | #DIV/0! | 0        | 0       | 0        | 0       | 94       | 60      | 0        | 0      |
| 161.0458 | 9.6  | 2-Dehydro-3-deoxy-L-rhamnonate                      | 0.122   | 2.840    | 0.002 | 13.404  | 0.004   | 20.580  | 348      | 169     | 988      | 326     | 15886    | 2631    | 20325    | 3855   |
| 161.0096 | 14.2 | 4-Hydroxy-2-oxoglutarate                            | 0.004   | #DIV/0!  | 0.000 | 24.576  | 0.007   | 28.026  | 0        | 0       | 1681     | 339     | 42392    | 4946    | 47119    | 10428  |
| 157.0303 | 14.7 | 1,4-Naphthoquinone                                  | 0.003   | 0.139    | 0.076 | 2.820   | 0.029   | 2.736   | 19988    | 3284    | 2787     | 511     | 8883     | 2732    | 7627     | 1614   |
| 156.042  | 13.2 | 5-diazo-4-oxo-norvaline                             | 0.637   | 0.895    | 0.277 | 1.389   | 0.020   | 0.559   | 52477    | 10628   | 46961    | 3183    | 62622    | 12613   | 26248    | 6217   |
| 149.046  | 11.6 | D-Ribose                                            | 0.700   | 1.070    | 0.740 | 1.011   | 0.092   | 1.260   | 40096    | 5345    | 42901    | 4631    | 44731    | 2620    | 54058    | 3754   |
| 149.0447 | 8.7  | D-Ribose                                            | 0.170   | 1.631    | 0.000 | 7.693   | 0.000   | 10.010  | 4855     | 958     | 7917     | 1781    | 65705    | 5592    | 79249    | 5471   |
| 146.064  | 15.1 | 5-methylthiopentanaldoxime                          | 0.423   | 1.183    | 0.000 | 1.951   | 0.000   | 2.259   | 210449   | 31434   | 248877   | 33492   | 499791   | 17945   | 562323   | 14637  |
| 146.0577 | 15.1 | L-Albizzine                                         | 0.684   | 1.095    | 0.000 | 1.852   | 0.000   | 2.203   | 23805    | 3427    | 26070    | 4181    | 53586    | 2474    | 57428    | 2482   |
| 144.0484 | 17.4 | 5-methylthiopentanonitrile oxide                    | 0.042   | 8.837    | 0.000 | 85.150  | 0.000   | 79.448  | 51       | 51      | 451      | 148     | 40495    | 4916    | 35797    | 3643   |
| 144.0483 | 14.2 | 5-methylthiopentanonitrile oxide                    | 0.175   | #DIV/0!  | 0.003 | 803.583 | 0.000   | 776.295 | 0        | 0       | 141      | 89      | 68082    | 12668   | 109454   | 11501  |
| 135.03   | 10.3 | [FA trihydroxy(4:0)] 2,3,4-trihydroxy-butanoic acid | 0.645   | 1.234    | 0.000 | 3.710   | 0.073   | 1.678   | 4921     | 2044    | 6073     | 1272    | 22217    | 2289    | 10188    | 1597   |
| 135.03   | 9.6  | [FA trihydroxy(4:0)] 2,3,4-trihydroxy-butanoic acid | 0.737   | 1.152    | 0.000 | 9.204   | 0.000   | 15.693  | 1556     | 443     | 1792     | 518     | 17980    | 1413    | 28115    | 2275   |



|          |      |                                       |       |         |       |        |       |        |          |        |          |         |          |        |          |        |
|----------|------|---------------------------------------|-------|---------|-------|--------|-------|--------|----------|--------|----------|---------|----------|--------|----------|--------|
| 134.046  | 17.4 | 4-Hydroxy-L-threonine                 | 0.342 | 1.267   | 0.004 | 3.328  | 0.170 | 1.966  | 1127276  | 215045 | 1428307  | 211696  | 4322212  | 606786 | 2808540  | 850951 |
| 134.046  | 14.1 | 4-Hydroxy-L-threonine                 | 0.000 | 1.712   | 0.001 | 0.703  | 0.003 | 0.769  | 2867209  | 86241  | 4908253  | 227052  | 3494855  | 144465 | 3772526  | 149356 |
| 134.046  | 16.6 | 4-Hydroxy-L-threonine                 | 0.000 | 1.631   | 0.000 | 1.385  | 0.000 | 1.461  | 17527416 | 637819 | 28582051 | 1411383 | 39863493 | 514988 | 41744489 | 975396 |
| 134.046  | 15.2 | 4-Hydroxy-L-threonine                 | 0.000 | 2.204   | 0.000 | 0.656  | 0.000 | 0.577  | 786282   | 28284  | 1732652  | 16618   | 1131579  | 25137  | 1000390  | 40237  |
| 133.0143 | 19.4 | (S)-Malate                            | 0.000 | 6.553   | 0.003 | 2.026  | 0.001 | 3.380  | 5645     | 943    | 36992    | 4024    | 73781    | 7698   | 125037   | 14686  |
| 132.0483 | 15.2 | 4-methylthiobutanaldoxime             | 0.147 | 1.427   | 0.001 | 2.254  | 0.001 | 2.586  | 26640    | 3907   | 38028    | 5978    | 88528    | 8519   | 98338    | 9752   |
| 132.0303 | 16.7 | L-Aspartate                           | 0.290 | 1.345   | 0.037 | 1.585  | 0.702 | 1.218  | 24380    | 5547   | 32797    | 5095    | 55952    | 7889   | 39958    | 17041  |
| 127.0194 | 14.5 | [FA (9:1/3:0)] 2-nonene-4,6,8-triynal | 0.002 | 0.094   | 0.005 | 6.927  | 0.001 | 8.855  | 183522   | 27949  | 17238    | 4519    | 122372   | 22478  | 152635   | 21223  |
| 126.0421 | 14.3 | 2-Hydroxy-4,6-diamino-1,3,5-triazine  | 0.005 | #DIV/0! | 0.008 | 14.180 | 0.003 | 22.455 | 0        | 0      | 647      | 135     | 10153    | 2229   | 14528    | 2517   |
